# Supplementary material
Source: PubMed Central journal article supplement (PMC5098040)

# HEK293-WT<sub>pyr</sub>QIHATTPVR + HexNAC<sub>3</sub>

HEK293\_DG373Fc\_3#3310 RT: 23.10 AV: 1 NL: 1.05E6  
 F: FTMS + p NSI Full ms

MS

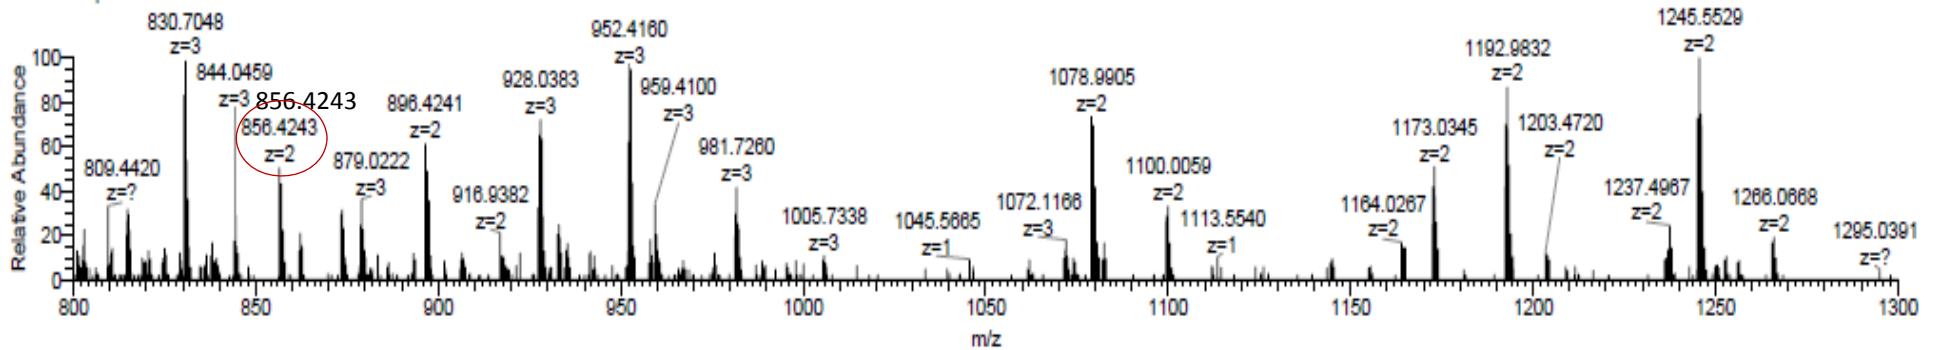

HEK293\_DG373Fc\_3#3308 RT: 23.10 AV: 1 NL: 6.86E4  
 T: FTMS + p NSI d Full ms2 856.4242@hed28.00 [120.0000-1723.0000]

MS<sup>2</sup>  
 HCD

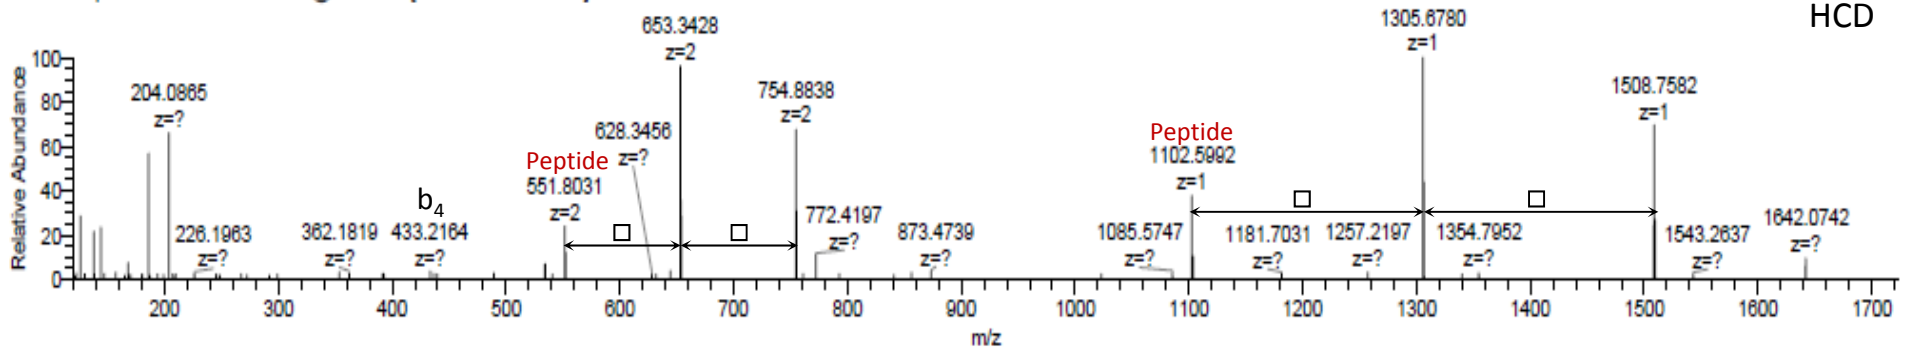

HEK293\_DG373Fc\_3#3309 RT: 23.10 AV: 1 NL: 9.00E3  
 T: ITMS + c NSI r d Full ms2 856.4242@cid30.00 [230.0000-1723.0000]

MS<sup>2</sup>  
 CID

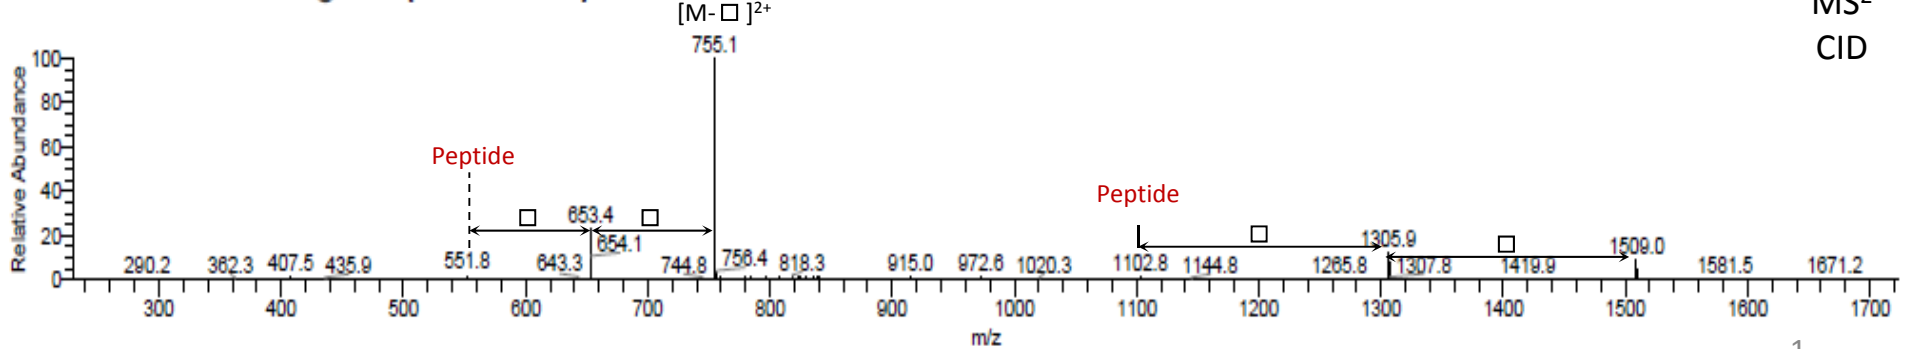

# HCT116-WT<sub>pyr</sub>QIHA**T**PT**P**VR + Hex<sub>1</sub>HexNAc<sub>1</sub>NeuAc<sub>1</sub>

HCT116\_DG373Fc\_WT\_2#3230-3264 RT: 27.36-27.64 AV: 29 NL: 2.33E5  
 F: FTMS + p NSI Full ms [550.0000-2000.0000]

MS

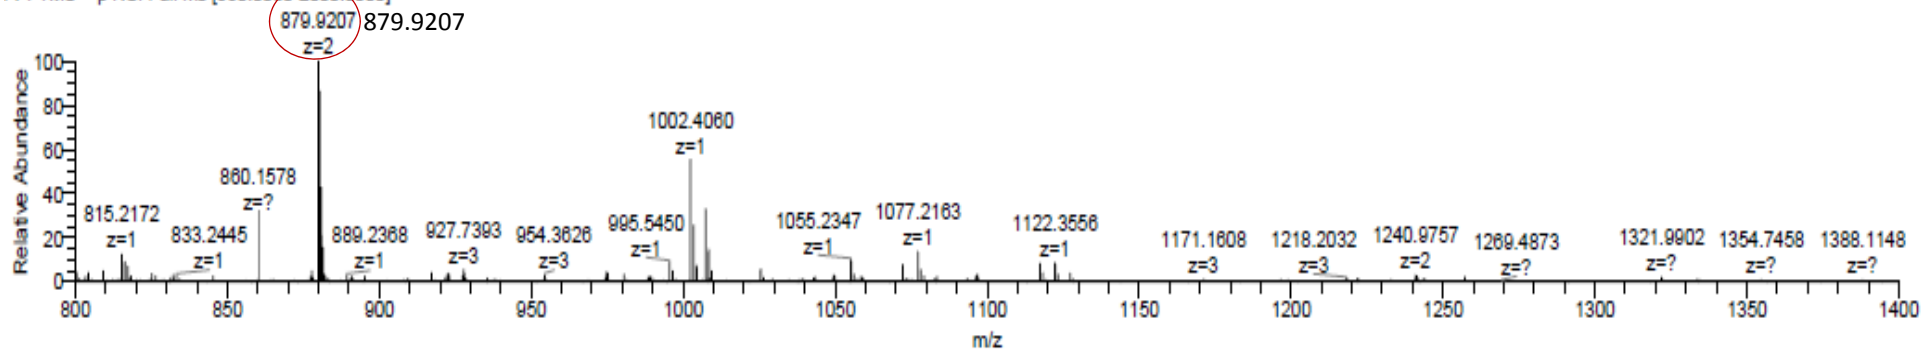

HCT116\_DG373Fc\_WT\_2#3245 RT: 27.48 AV: 1 NL: 1.20E5  
 T: FTMS + p NSI d Full ms2 879.9205@hed28.00 [120.0000-1770.0000]

MS<sup>2</sup>  
HCD

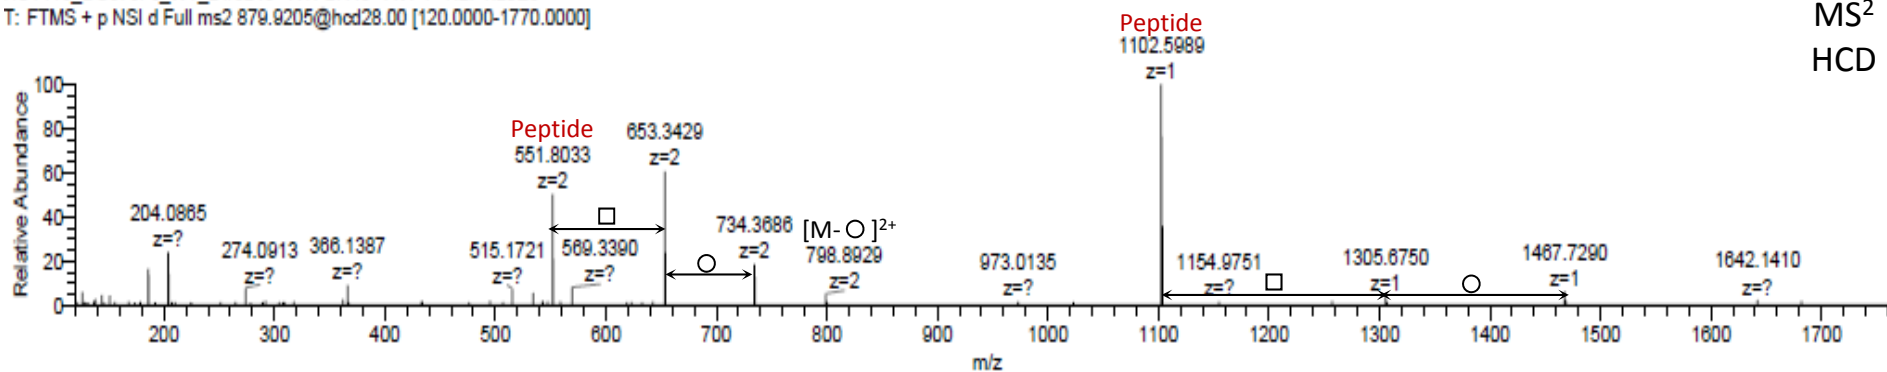

HCT116\_DG373Fc\_WT\_2#3246 RT: 27.49 AV: 1 NL: 5.43E3  
 T: ITMS + c NSI r d Full ms2 879.9205@cid30.00 [237.0000-1770.0000]

MS<sup>2</sup>  
CID

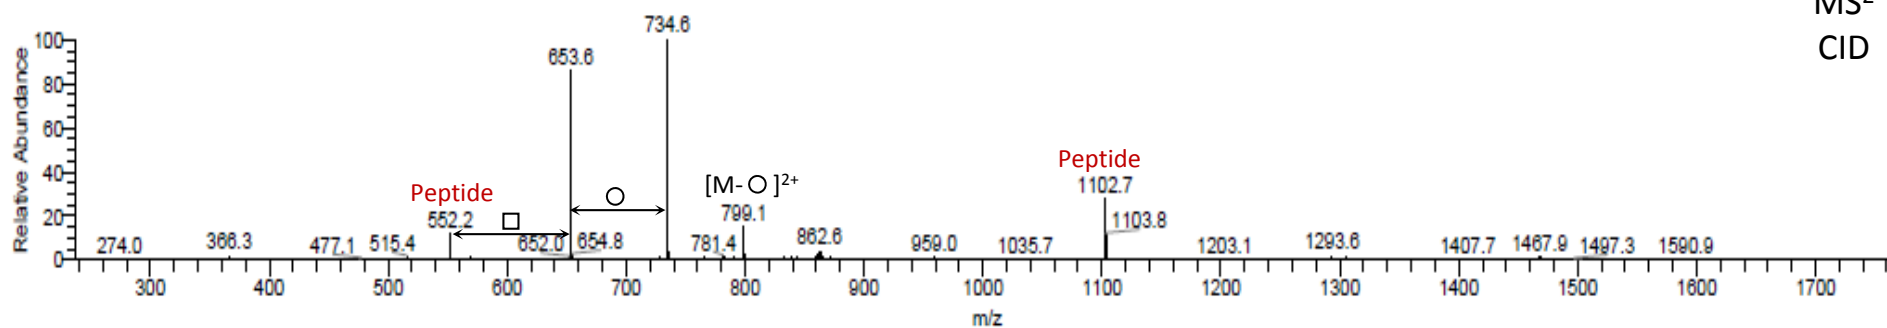

# HEK293-WT<sub>pyr</sub>QIHATPTPVR + Hex<sub>3</sub>HexNAC<sub>1</sub>

MS

HEK293\_DG373Fc\_3#3241-3343 RT: 22.87-23.23 AV: 29 NL: 5.67E5  
F: FTMS + p NSI Full ms

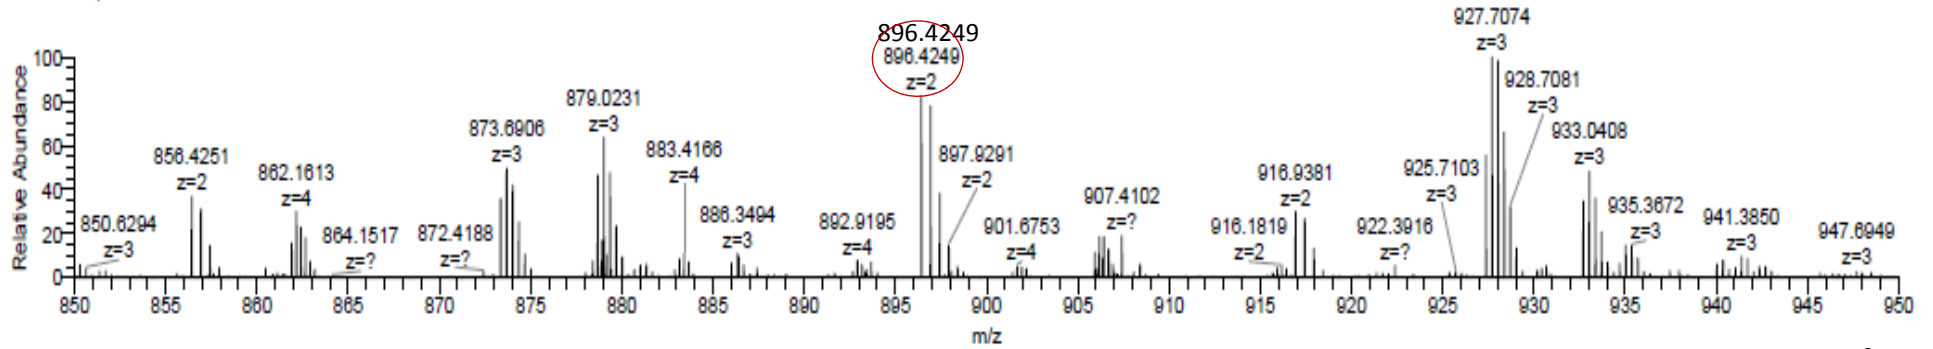

HEK293\_DG373Fc\_3#3274 RT: 22.99 AV: 1 NL: 9.30E4  
T: FTMS + p NSI d Full ms2 896.4249@hod28.00 [120.0000-1803.0000]

MS<sup>2</sup>  
HCD

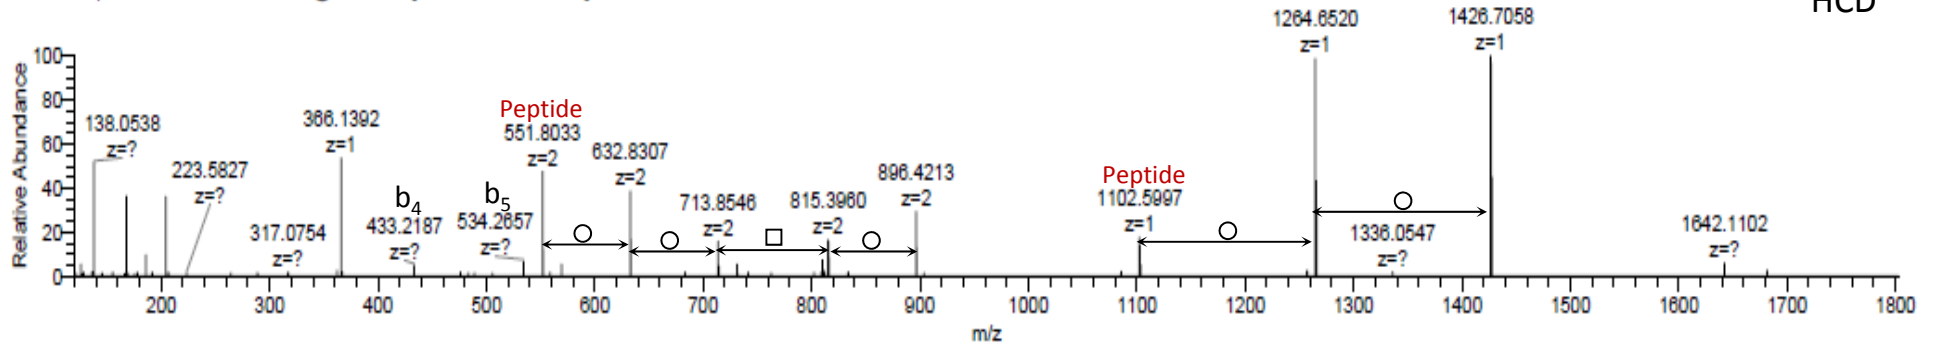

HEK293\_DG373Fc\_3#3276 RT: 22.99 AV: 1 NL: 5.30E3  
T: ITMS + c NSI r d Full ms2 896.4249@cid30.00 [241.0000-1803.0000]

MS<sup>2</sup>  
CID

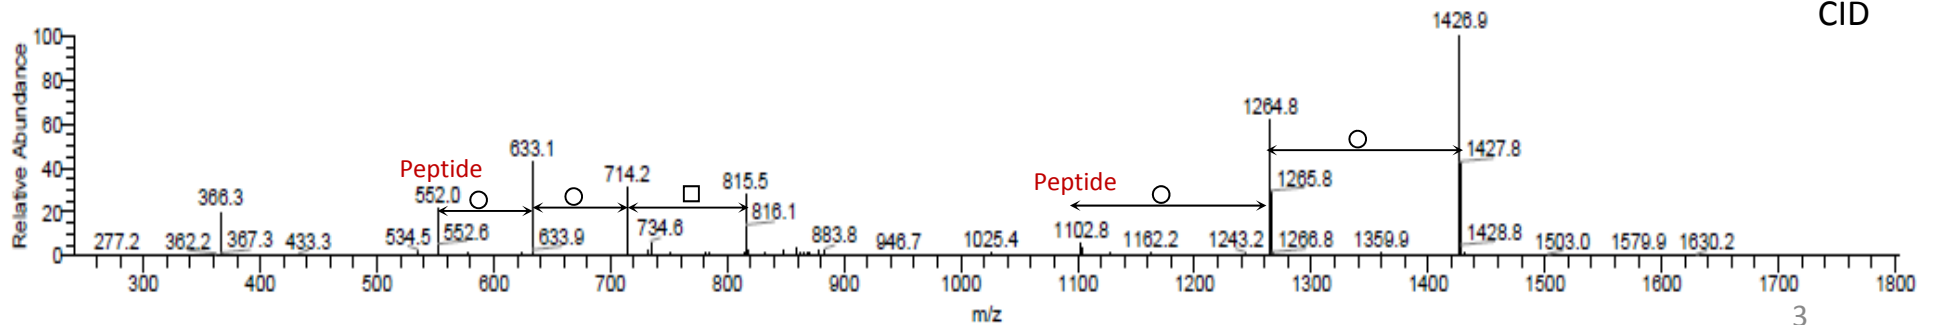

# HCT116-WT<sub>pyr</sub>QIHA**T**PTVR + Hex<sub>2</sub>HexNAc<sub>2</sub>

HCT116\_aDG\_Fc\_WT\_2#4878-5036 RT: 20.82-21.03 AV: 5 NL: 6.02E7  
F: FTMS + p NSI Full ms

MS

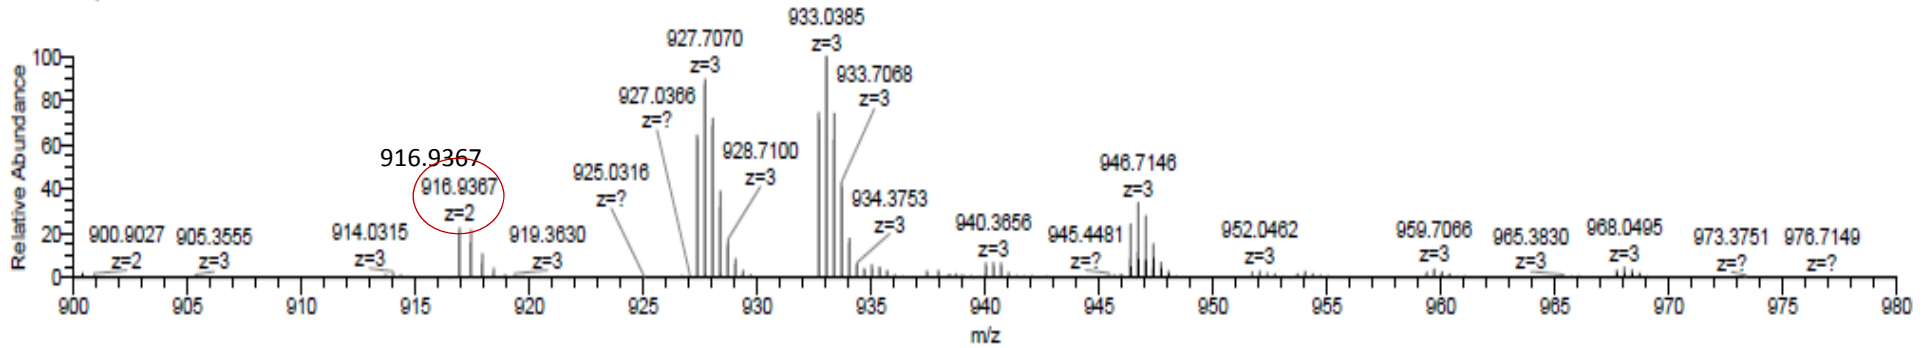

HCT116\_aDG\_Fc\_WT\_2#4841 RT: 20.76 AV: 1 NL: 1.35E5  
T: FTMS + p NSI d Full ms2 916.9369@hod28.00 [120.0000-1844.0000]

MS<sup>2</sup>  
HCD

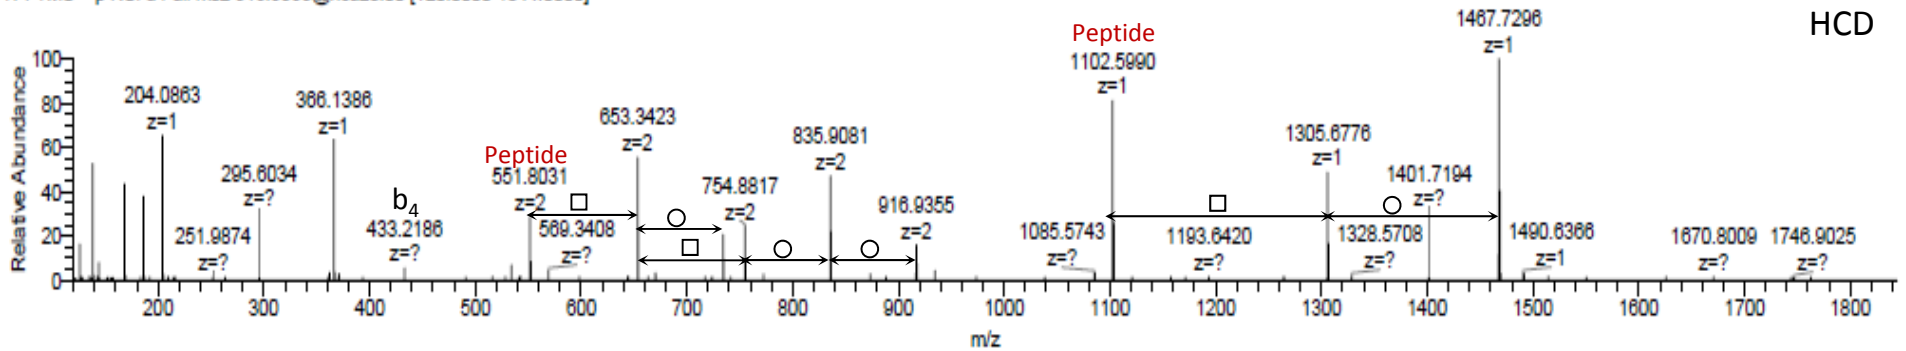

HCT116\_aDG\_Fc\_WT\_2#4844 RT: 20.76 AV: 1 NL: 1.37E4  
T: ITMS + c NSI r d Full ms2 916.9369@cid30.00 [247.0000-1844.0000]

MS<sup>2</sup>  
CID

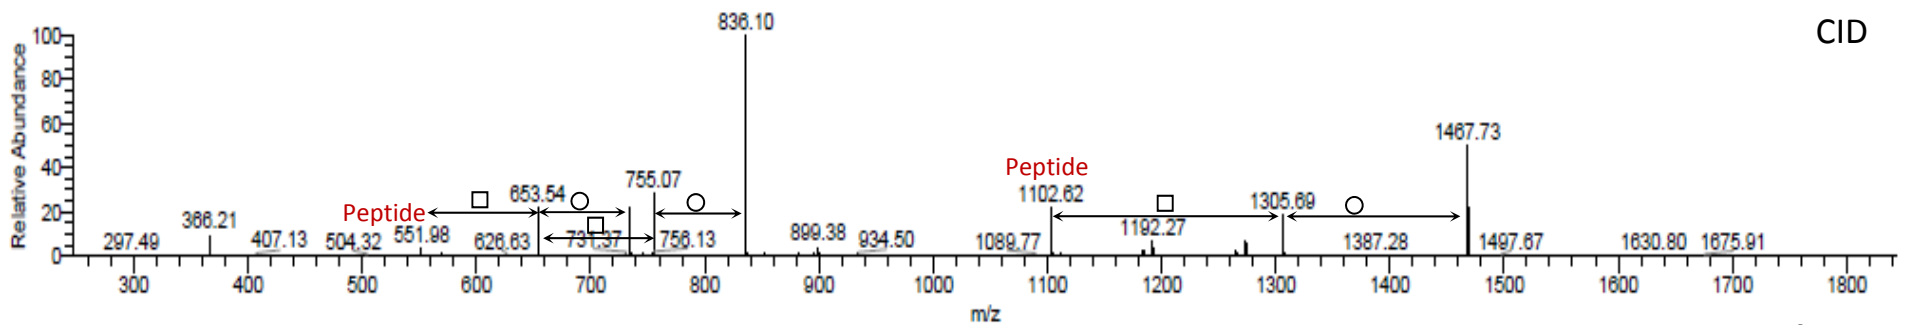

# HEK293-WT<sub>pyr</sub>QIHATTPVR + Hex<sub>1</sub>HexNAC<sub>3</sub>

MS

HEK293\_DG373Fc\_3 #2648-2888 RT: 21.38-21.93 AV: 28 NL: 1.04E7  
F: FTMS + p NSI Full ms

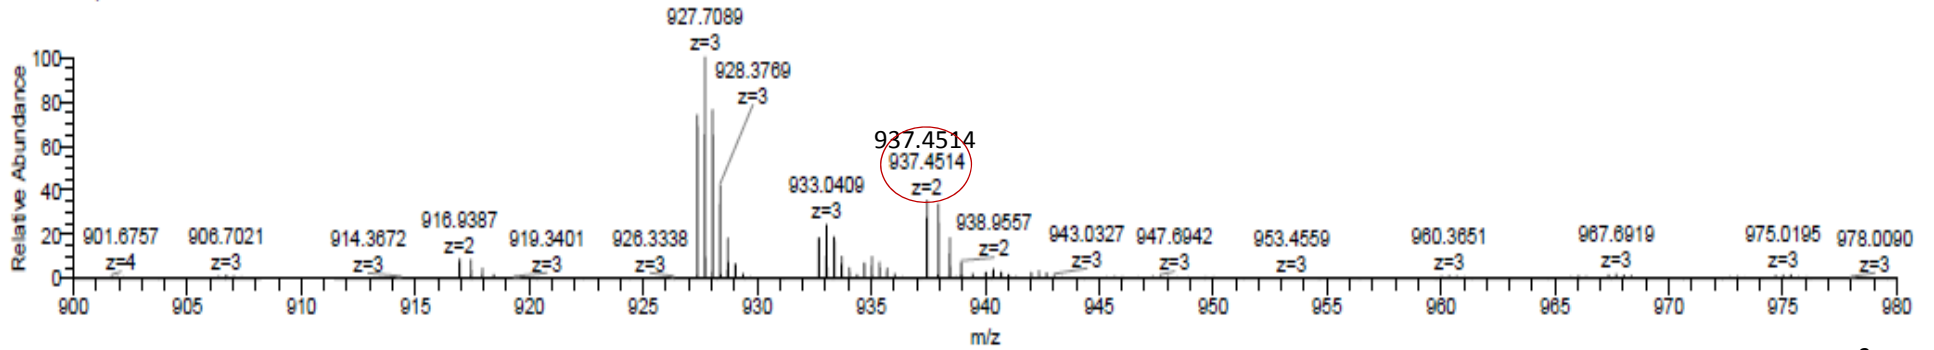

HEK293\_DG373Fc\_3 #2688 RT: 21.45 AV: 1 NL: 1.21E5  
T: FTMS + p NSI d Full ms2 937.4518@hcd28.00 [120.0000-1885.0000]

MS<sup>2</sup>  
HCD

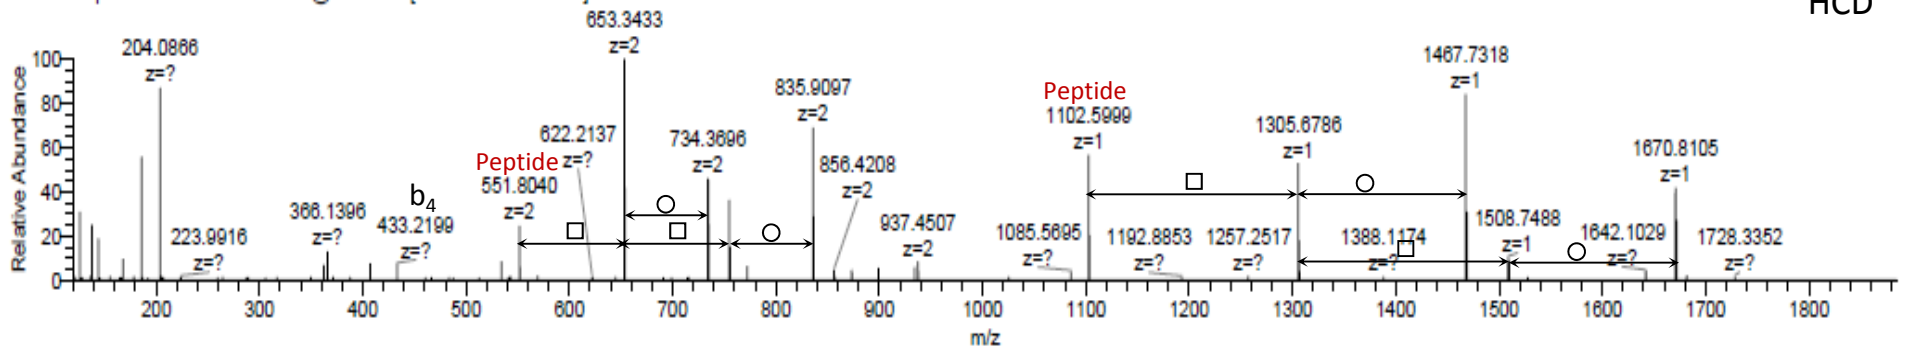

HEK293\_DG373Fc\_3 #2670 RT: 21.46 AV: 1 NL: 1.94E4  
T: ITMS + c NSI r d Full ms2 937.4518@cid30.00 [253.0000-1885.0000]

MS<sup>2</sup>  
CID

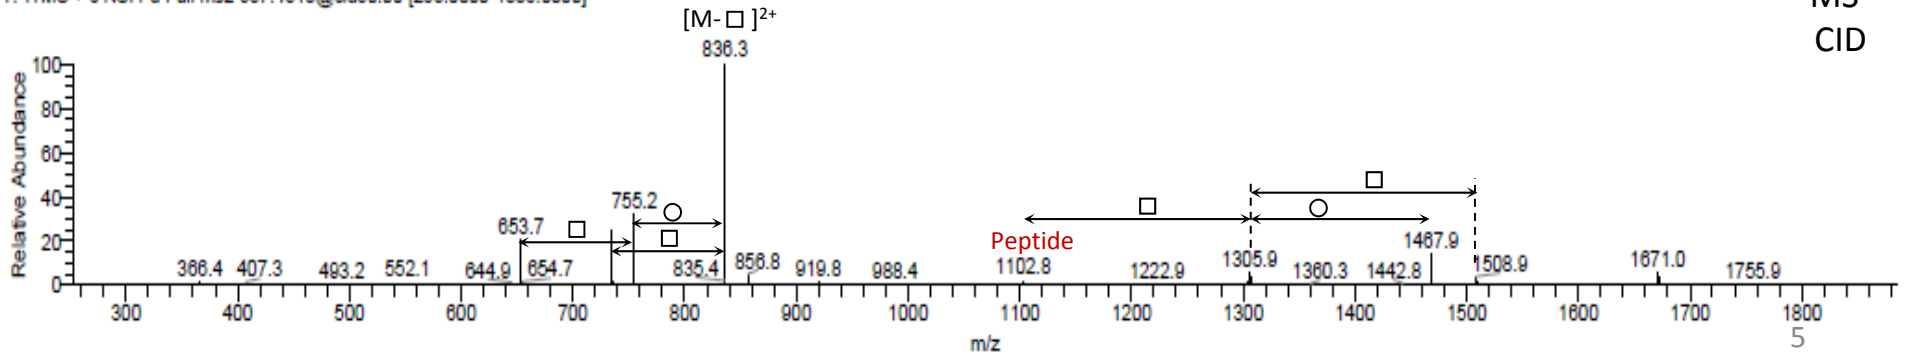

# HEK293-WT<sub>pyr</sub>QIHATTPVR + Hex<sub>2</sub>HexNAC<sub>3</sub>

HEK293\_DG373Fc\_3 #2354-2443 RT: 20.18-20.68 AV: 45 NL: 3.99E5  
F: FTMS + p NSI Full ms

MS

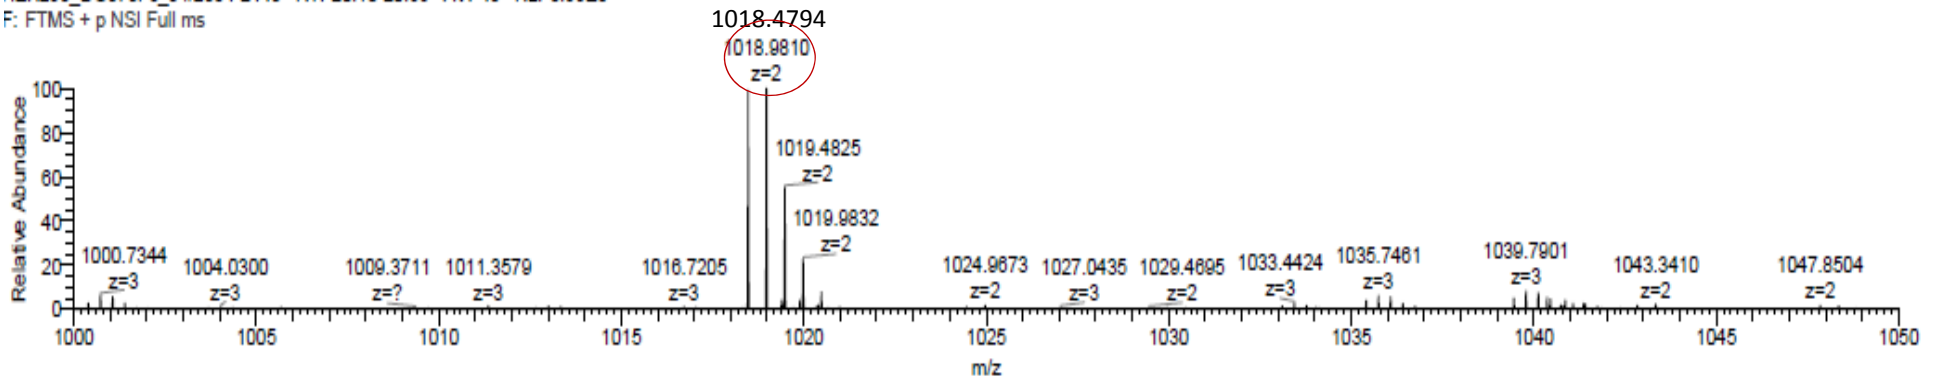

HEK293\_DG373Fc\_3 #2375 RT: 20.30 AV: 1 NL: 5.36E4  
T: FTMS + p NSI d Full ms2 1018.4795@hcd28.00 [120.0000-2000.0000]

MS<sup>2</sup>  
HCD

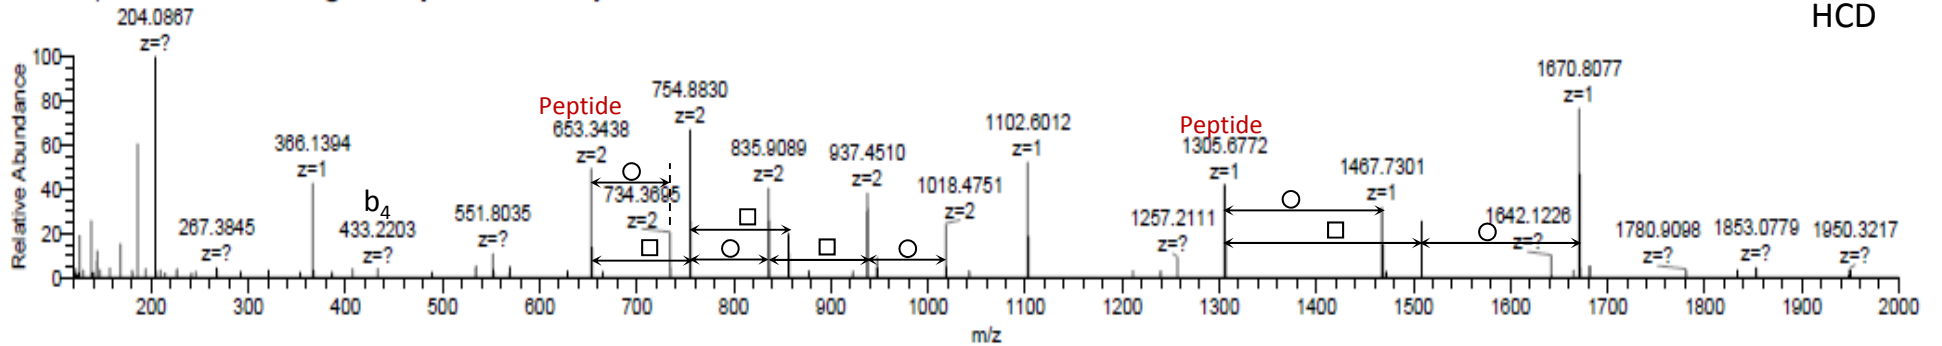

HEK293\_DG373Fc\_3 #2376 RT: 20.30 AV: 1 NL: 5.01E3  
T: ITMS + c NSI r d Full ms2 1018.4795@cid30.00 [275.0000-2000.0000]

MS<sup>2</sup>  
CID

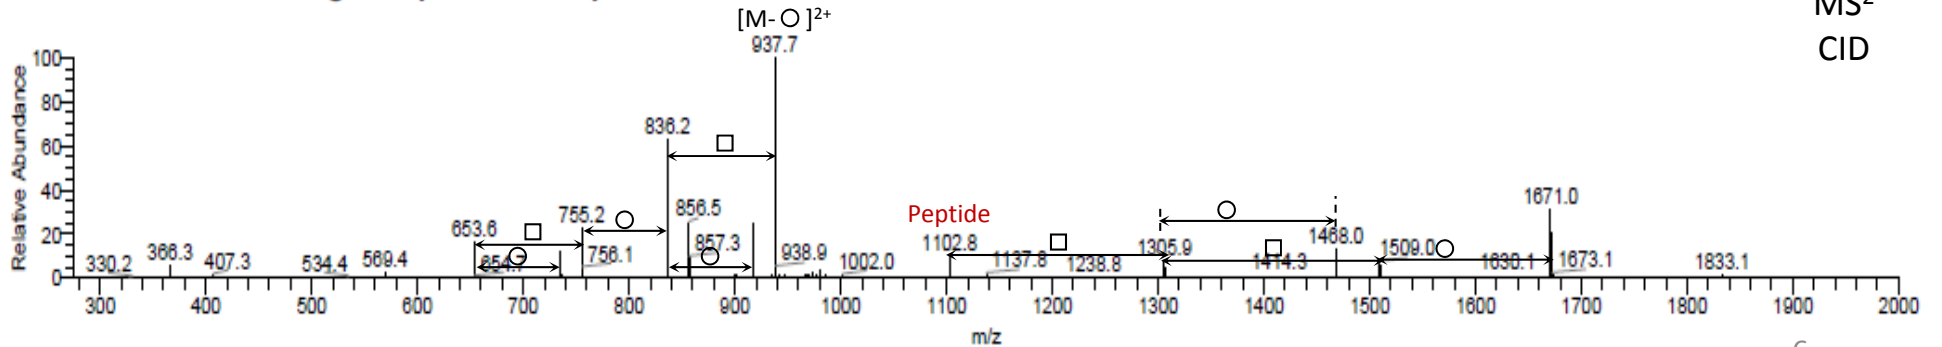

# HCT116-WT<sub>pyr</sub>QIHA**T**PT**P**VR + Hex<sub>1</sub>HexNAc<sub>1</sub>NeuAc<sub>2</sub>

HCT116\_aDG\_Fc\_WT\_2#11393-11554 RT: 31.91-32.16 AV: 6 NL: 3.51E7  
F: FTMS + p NSI Full ms

MS

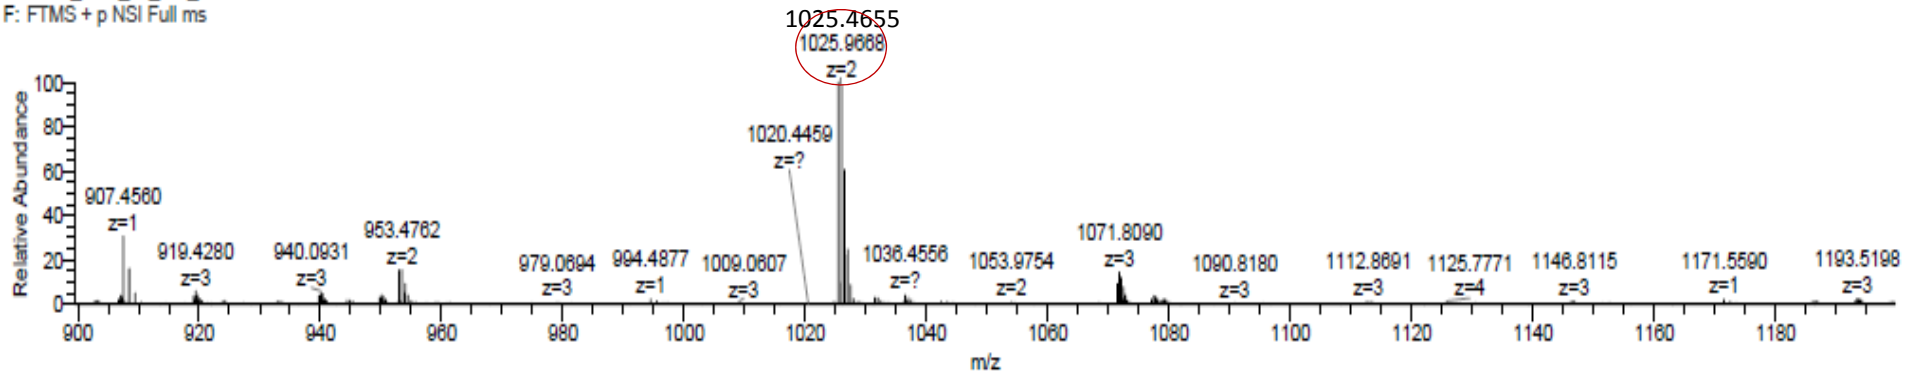

HCT116\_aDG\_Fc\_WT\_2#11399 RT: 31.92 AV: 1 NL: 1.87E6  
T: FTMS + p NSI d Full ms2 1025.9672@hod28.00 [120.0000-2000.0000]

MS<sup>2</sup>  
HCD

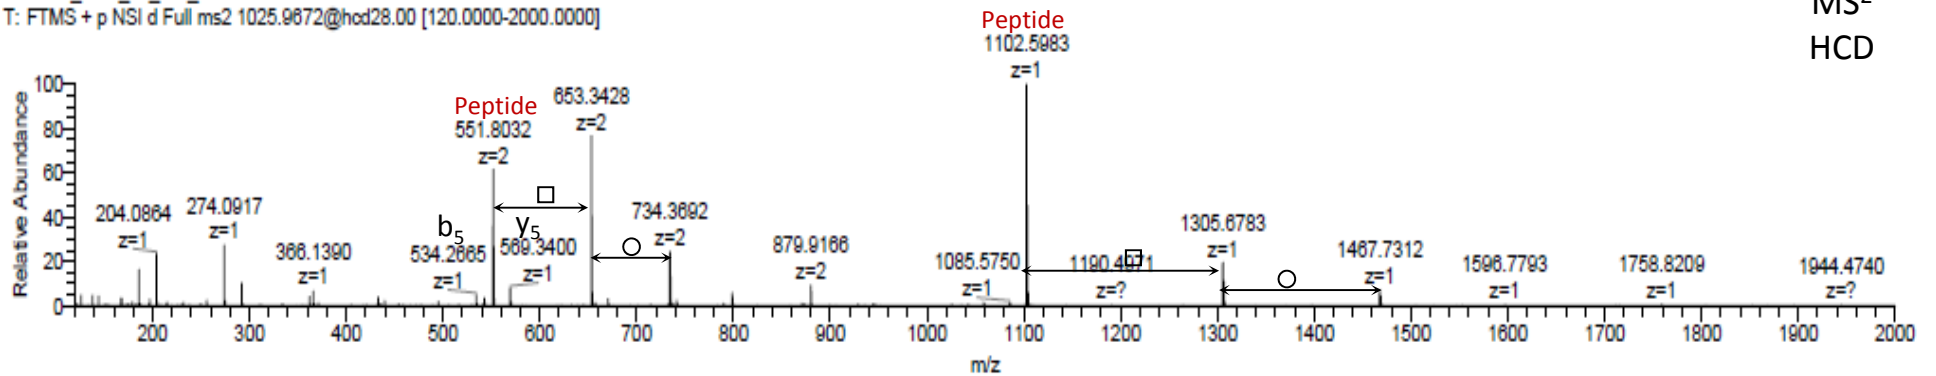

HCT116\_aDG\_Fc\_WT\_2#11401 RT: 31.92 AV: 1 NL: 1.78E5  
T: ITMS + c NSI r d Full ms2 1025.9672@cid30.00 [277.0000-2000.0000]

MS<sup>2</sup>  
CID

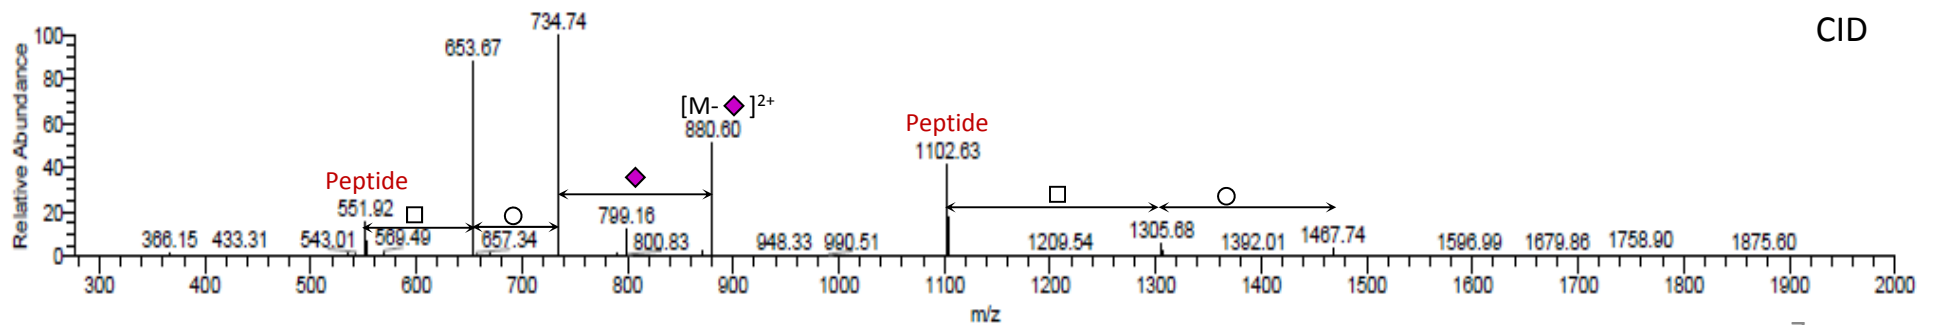

# HEK293-WT<sub>pyr</sub>QIHA**TTP**VR + Hex<sub>2</sub>HexNAC<sub>2</sub>NeuAc<sub>1</sub>

MS

HEK293\_DG373Fc\_3 #4032-4303 RT: 25.48-26.43 AV: 75 NL: 7.99E8  
F: FTMS + p NSI Full ms

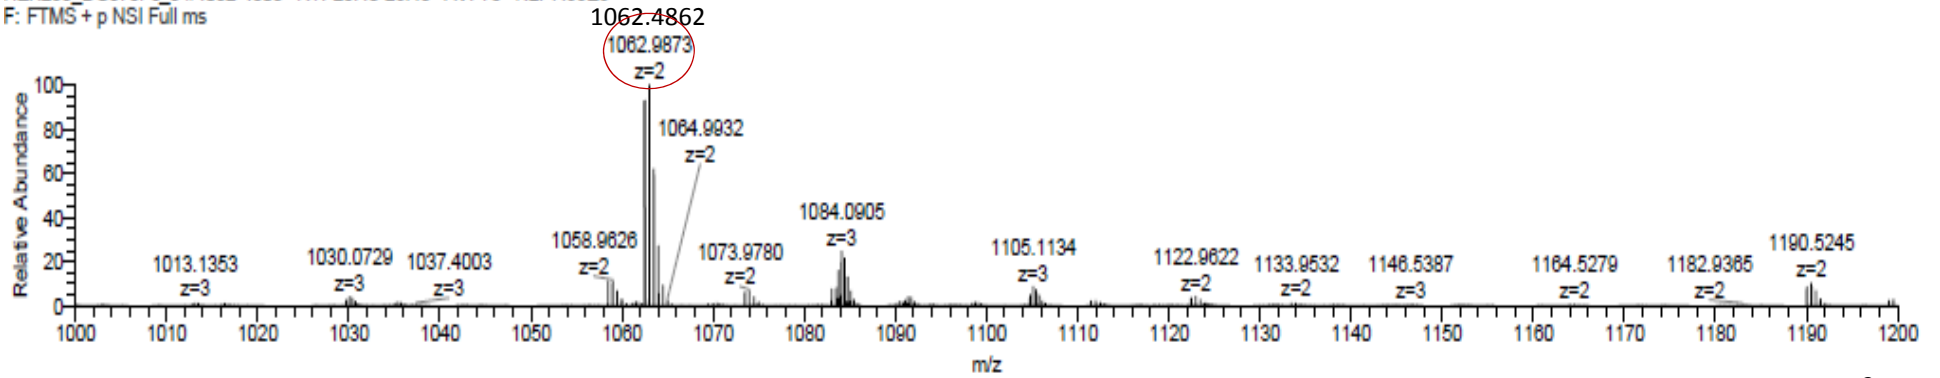

HEK293\_DG373Fc\_3 #3950 RT: 25.17 AV: 1 NL: 1.82E5  
T: FTMS + p NSI d Full ms2 1062.9927@hcd28.00 [120.0000-2000.0000]

MS<sup>2</sup>  
HCD

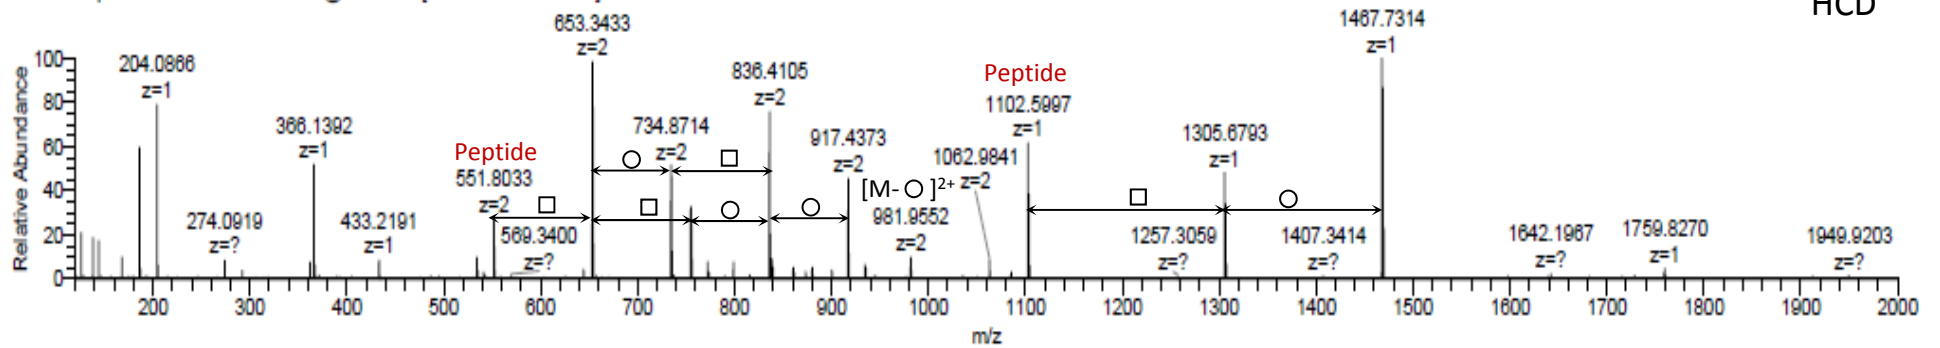

HEK293\_DG373Fc\_3 #3951 RT: 25.18 AV: 1 NL: 2.35E4  
T: ITMS + c NSI r d Full ms2 1062.9927@cid30.00 [287.0000-2000.0000]

MS<sup>2</sup>  
CID

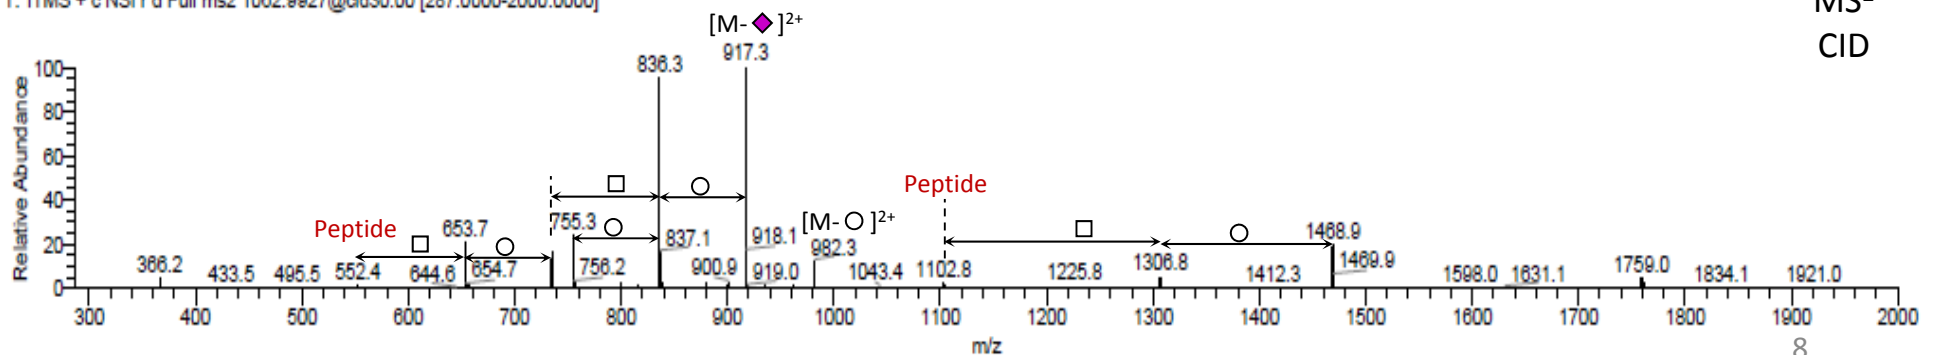



# HEK293-WT<sub>pyr</sub>QIHATPVPV + Hex<sub>4</sub>HexNAC<sub>2</sub>

MS

HEK293\_DG373Fc\_3#3319 RT: 23.14 AV: 1 NL: 1.85E6  
F: FTMS + p NSI Full ms

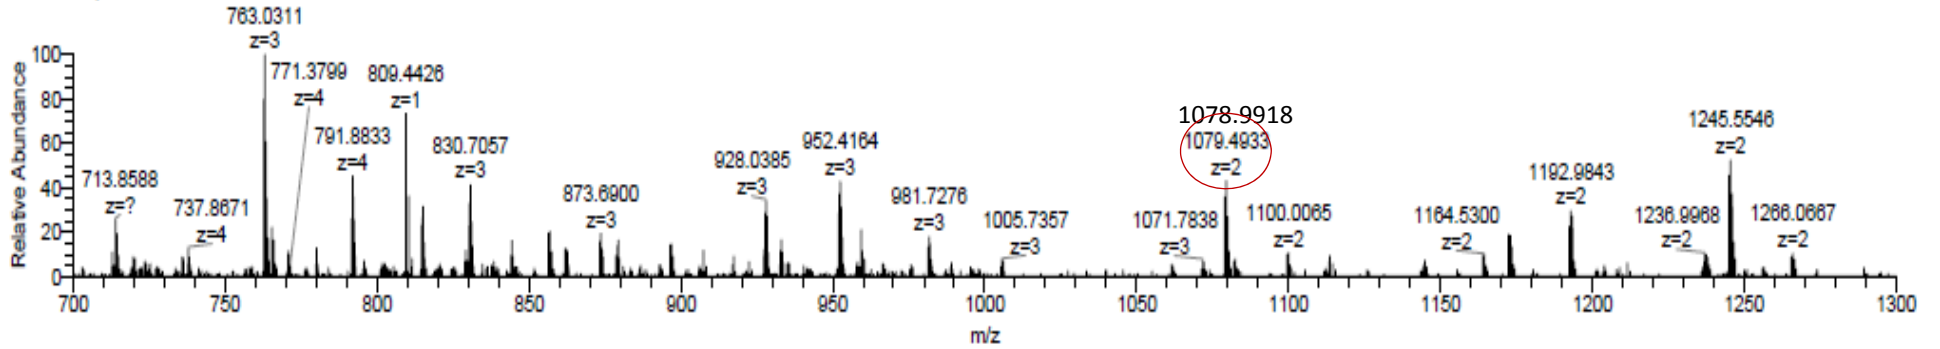

HEK293\_DG373Fc\_3#3320 RT: 23.14 AV: 1 NL: 3.76E4  
T: FTMS + p NSI d Full ms2 1078.9911@hcd28.00 [120.0000-2000.0000]

MS<sup>2</sup>  
HCD

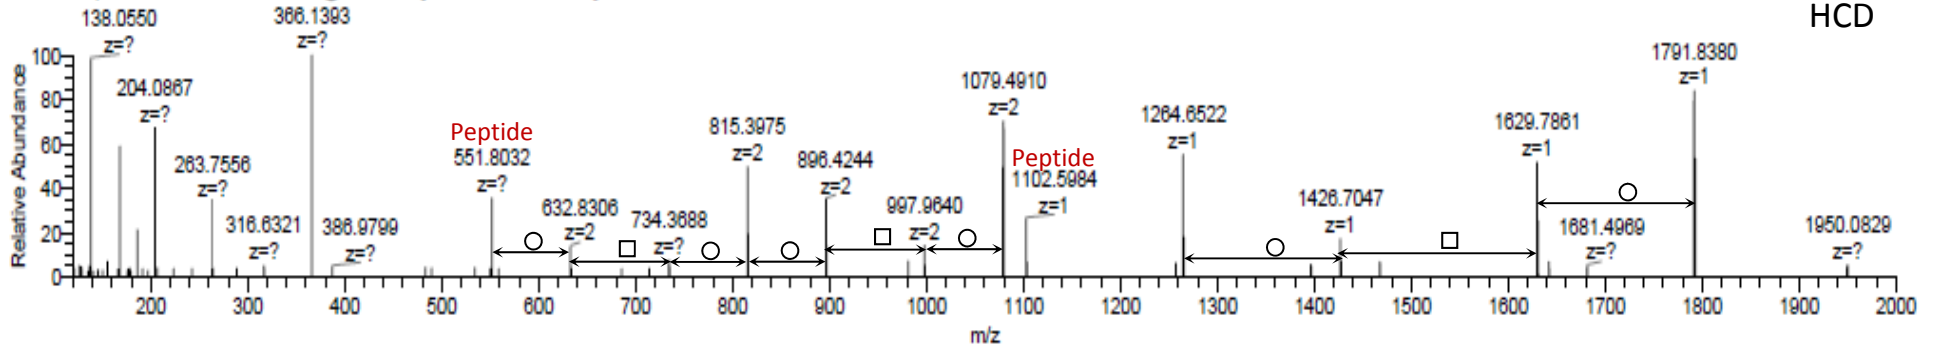

HEK293\_DG373Fc\_3#3323 RT: 23.15 AV: 1 NL: 1.77E3  
T: ITMS + c NSI rd Full ms2 1078.9911@cid30.00 [292.0000-2000.0000]

MS<sup>2</sup>  
CID

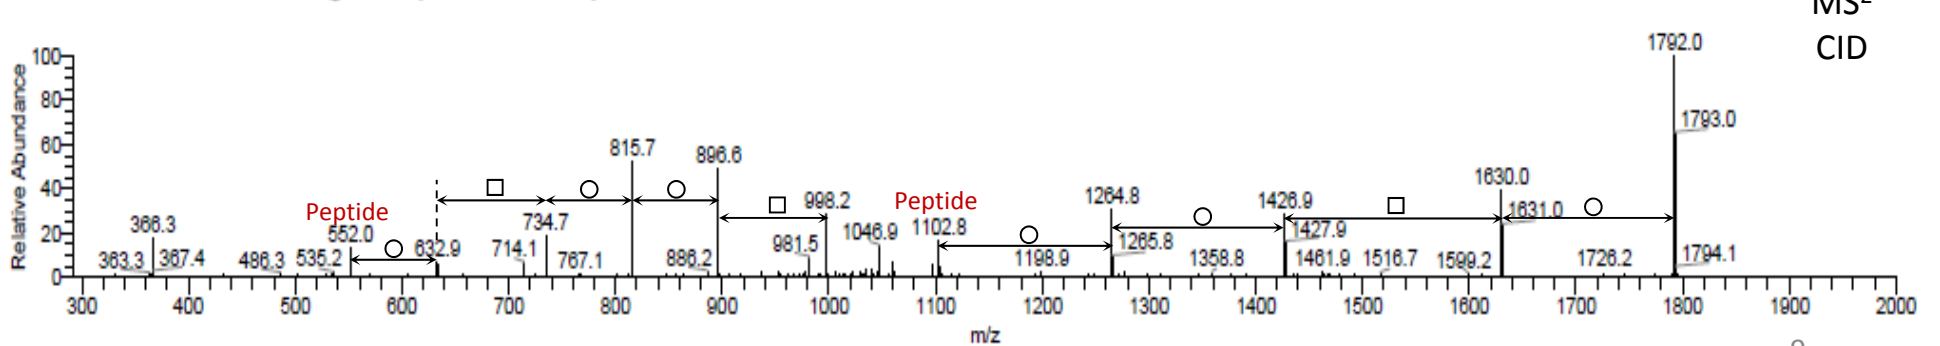

# HEK293-WT<sub>pyr</sub>QIHA<sup>T</sup>TPVR + Hex<sub>1</sub>HexNAC<sub>3</sub>NeuAc<sub>1</sub>

MS

HEK293\_DG373Fc\_3 #4380-4754 RT: 26.72-27.70 AV: 61 NL: 9.50E5  
F: FTMS + p NSI Full ms

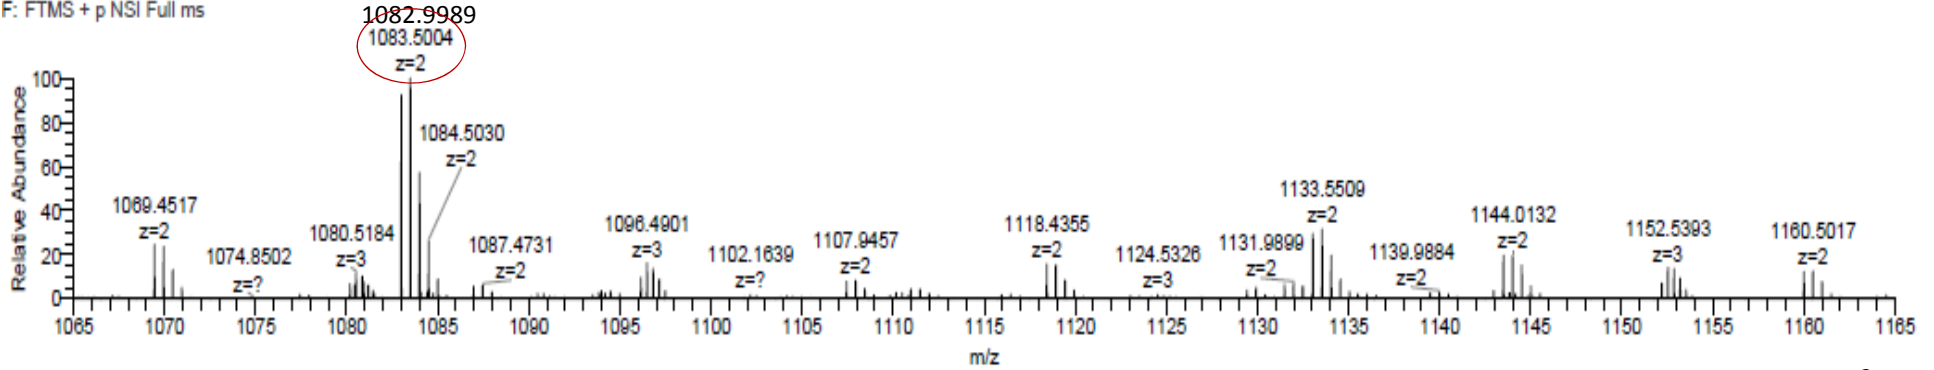

HEK293\_DG373Fc\_3 #4419 RT: 26.86 AV: 1 NL: 6.32E4  
T: FTMS + p NSI d Full ms2 1083.5002@hcd28.00 [120.0000-2000.0000]

MS<sup>2</sup>  
HCD

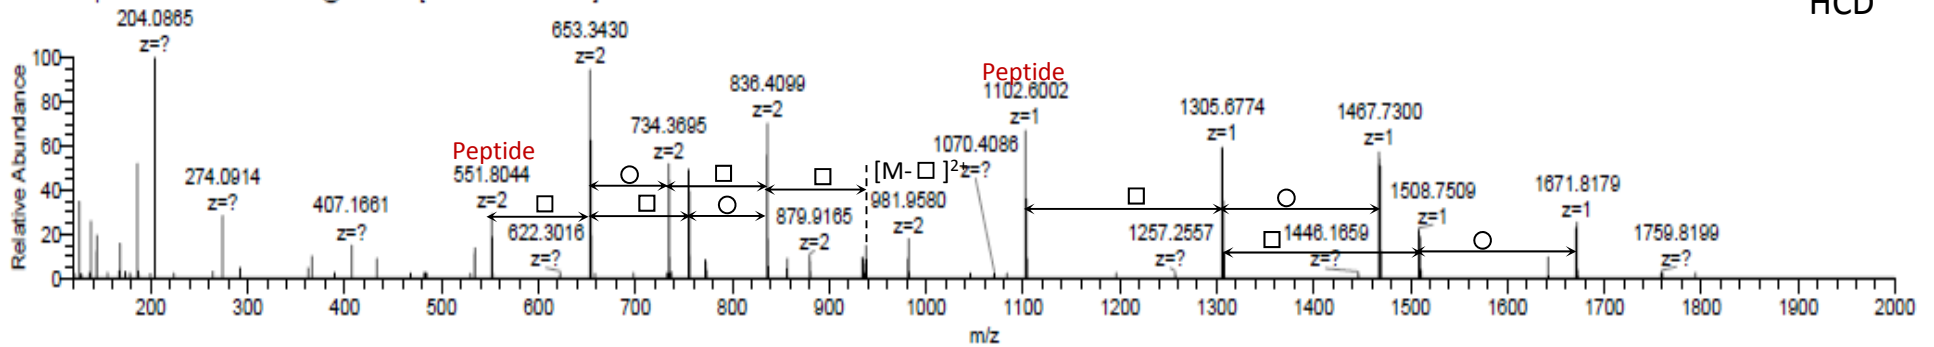

HEK293\_DG373Fc\_3 #4421 RT: 26.86 AV: 1 NL: 8.79E3  
T: ITMS + c NSI r d Full ms2 1083.5002@cid30.00 [293.0000-2000.0000]

MS<sup>2</sup>  
CID

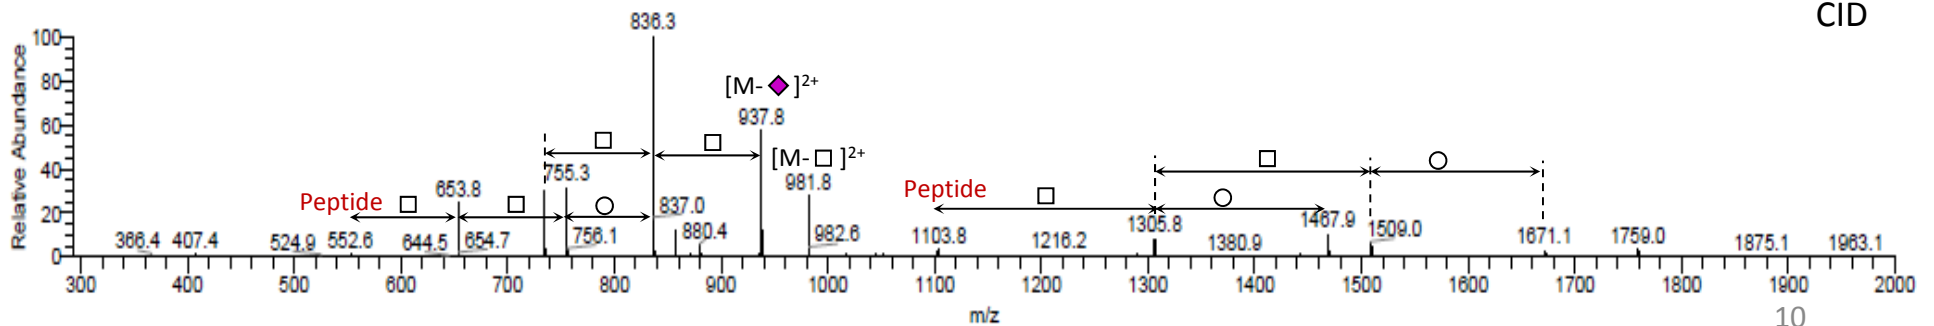

# HCT116-WT<sub>pyr</sub>QIHATTPVR + Hex<sub>3</sub>HexNAC<sub>3</sub>

HCT116\_aDG\_Fc\_WT\_2#3928-4101 RT: 19.30-19.55 AV: 6 NL: 5.20E6  
F: FTMS + p NSI Full ms

MS

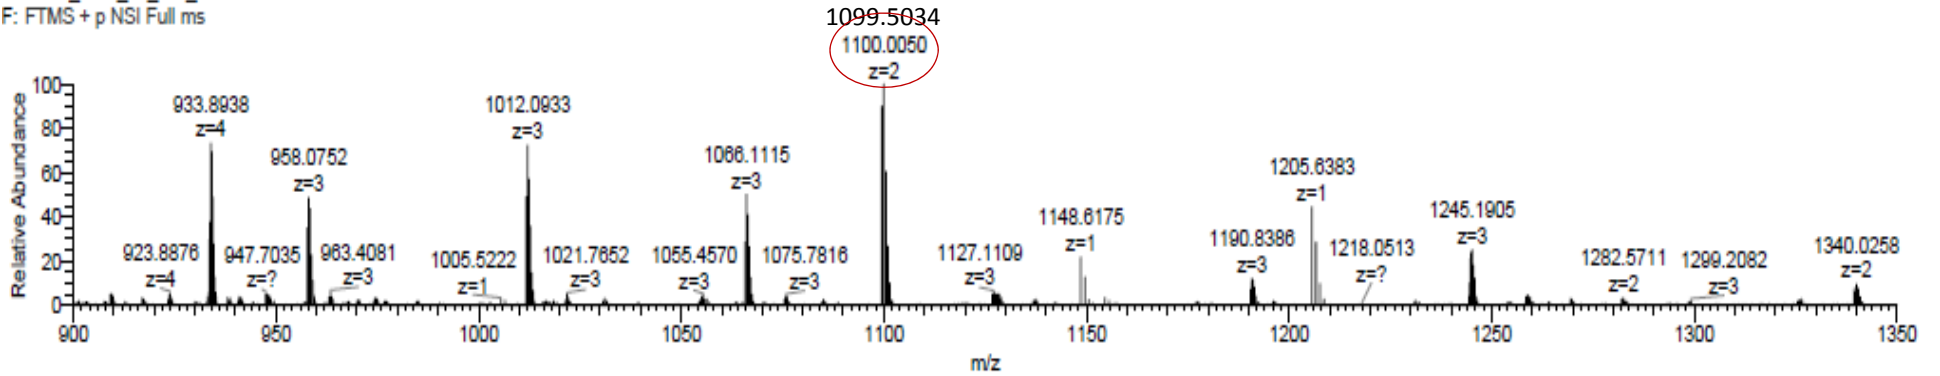

HCT116\_aDG\_Fc\_WT\_2#3964 RT: 19.35 AV: 1 NL: 3.02E5  
T: FTMS + p NSI d Full ms2 1099.5048@hcd28.00 [120.0000-2000.0000]

MS<sup>2</sup>  
HCD

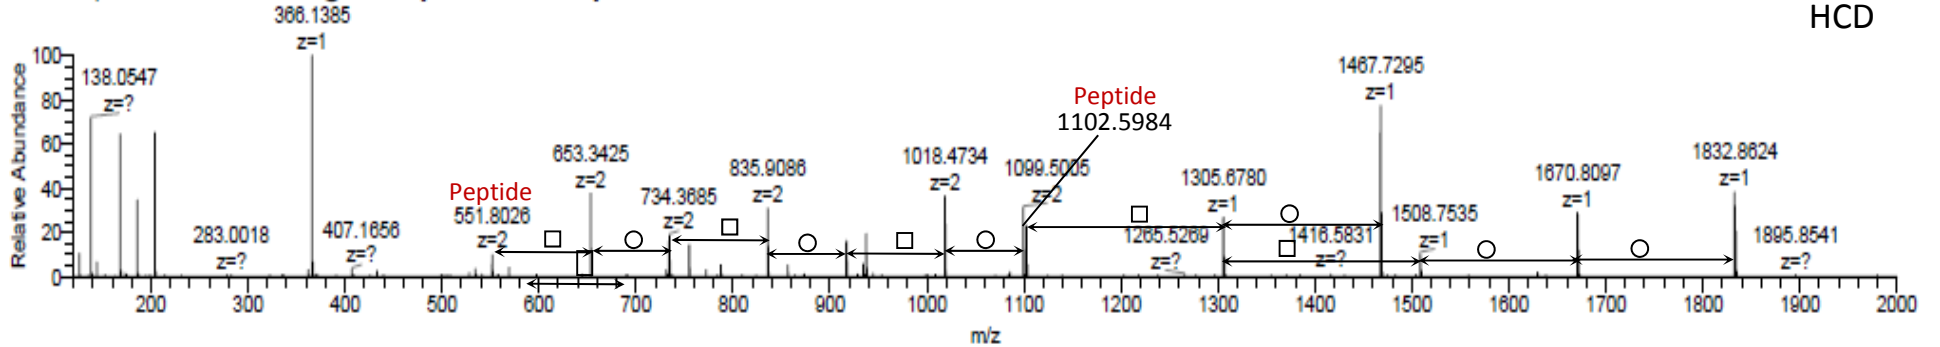

HCT116\_aDG\_Fc\_WT\_2#3969 RT: 19.36 AV: 1 NL: 2.23E4  
T: ITMS + c NSI r d Full ms2 1099.5048@cid30.00 [297.0000-2000.0000]

MS<sup>2</sup>  
CID

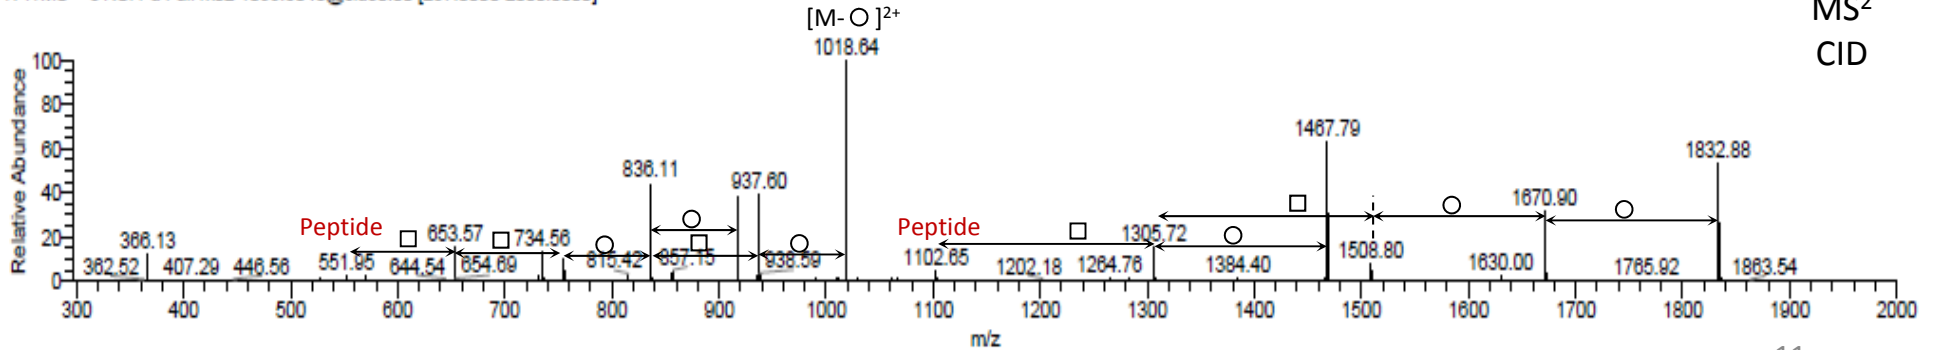

# HEK293-WT<sub>pyr</sub>QIHA**TTP**VR + Hex<sub>2</sub>HexNAC<sub>4</sub>

MS

HEK293\_DG373Fc\_3 #2363-2466 RT: 20.24-20.72 AV: 44 NL: 1.29E6  
F: FTMS + p NSI Full ms

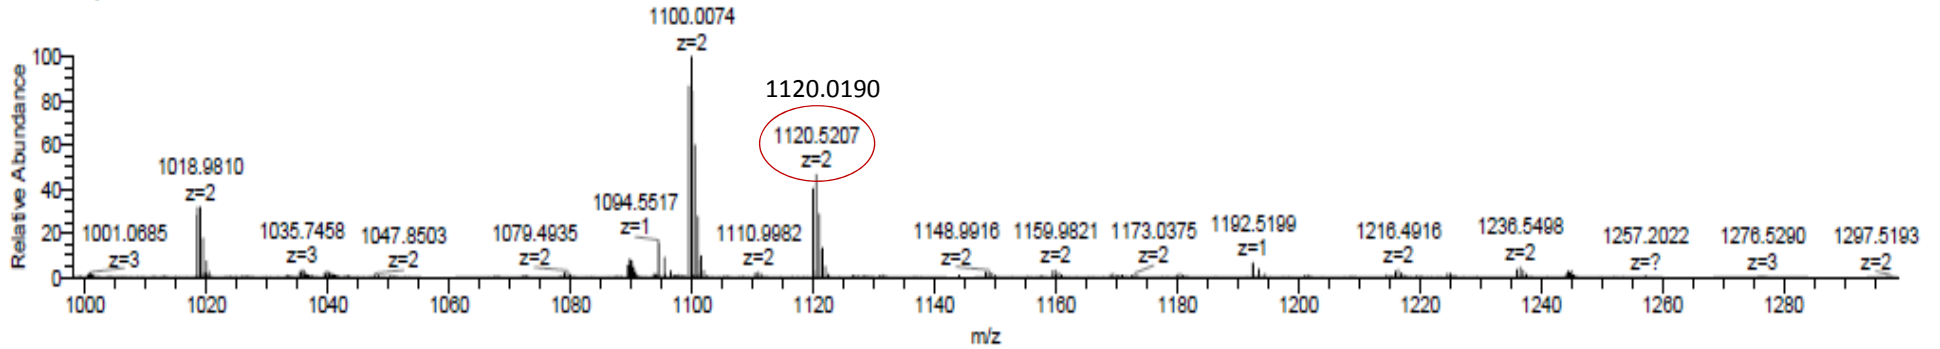

HEK293\_DG373Fc\_3 #2385 RT: 20.34 AV: 1 NL: 7.47E4  
T: FTMS + p NSI d Full ms2 1120.5209@hod28.00 [120.0000-2000.0000]

MS<sup>2</sup>  
HCD

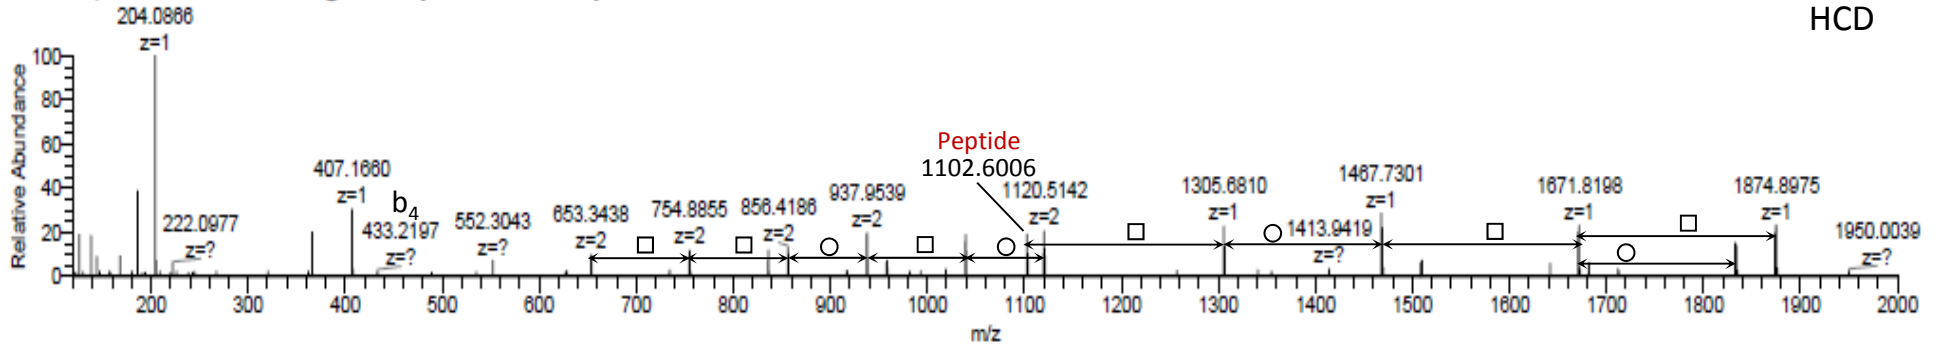

HEK293\_DG373Fc\_3 #2386 RT: 20.34 AV: 1 NL: 2.80E3  
T: ITMS + c NSI r d Full ms2 1120.5209@cid30.00 [303.0000-2000.0000]

MS<sup>2</sup>  
CID

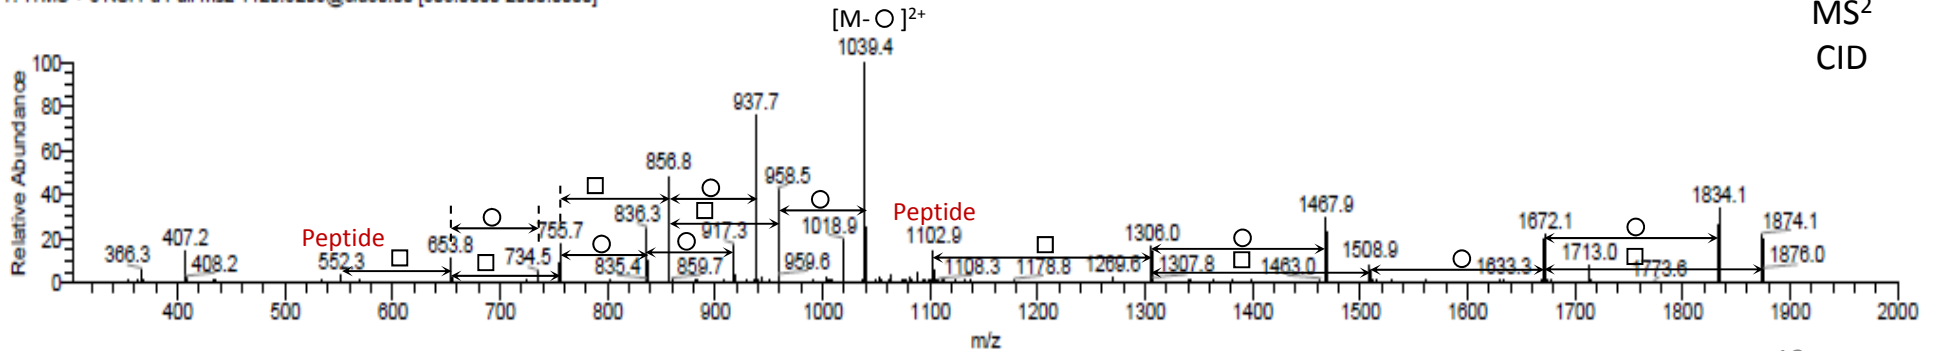

# HEK293-WT<sub>pyr</sub>QIHA<sup>T</sup>TPVR + Hex<sub>2</sub>HexNAC<sub>2</sub>NeuAc<sub>2</sub>

HEK293\_DG373Fc\_3 #5004-5334 RT: 28.44-29.29 AV: 51 NL: 7.91E8  
F: FTMS + p NSI Full ms

MS

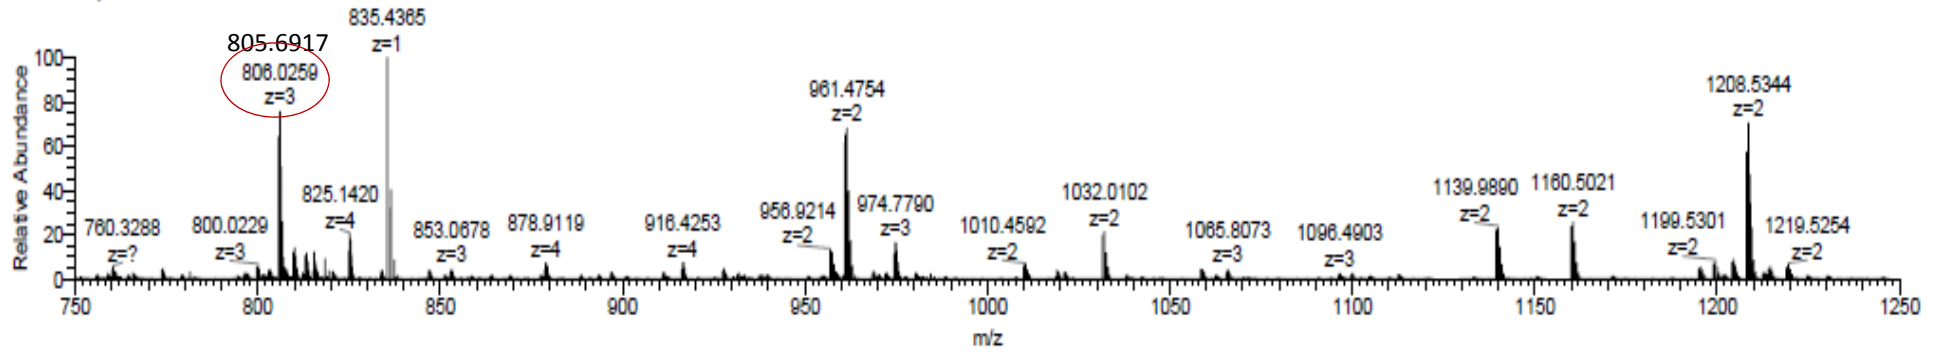

HEK293\_DG373Fc\_3 #5278 RT: 29.14 AV: 1 NL: 8.04E4  
T: FTMS + p NSI d Full ms2 805.6913@hed28.00 [120.0000-2000.0000]

MS<sup>2</sup>  
HCD

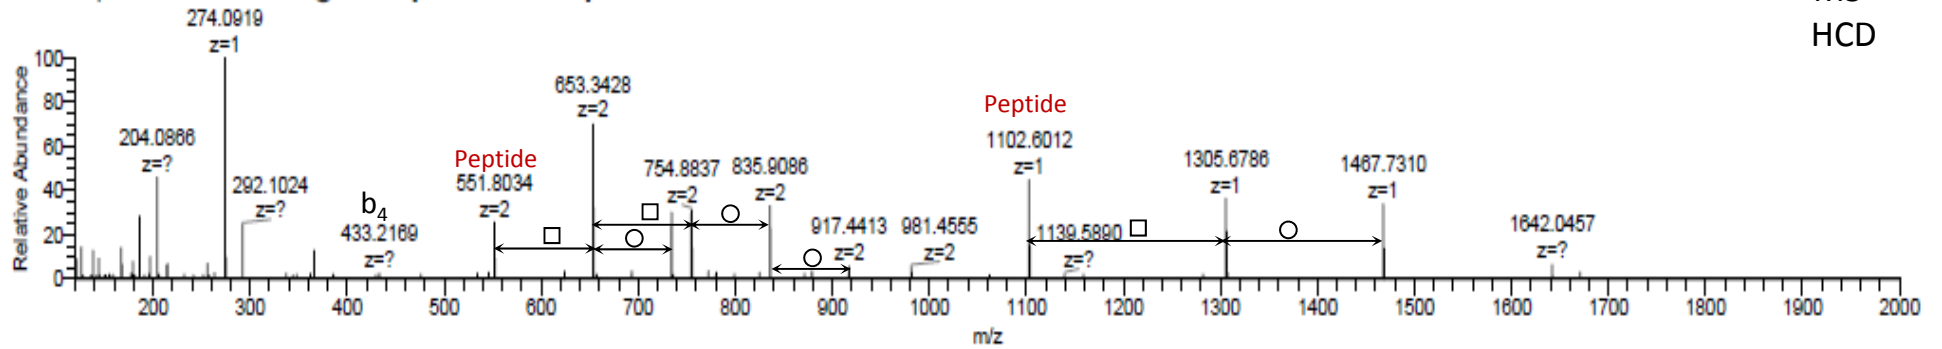

HEK293\_DG373Fc\_3 #5280 RT: 29.15 AV: 1 NL: 6.43E3  
T: ITMS + c NSI r d Full ms2 805.6913@cid30.00 [216.0000-2000.0000]

MS<sup>2</sup>  
CID

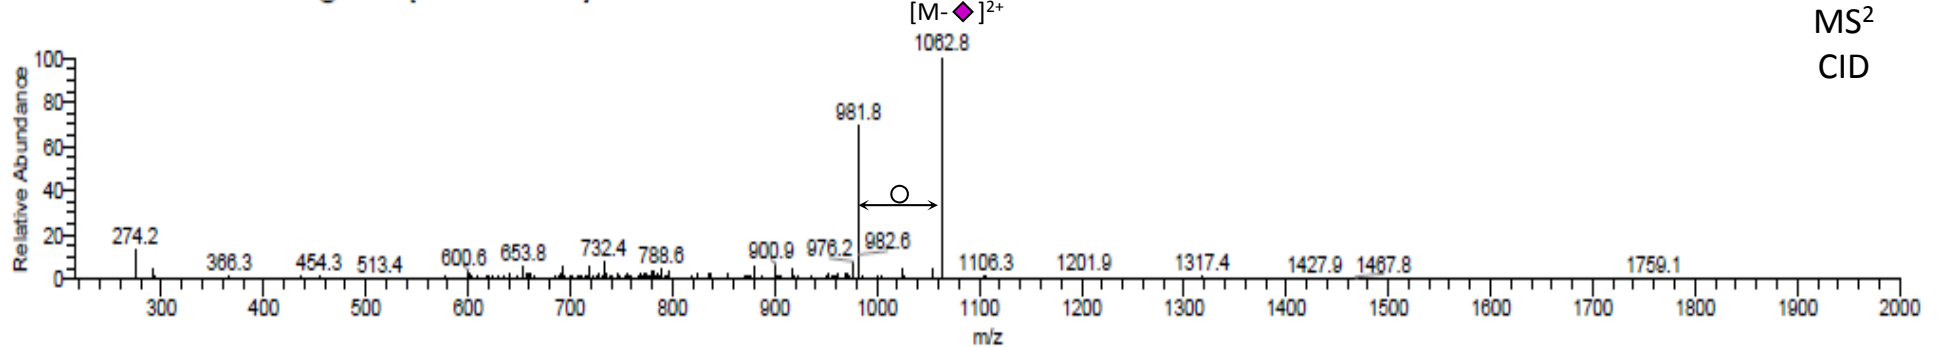

# HEK293-WT<sub>pyr</sub>QIHATTPVR + Hex<sub>3</sub>HexNAC<sub>3</sub>NeuAc<sub>1</sub>

HEK293\_DG373Fc\_3 #3418-3674 RT: 23.50-24.41 AV: 78 NL: 1.42E8  
 F: FTMS + p NSI Full ms

MS

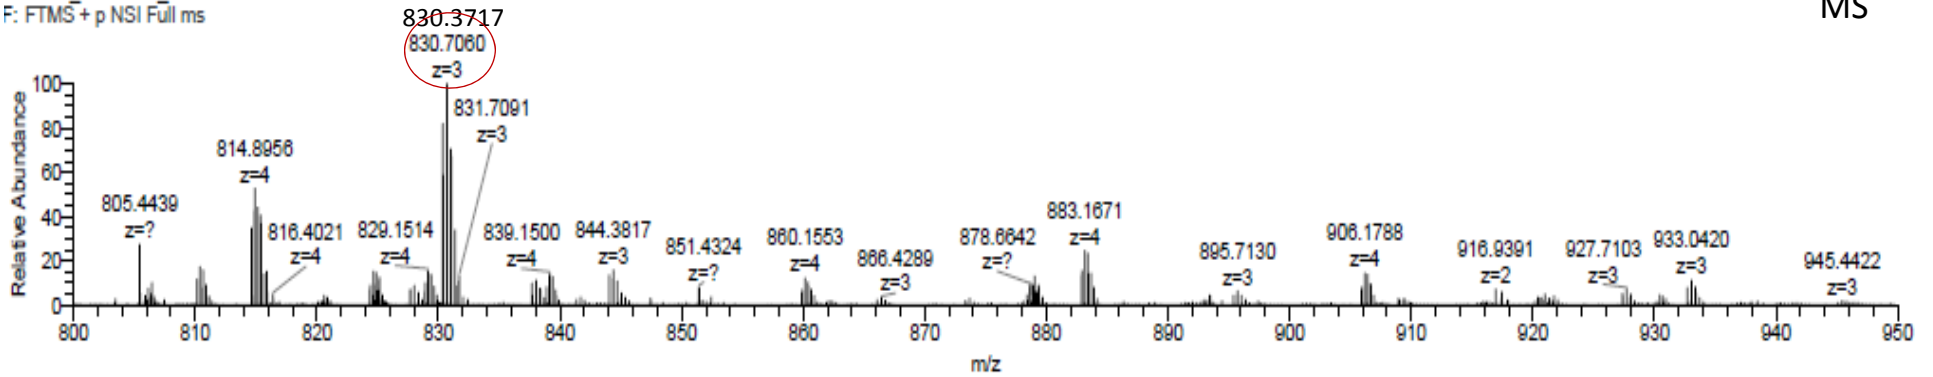

HEK293\_DG373Fc\_3 #3456 RT: 23.63 AV: 1 NL: 9.63E4  
 T: FTMS + p NSI d Full ms2 830.7063@hod28.00 [120.0000-2000.0000]

MS<sup>2</sup>  
 HCD

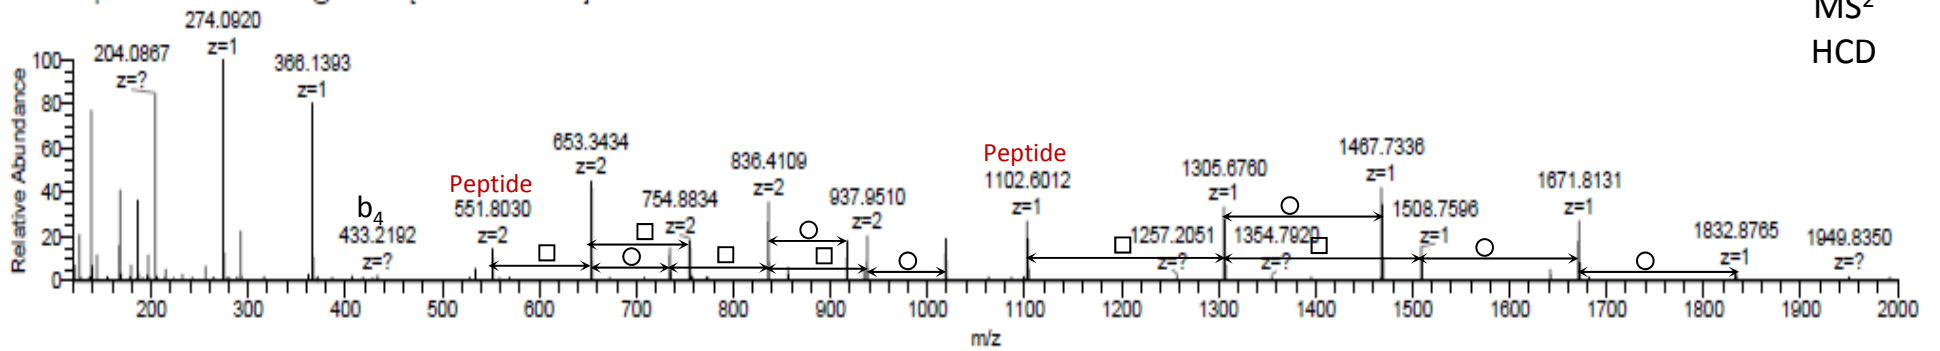

HEK293\_DG373Fc\_3 #3459 RT: 23.64 AV: 1 NL: 7.35E3  
 T: ITMS + c NSI r d Full ms2 830.7063@cid30.00 [223.0000-2001.0000]

MS<sup>2</sup>  
 CID

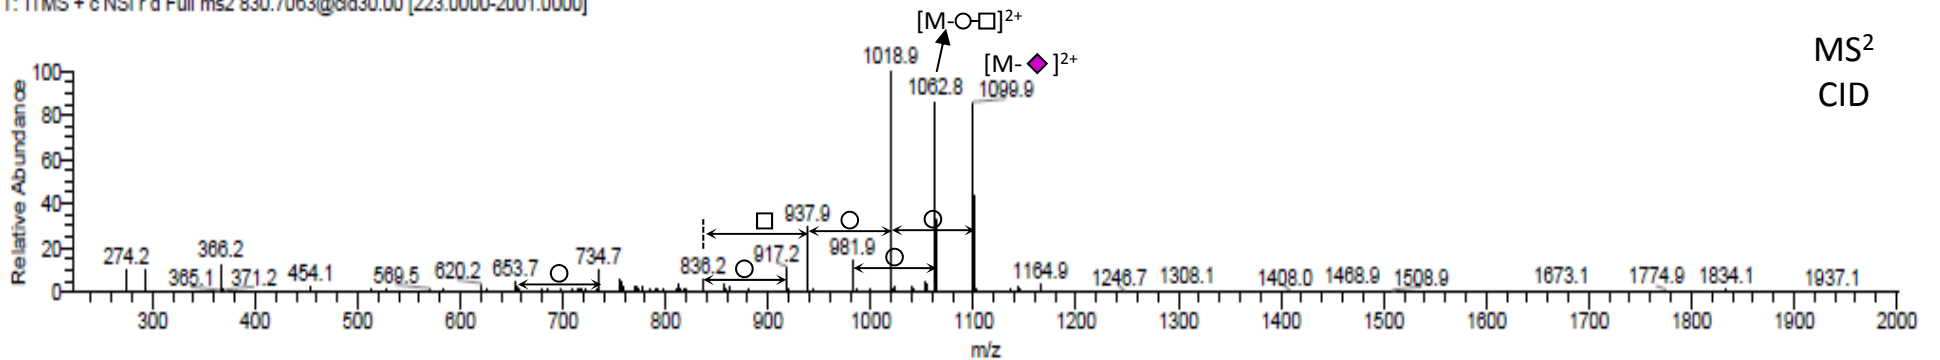

# HEK293-WT<sub>pyr</sub>QIHA**TTP**VR + Hex<sub>2</sub>HexNAC<sub>4</sub>NeuAc<sub>1</sub>

MS

HEK293\_DG373Fc\_3 #3606-3755 RT: 24.15-24.69 AV: 48 NL: 4.48E5  
 -: FTMS + p NSI Full ms

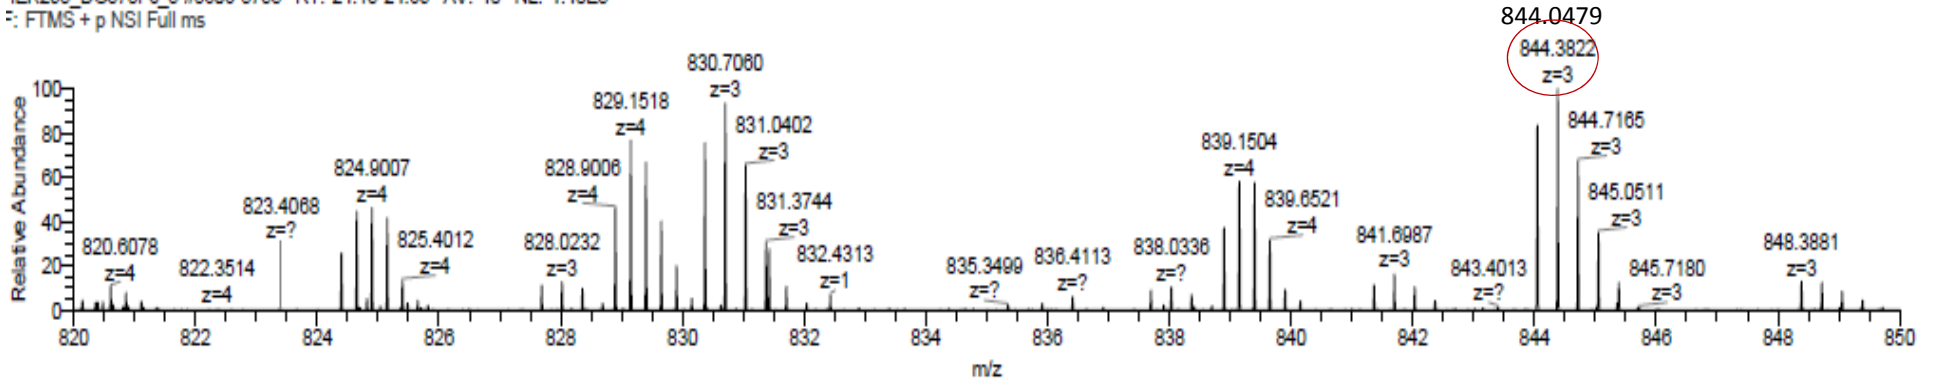

HEK293\_DG373Fc\_3 #3645 RT: 24.29 AV: 1 NL: 1.09E5  
 -: FTMS + p NSI d Full ms2 844.3816@hod28.00 [120.0000-2000.0000]

MS<sup>2</sup>  
HCD

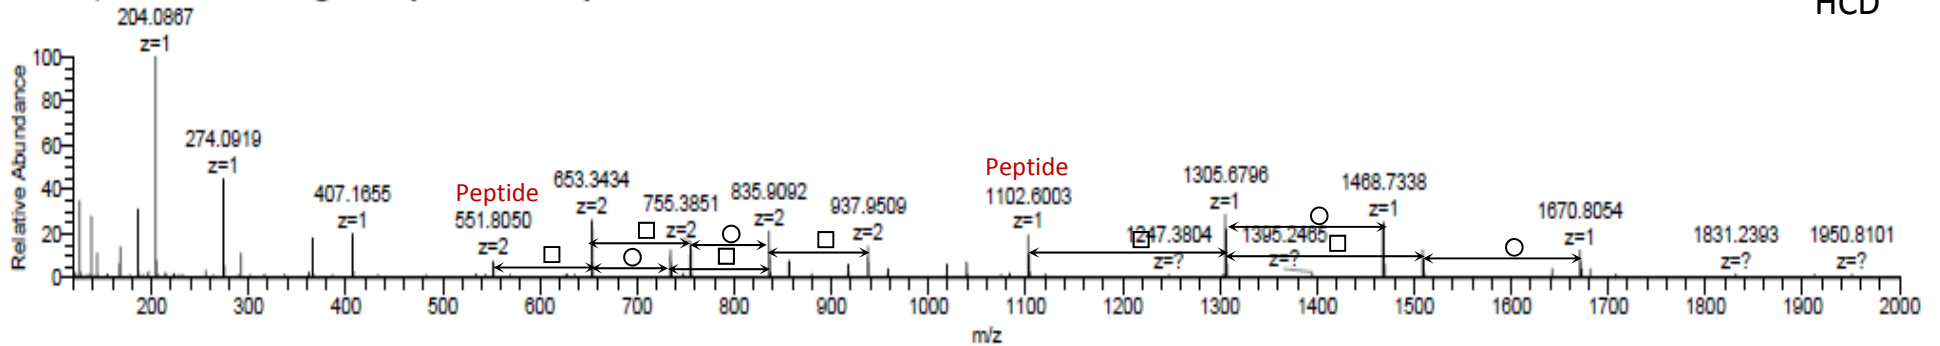

HEK293\_DG373Fc\_3 #3647 RT: 24.30 AV: 1 NL: 4.10E3  
 -: ITMS + c NSI r d Full ms2 844.3816@cid30.00 [227.0000-2000.0000]

MS<sup>2</sup>  
CID

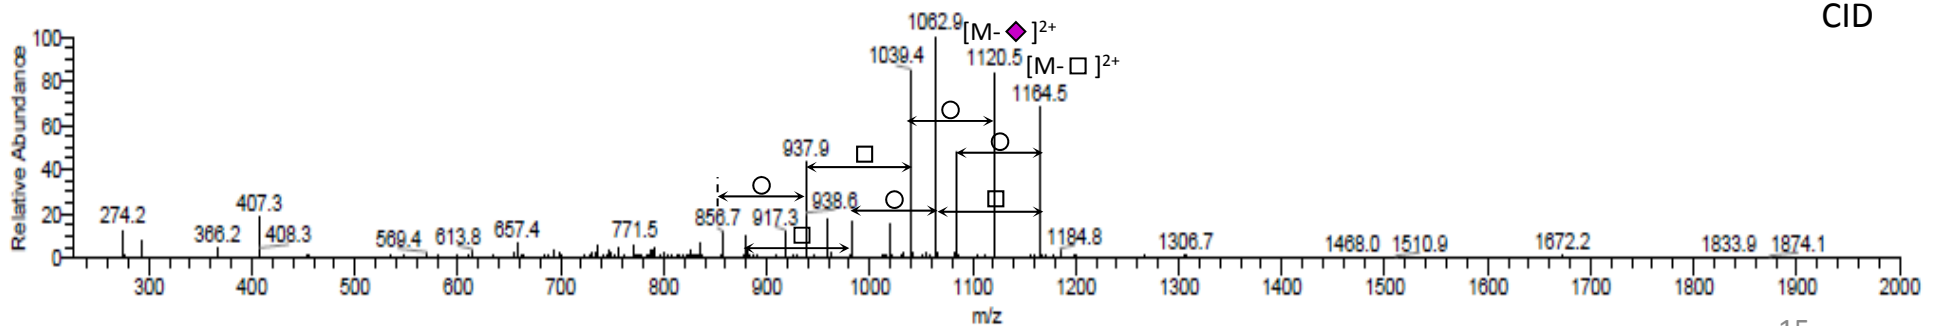

# HCT116-WT<sub>pyr</sub>QIHATPVPVR + Hex<sub>4</sub>HexNAC<sub>4</sub>

MS

HCT116\_aDG\_Fc\_WT\_2#3635-3889 RT: 18.80-19.20 AV: 9 NL: 6.59E8  
F: FTMS + p NSI Full ms

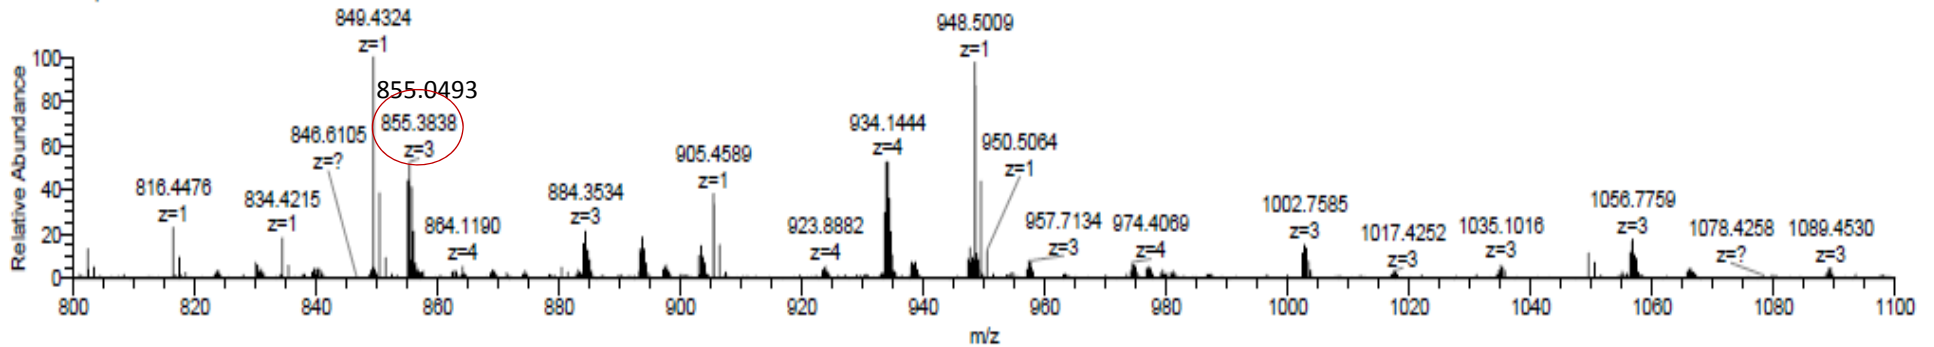

HCT116\_aDG\_Fc\_WT\_2#3673 RT: 18.86 AV: 1 NL: 3.16E5  
T: FTMS + p NSI d Full ms2 855.3835@hod28.00 [120.0000-2000.0000]

MS<sup>2</sup>  
HCD

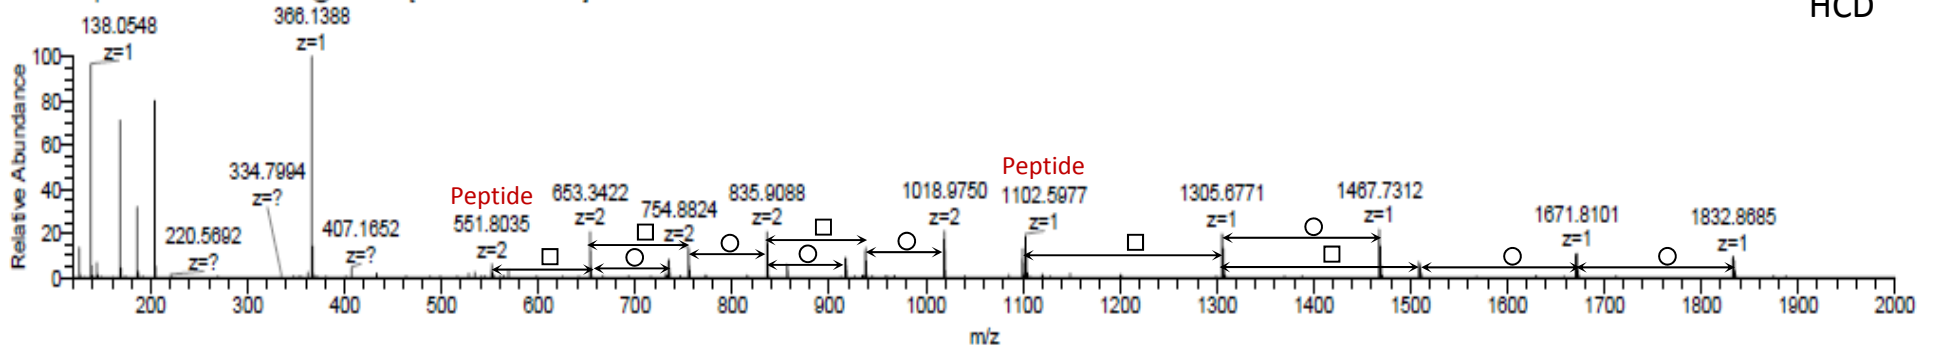

HCT116\_aDG\_Fc\_WT\_2#3676 RT: 18.87 AV: 1 NL: 5.51E4  
T: ITMS + c NSI r d Full ms2 855.3835@cid30.00 [230.0000-2000.0000]

MS<sup>2</sup>  
CID

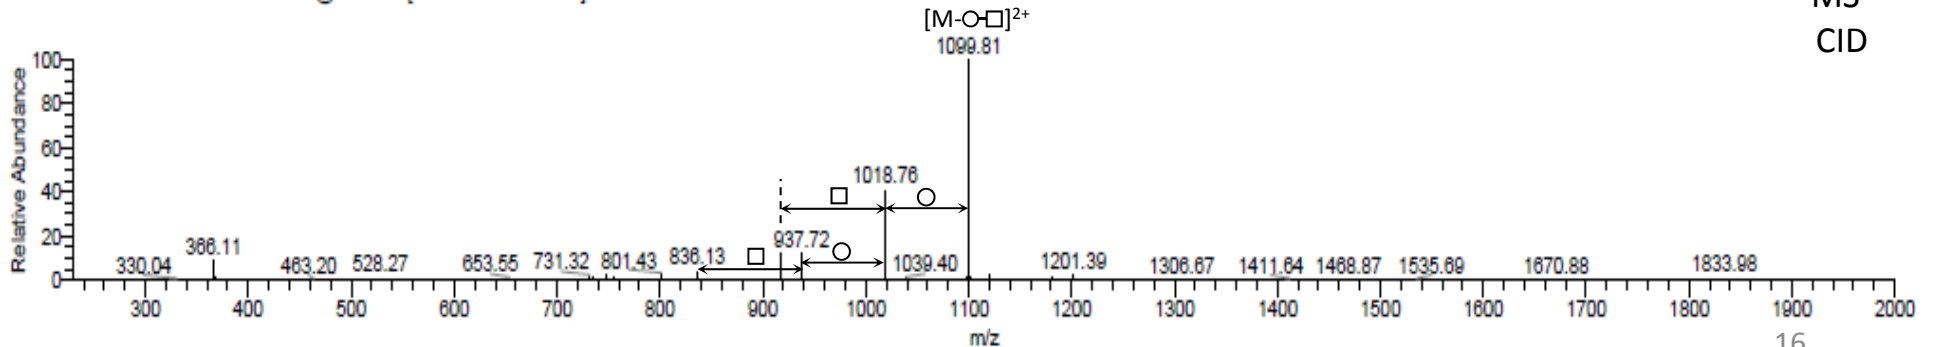



# HCT116-WT<sub>pyr</sub>QIHA**T**TPVR + Hex<sub>3</sub>HexNAC<sub>5</sub>

MS

HCT116\_aDG\_Fc\_WT\_2#3780-3901 RT: 19.05-19.25 AV: 5 NL: 2.22E6  
F: FTMS + p NSI Full ms

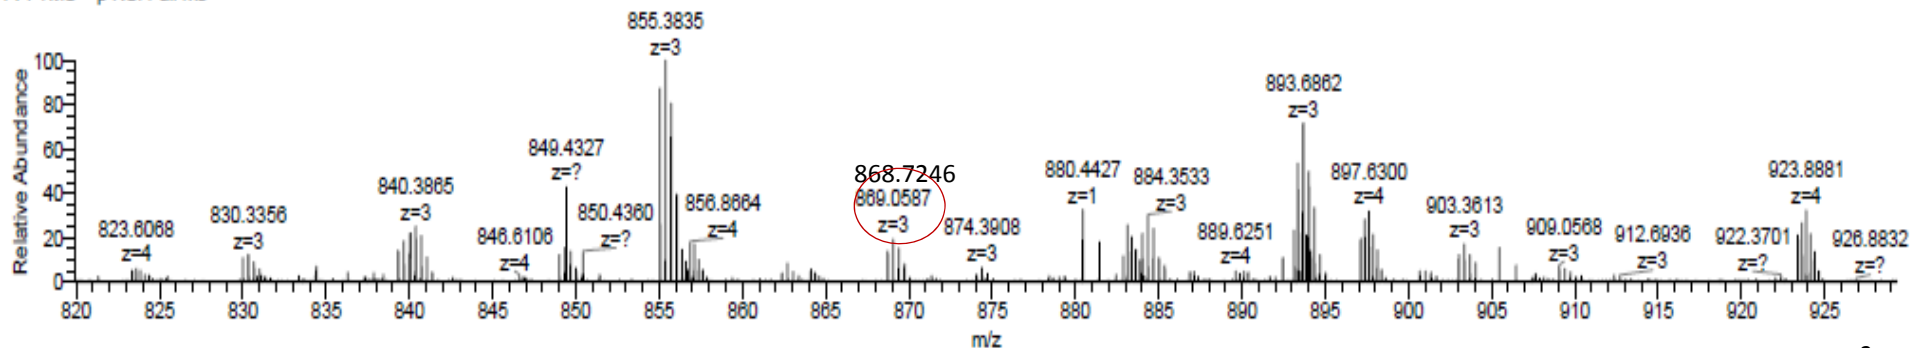

HCT116\_aDG\_Fc\_WT\_2#3883 RT: 19.19 AV: 1 NL: 1.70E5  
T: FTMS + p NSI d Full ms2 869.0589@hcd28.00 [120.0000-2000.0000]  
204.0883

MS<sup>2</sup>

HCD

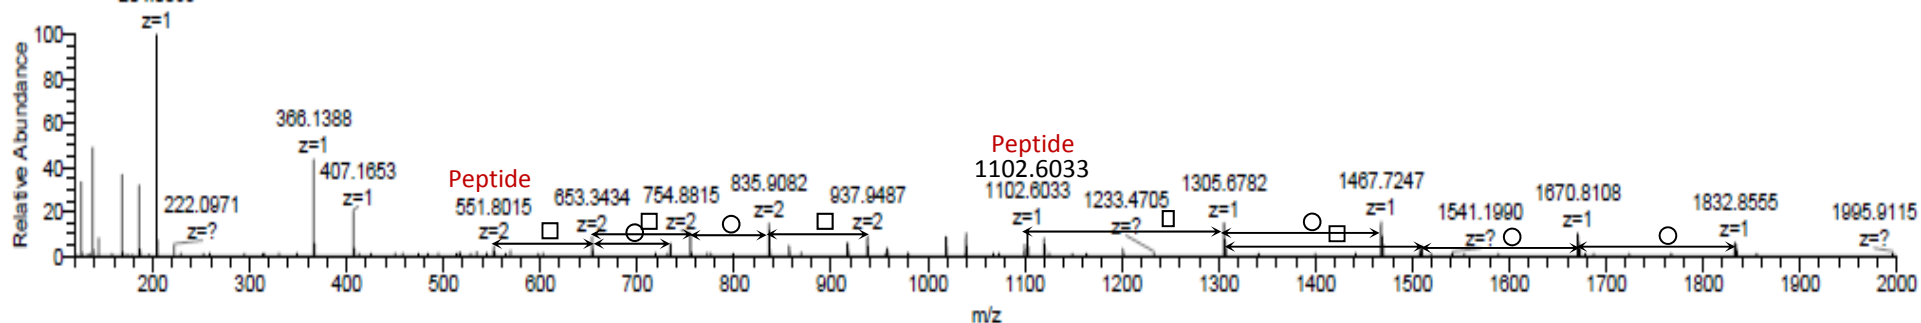

HCT116\_aDG\_Fc\_WT\_2#3886 RT: 19.19 AV: 1 NL: 1.21E4  
T: ITMS + c NSI r d Full ms2 869.0589@cid30.00 [234.0000-2000.0000]

MS<sup>2</sup>

CID

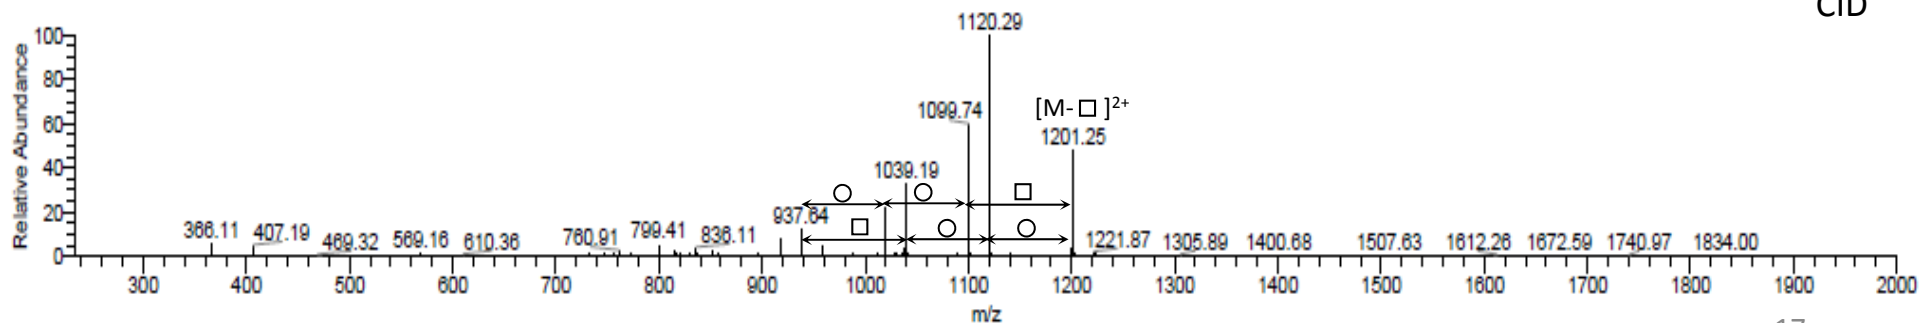

# HCT116-WT<sub>pyr</sub>QIHA**T**TPVR + Hex<sub>4</sub>HexNAC<sub>4</sub>NeuAc<sub>1</sub>

MS

HCT116\_aDG\_Fc\_WT\_2#5638-5980 RT: 22.07-22.63 AV: 12 NL: 1.12E7  
F: FTMS + p NSI Full ms

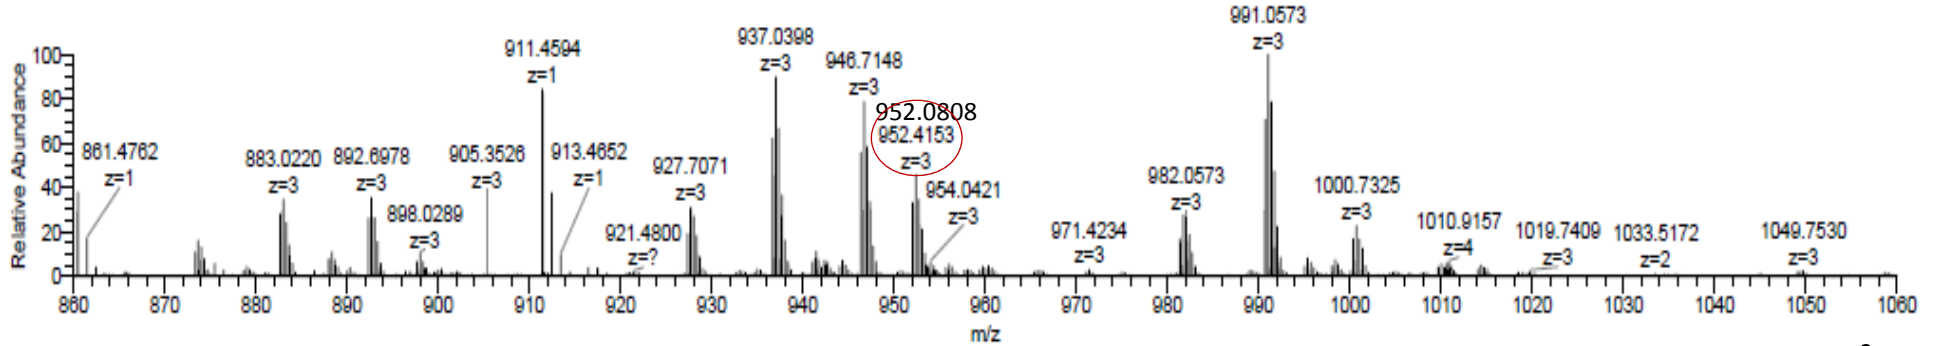

HCT116\_aDG\_Fc\_WT\_2#5704 RT: 22.18 AV: 1 NL: 5.84E5  
T: FTMS + p NSI d Full ms2 952.4139@hod28.00 [120.0000-2000.0000]

MS<sup>2</sup>  
HCD

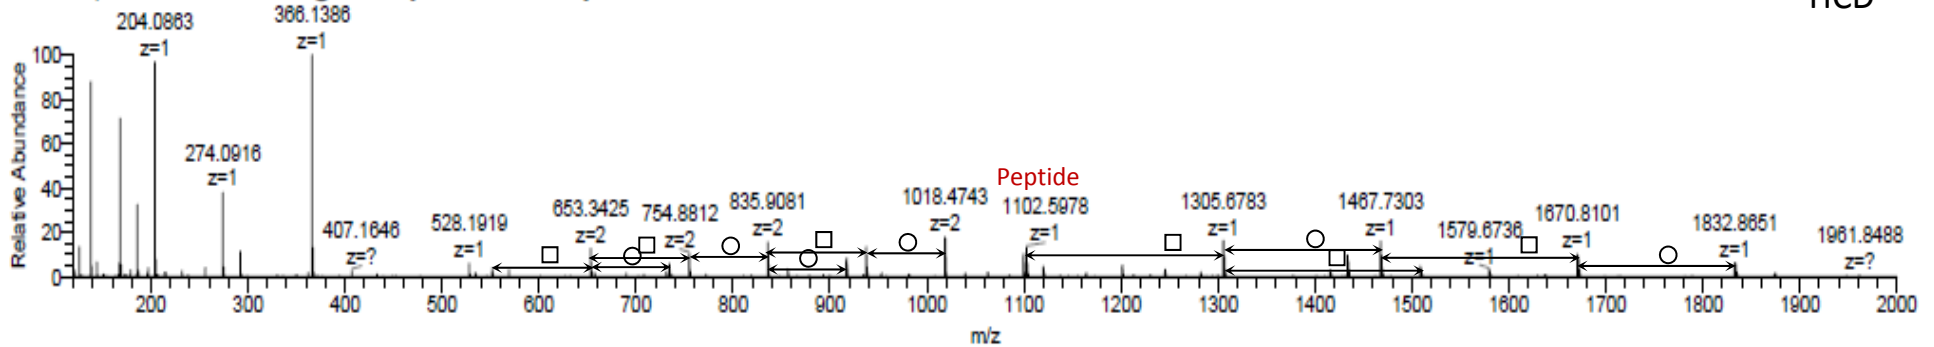

HCT116\_aDG\_Fc\_WT\_2#5707 RT: 22.18 AV: 1 NL: 7.09E4  
T: ITMS + c NSI r d Full ms2 952.4139@cid30.00 [257.0000-2000.0000]

MS<sup>2</sup>  
CID

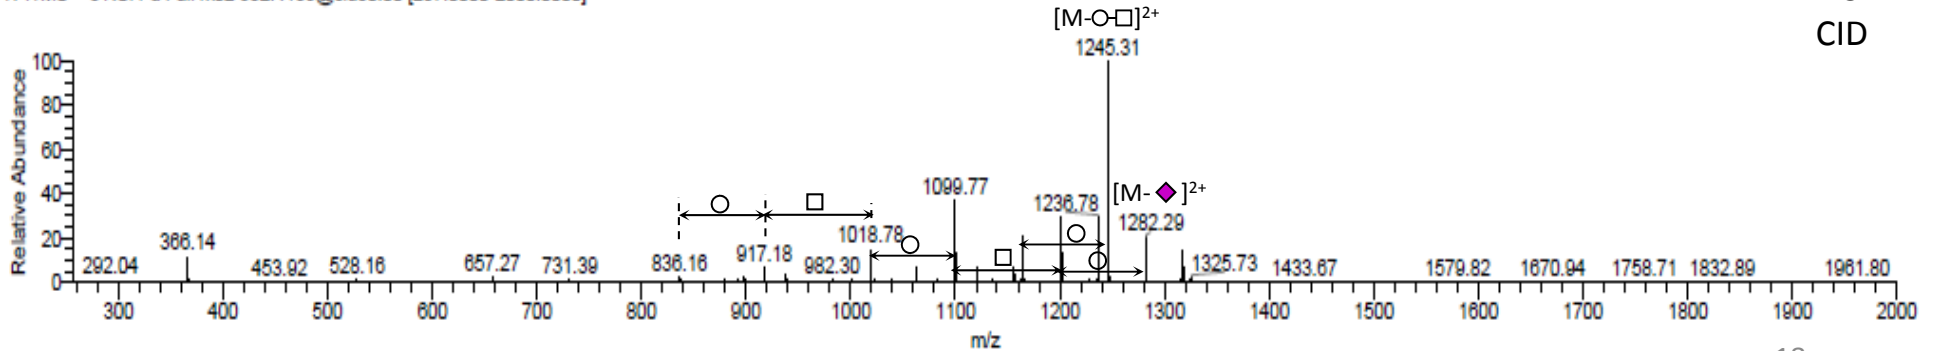

# HCT116-WT<sub>pyr</sub>QIHA**T**TPVR + Hex<sub>3</sub>HexNAc<sub>3</sub>NeuAc<sub>3</sub>

MS

HCT116\_aDG\_Fc\_WT#11855-12146 RT: 32.37-33.18 AV: 17 NL: 6.87E8  
F: FTMS + p NSI Full ms

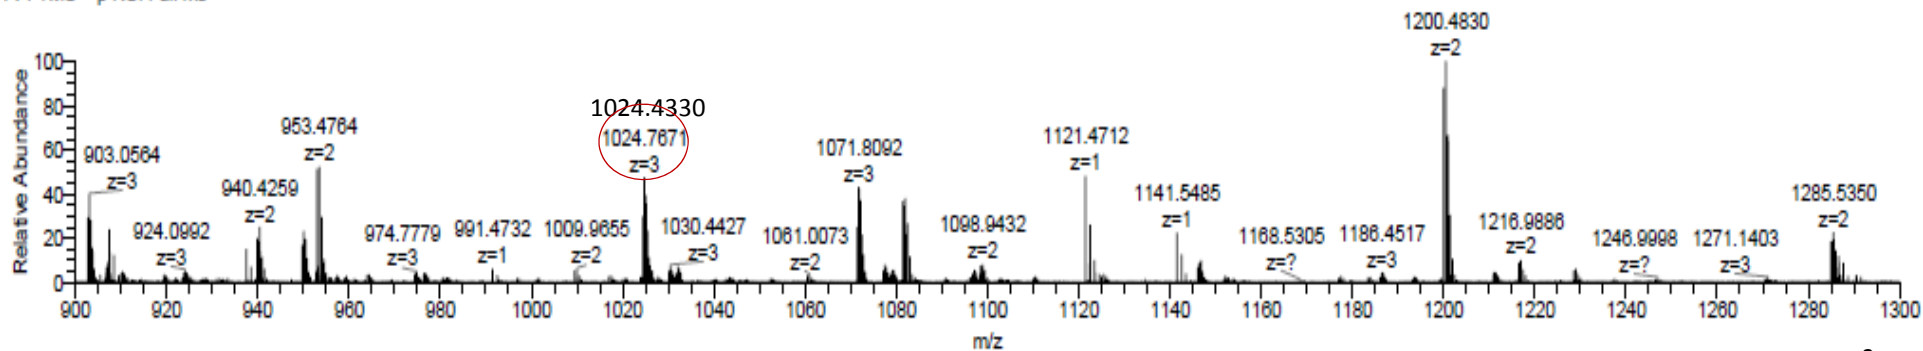

HCT116\_aDG\_Fc\_WT#11878 RT: 32.74 AV: 1 NL: 6.12E5  
T: FTMS + p NSI d Full ms2 1024.7673@hod28.00 [120.0000-2000.0000]

MS<sup>2</sup>

HCD

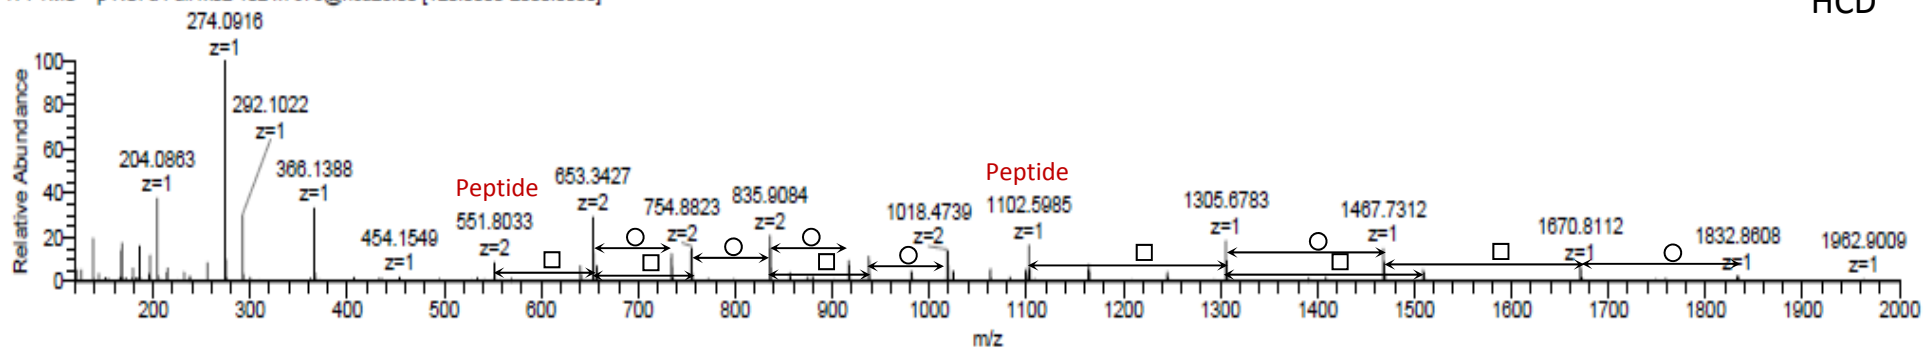

HCT116\_aDG\_Fc\_WT#11881 RT: 32.74 AV: 1 NL: 3.90E4  
T: ITMS + c NSI r d Full ms2 1024.7673@cid30.00 [277.0000-2000.0000]

MS<sup>2</sup>

CID

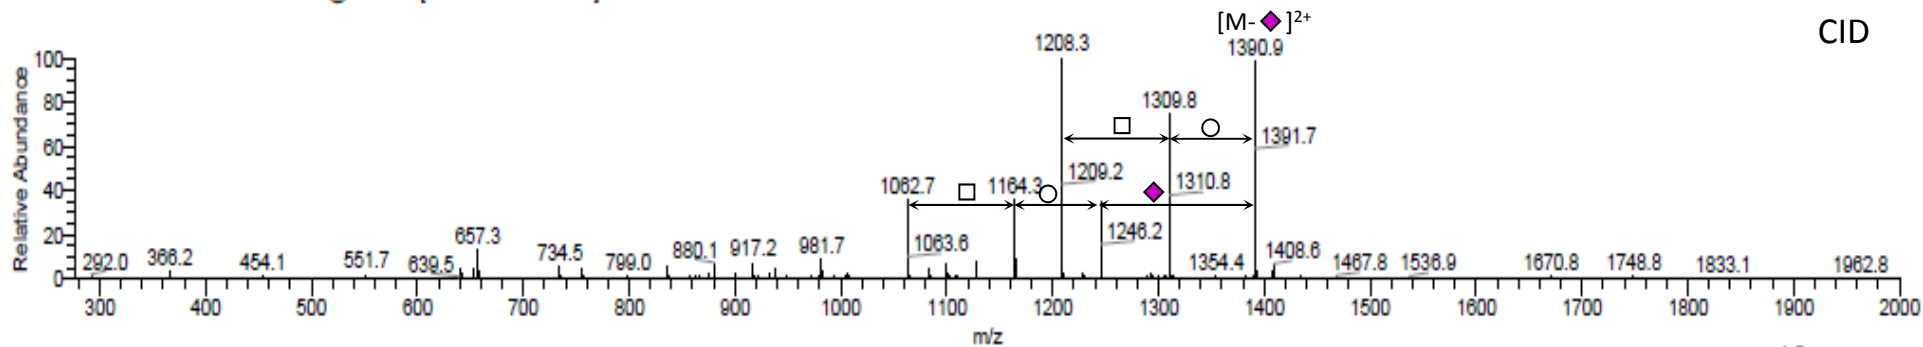

# HCT116-WT<sub>pyr</sub>QIHA**T**TPVR + Hex<sub>4</sub>HexNAC<sub>4</sub>NeuAc<sub>2</sub>

MS

HCT116\_aDG\_Fc\_WT#8116-9499 RT: 26.31-28.62 AV: 49 NL: 1.60E6  
F: FTMS + p NSI Full ms

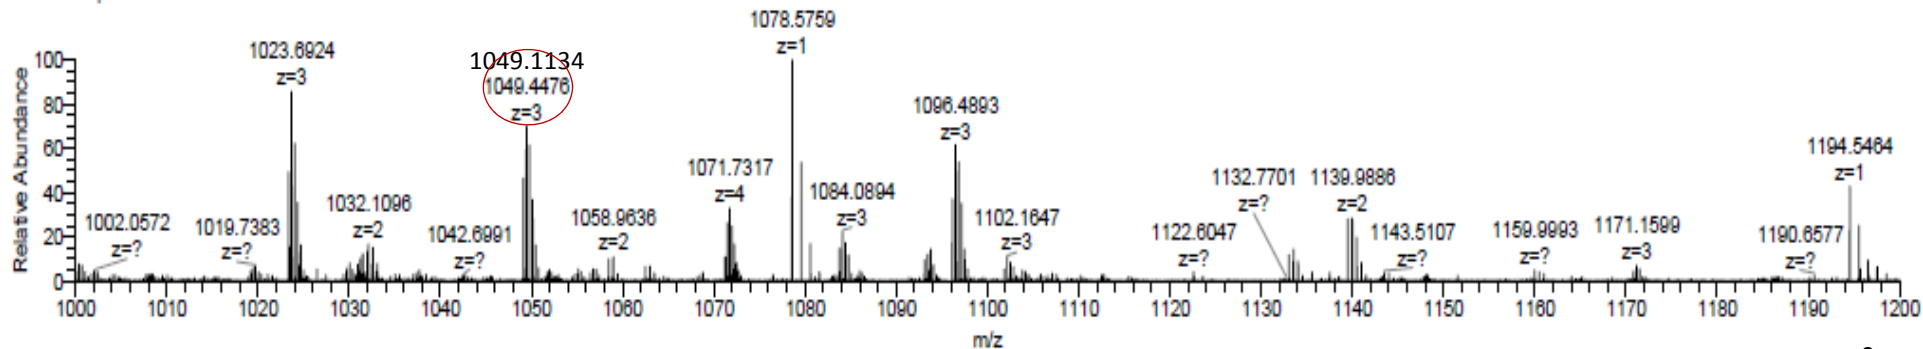

HCT116\_aDG\_Fc\_WT#8375 RT: 26.76 AV: 1 NL: 2.69E5  
T: FTMS + p NSI d Full ms2 1049.4485@hcd28.00 [120.0000-2000.0000]

MS<sup>2</sup>

HCD

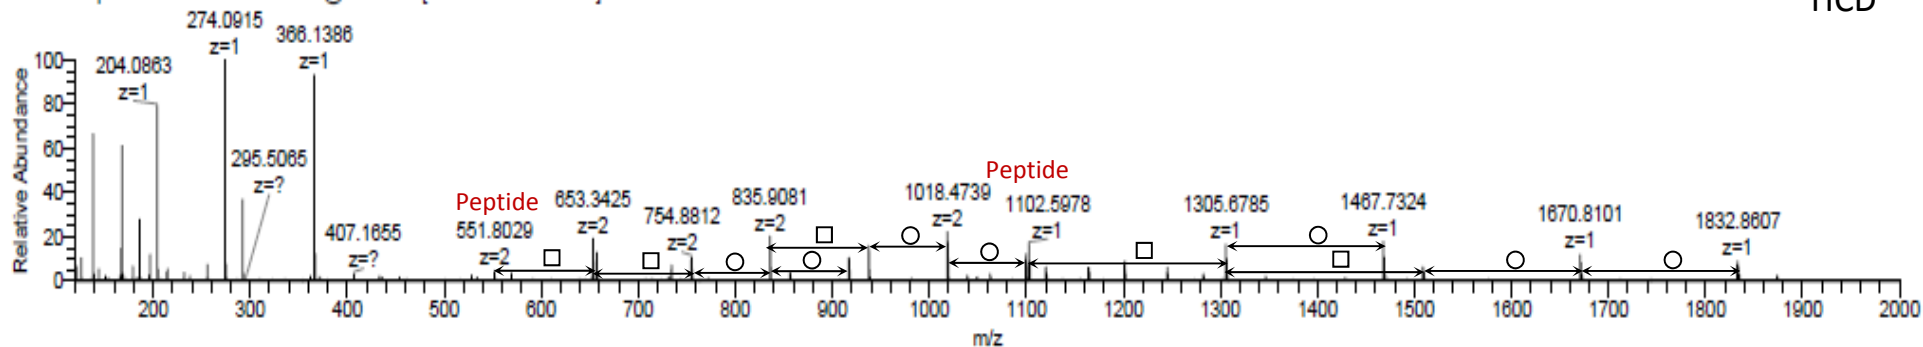

HCT116\_aDG\_Fc\_WT#8378 RT: 26.77 AV: 1 NL: 3.04E4  
T: ITMS + c NSI r d Full ms2 1049.4485@cid30.00 [283.0000-2000.0000]

MS<sup>2</sup>

CID

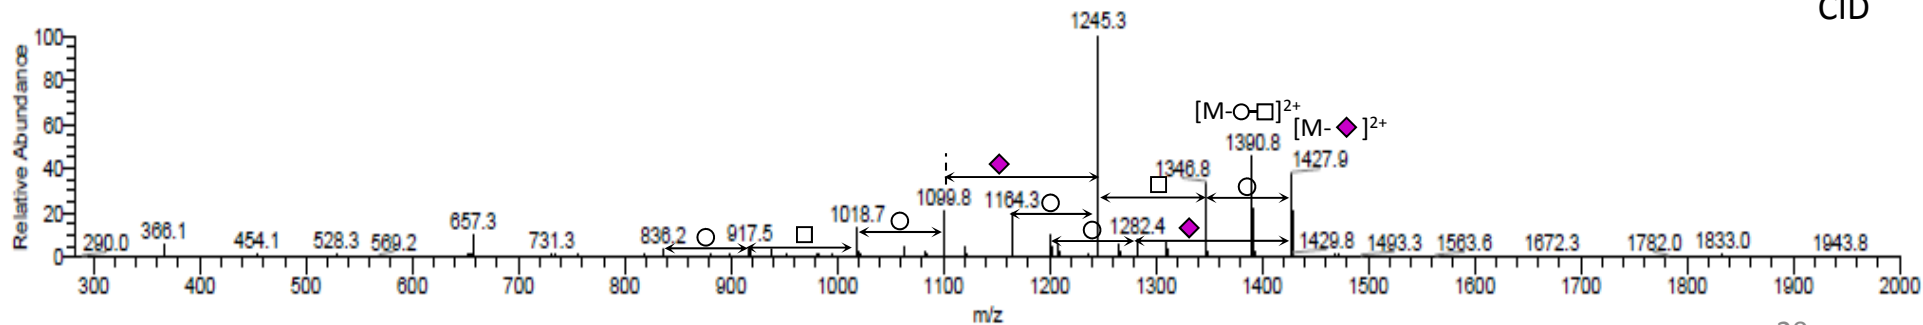

# HCT116-WT<sub>pyr</sub>QIHA**T**TPVR + Hex<sub>4</sub>HexNAC<sub>4</sub>NeuAc<sub>3</sub>

MS

HCT116\_aDG\_Fc\_WT #11406-11936 RT: 31.96-32.83 AV: 18 NL: 1.72E6  
F: FTMS + p NSI Full ms

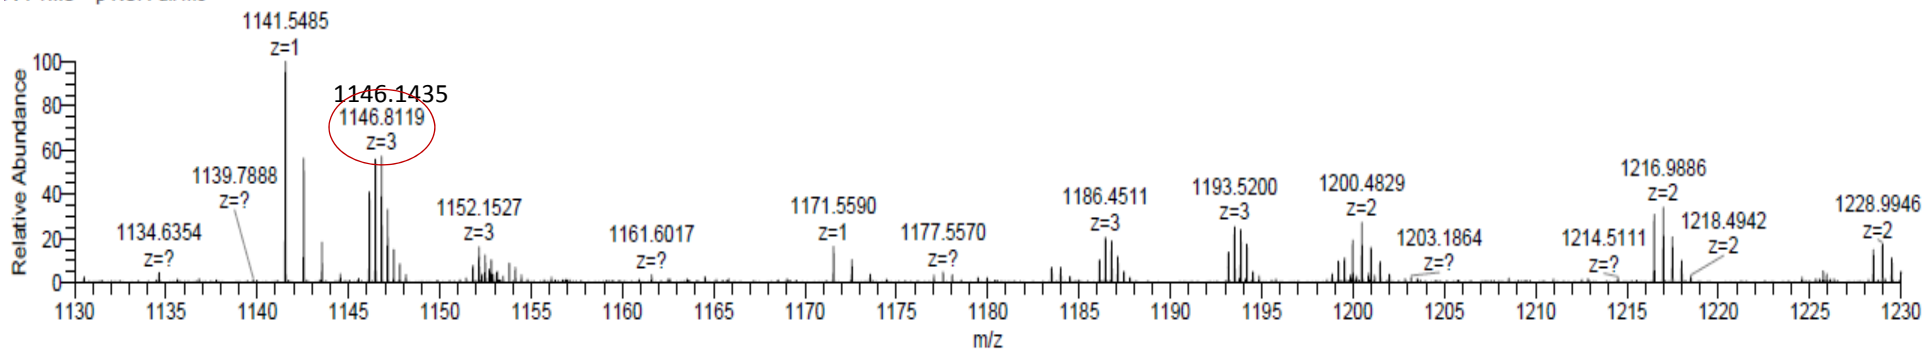

HCT116\_aDG\_Fc\_WT #11624 RT: 32.30 AV: 1 NL: 2.29E5  
T: FTMS + p NSI d Full ms2 1146.4786@hcd28.00 [120.0000-2000.0000]

MS<sup>2</sup>

HCD

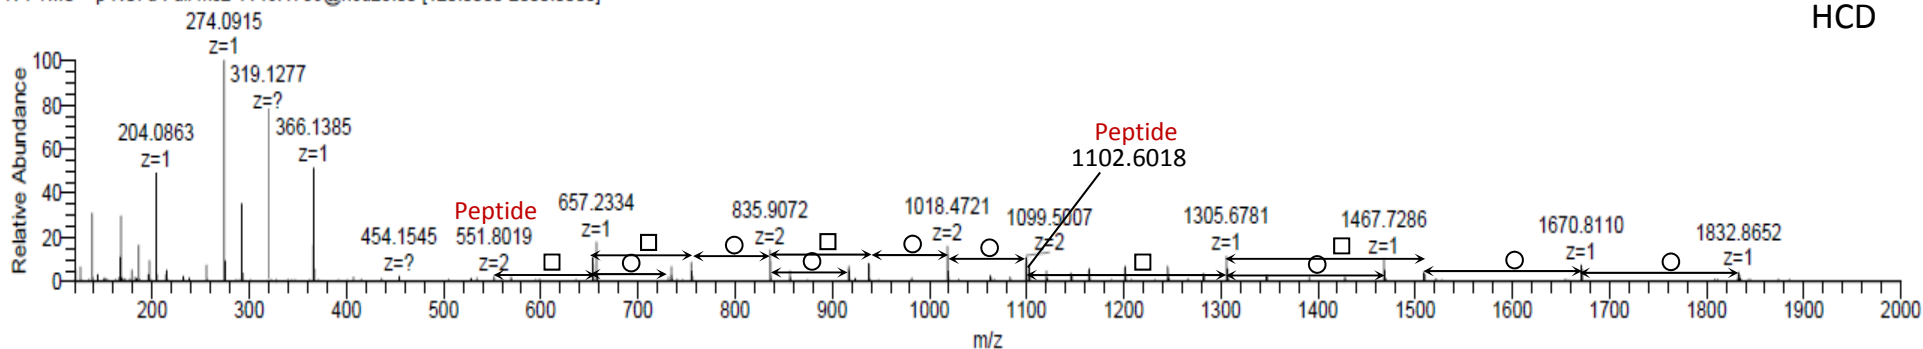

HCT116\_aDG\_Fc\_WT #11627 RT: 32.30 AV: 1 NL: 1.95E4  
T: ITMS + c NSI r d Full ms2 1146.4786@cid30.00 [310.0000-2000.0000]

MS<sup>2</sup>

CID

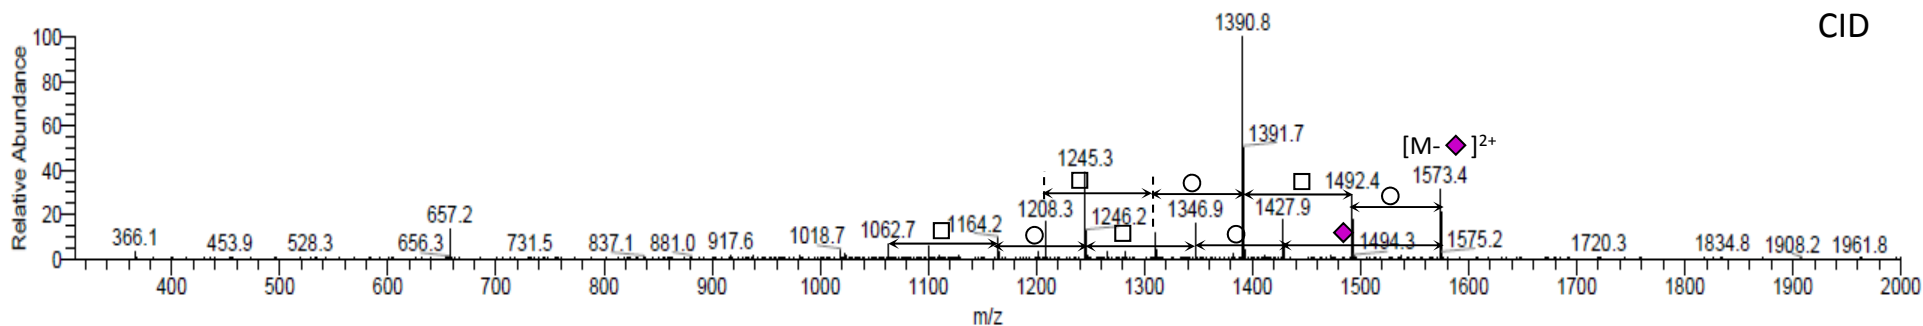

# HEK293-WT<sub>pyr</sub>QIHA<sup>T</sup>TPVR + Hex<sub>2</sub>HexNAC<sub>1</sub>P<sub>2</sub>

MS

HEK293\_DG373Fc\_3 #7548-7660 RT: 34.15-34.37 AV: 10 NL: 1.70E8  
F: FTMS + p NSI Full ms

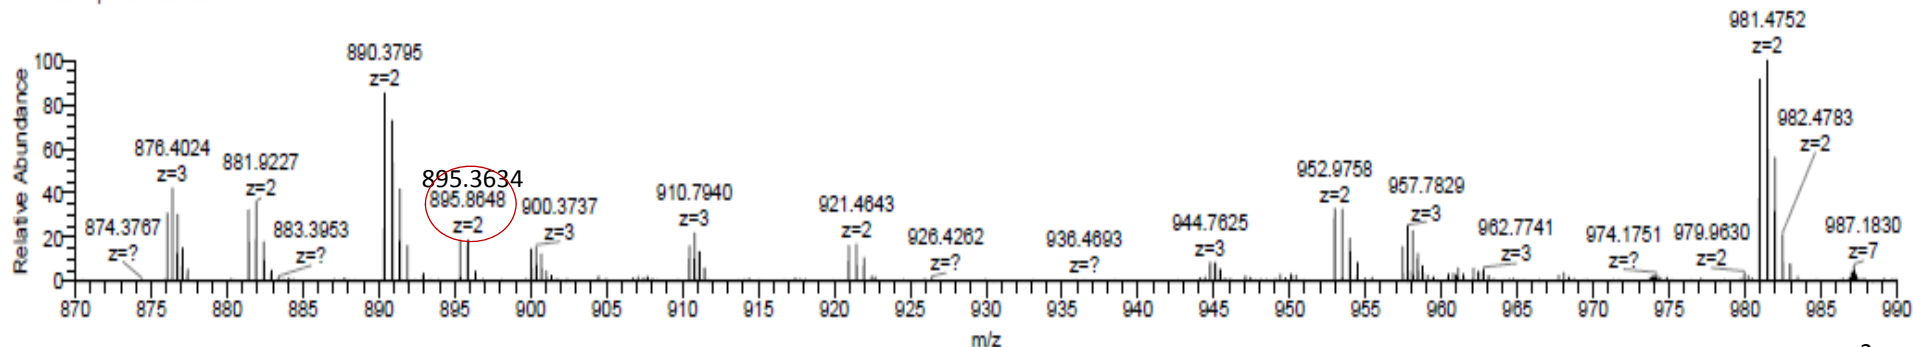

HEK293\_DG373Fc\_3 #7597 RT: 34.23 AV: 1 NL: 6.19E4  
T: FTMS + p NSI d Full ms2 895.3643@hod28.00 [120.0000-1801.0000]

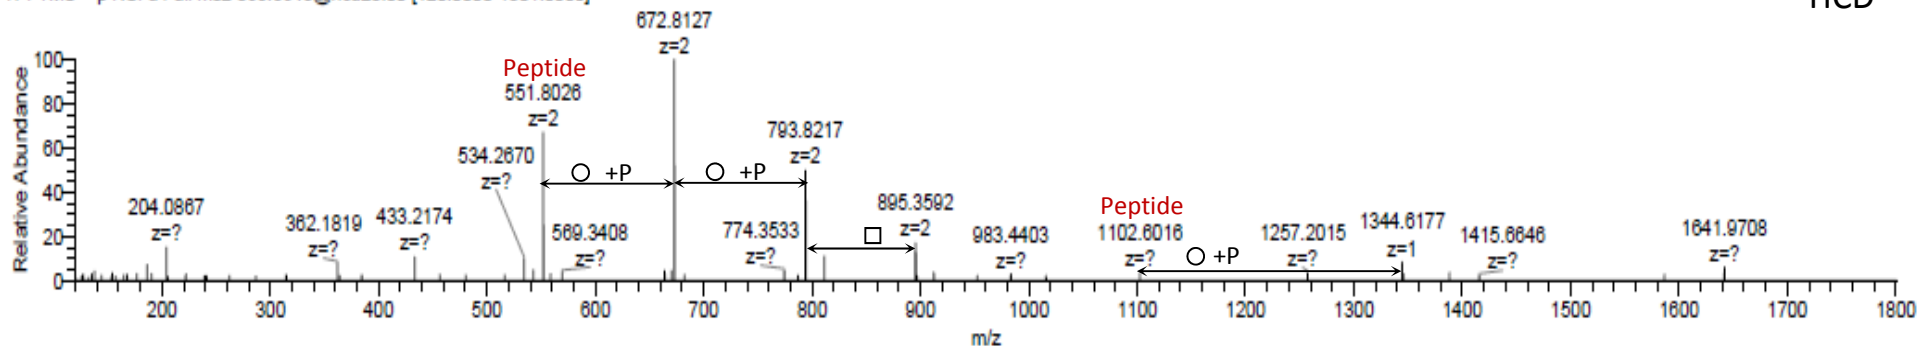

MS<sup>2</sup>

HCD

HEK293\_DG373Fc\_3 #7599 RT: 34.24 AV: 1 NL: 4.78E3  
T: ITMS + c NSI r d Full ms2 895.3643@cid30.00 [241.0000-1801.0000]

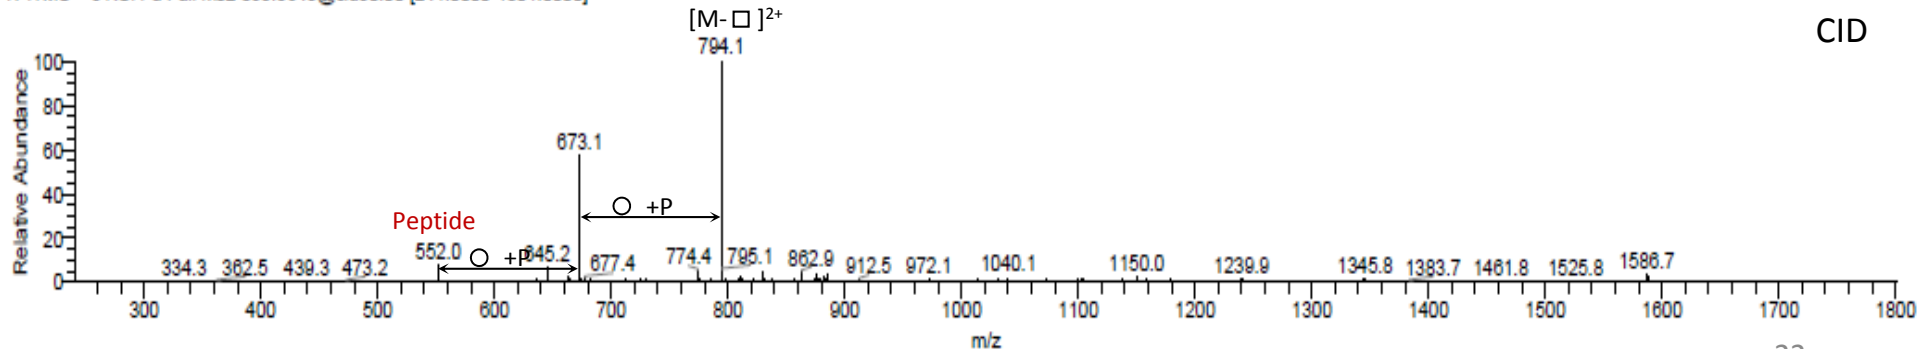

MS<sup>2</sup>

CID

# HEK293-WT<sub>pyr</sub>QIHA<sup>T</sup>TPVR + Hex<sub>3</sub>HexNAC<sub>1</sub>P<sub>1</sub>

MS

HEK293\_DG373Fc\_3 #4548-4629 RT: 27.24-27.39 AV: 9 NL: 8.65E5  
F: FTMS + p NSI Full ms

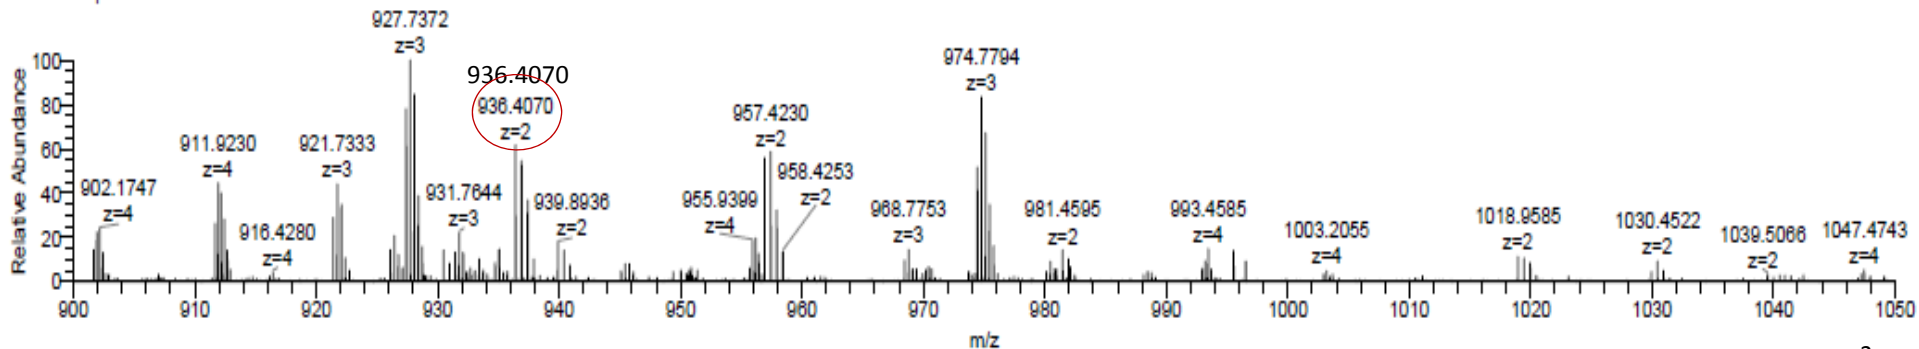

MS<sup>2</sup>

HCD

HEK293\_DG373Fc\_3 #4588 RT: 27.32 AV: 1 NL: 6.15E4  
T: FTMS + p NSI d Full ms2 936.4084@hcd28.00 [120.0000-1883.0000]

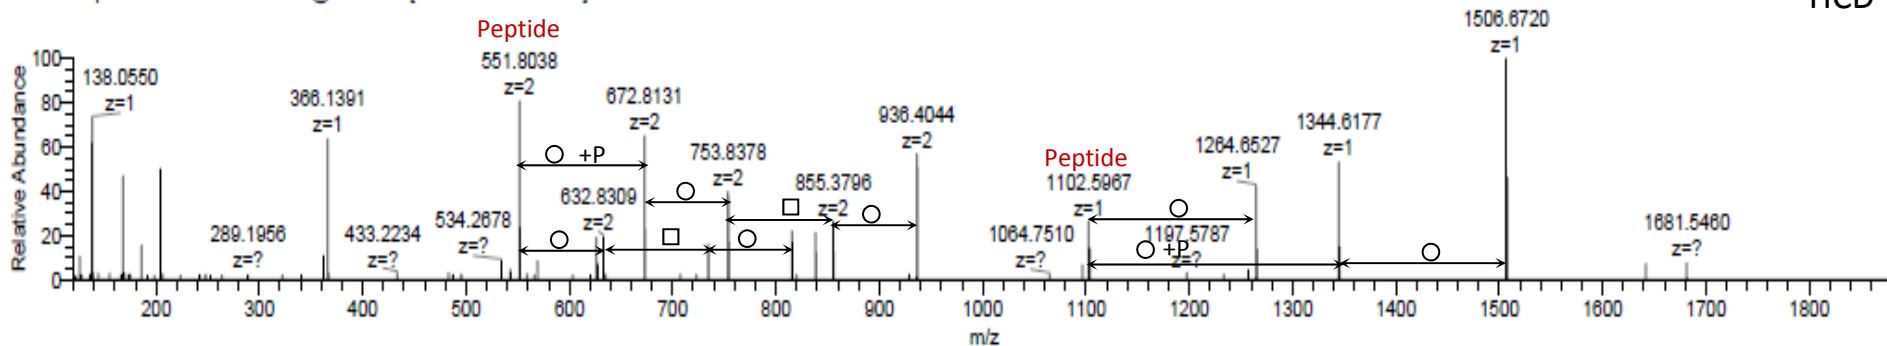

HEK293\_DG373Fc\_3 #4591 RT: 27.32 AV: 1 NL: 3.55E3  
T: ITMS + c NSI r d Full ms2 936.4084@cid30.00 [252.0000-1883.0000]

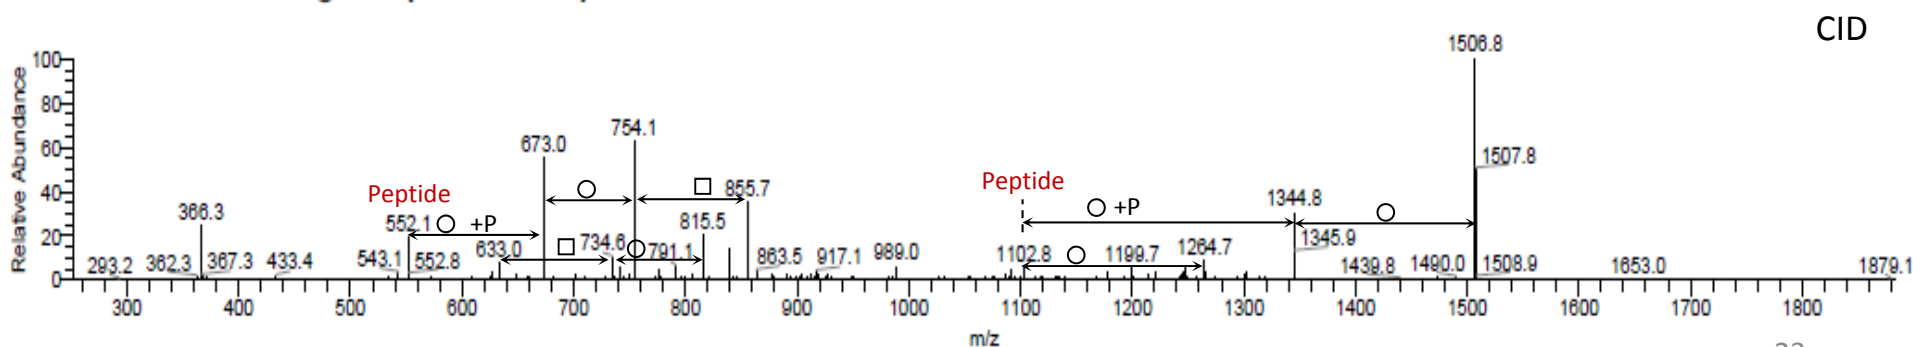

MS<sup>2</sup>

CID

# HEK293-WT<sub>pyr</sub>QIHA**T**TPVR + Hex<sub>2</sub>HexNAC<sub>2</sub>P<sub>1</sub>

HEK293\_DG373Fc\_3 #4985-5239 RT: 28.37-29.03 AV: 41 NL: 5.62E8  
F: FTMS + p NSI Full ms

MS

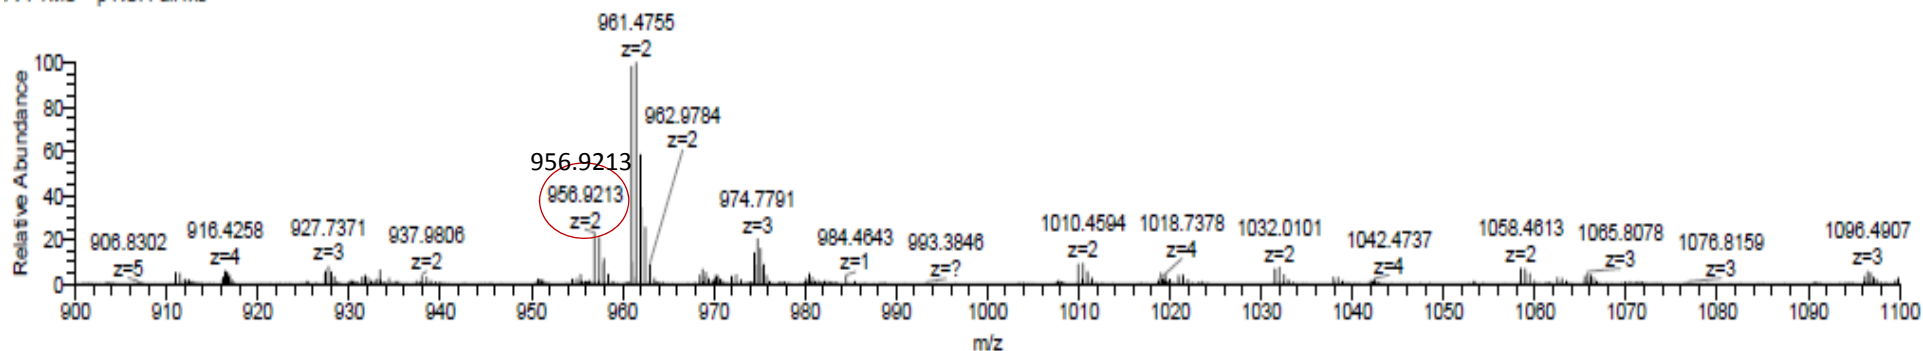

HEK293\_DG373Fc\_3 #5025 RT: 28.50 AV: 1 NL: 7.52E4

T: FTMS + p NSI d Full ms2 956.9217@hd28.00 [120.0000-1924.0000]

MS<sup>2</sup>

HCD

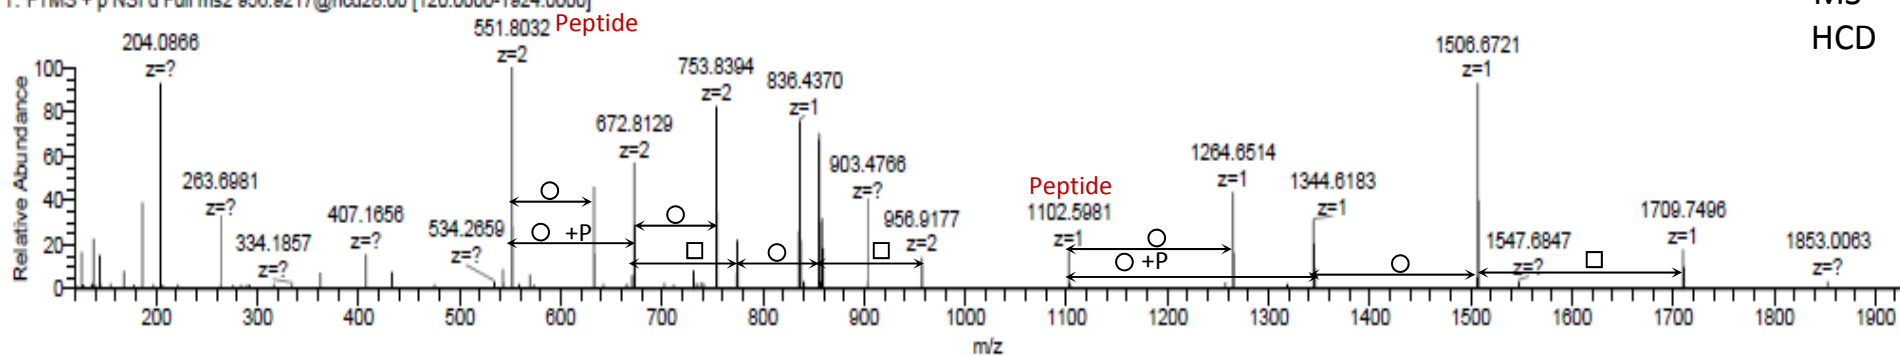

HEK293\_DG373Fc\_3 #5027 RT: 28.50 AV: 1 NL: 1.08E4

T: ITMS + c NSI r d Full ms2 956.9217@cid30.00 [258.0000-1924.0000]

MS<sup>2</sup>

CID

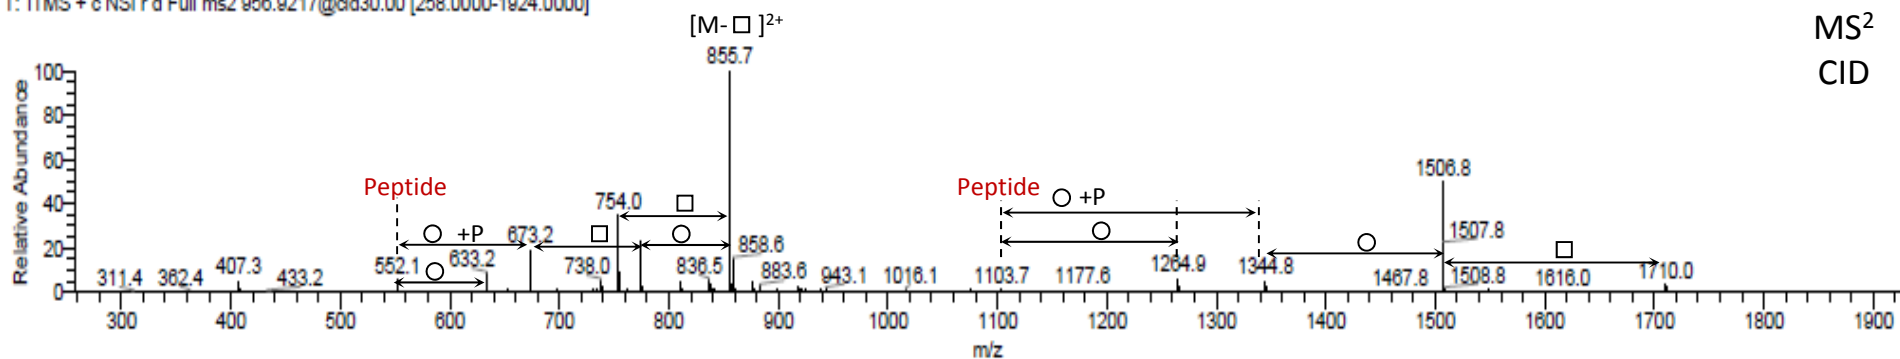



# HEK293-WT<sub>pyr</sub>QIHA<sup>T</sup>PT<sup>T</sup>PVR + Hex<sub>2</sub>HexNAc<sub>2</sub>P<sub>2</sub>

MS

HEK293\_DG373Fc\_3 #8892-7108 RT: 32.86-33.28 AV: 18 NL: 1.28E7  
F: FTMS + p NSI Full ms

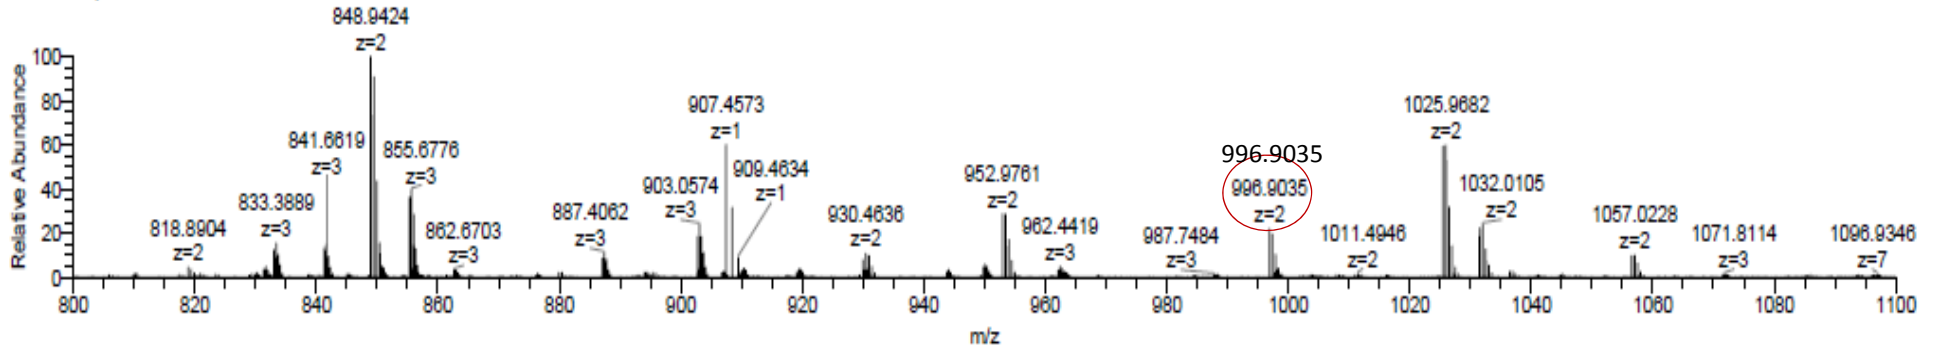

HEK293\_DG373Fc\_3 #8951 RT: 32.97 AV: 1 NL: 3.01E5  
T: FTMS + p NSI d Full ms2 996.9047@hod28.00 [120.0000-2000.0000]

MS<sup>2</sup>  
HCD

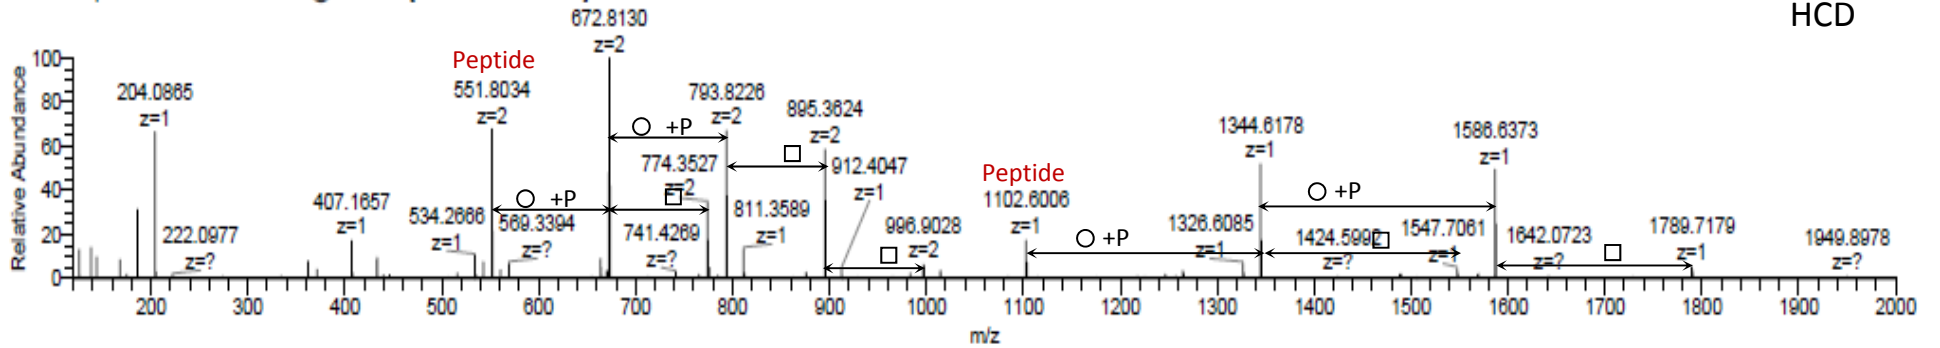

HEK293\_DG373Fc\_3 #8954 RT: 32.97 AV: 1 NL: 3.58E4  
T: ITMS + c NSI r d Full ms2 996.9047@cid30.00 [269.0000-2000.0000]

MS<sup>2</sup>  
CID

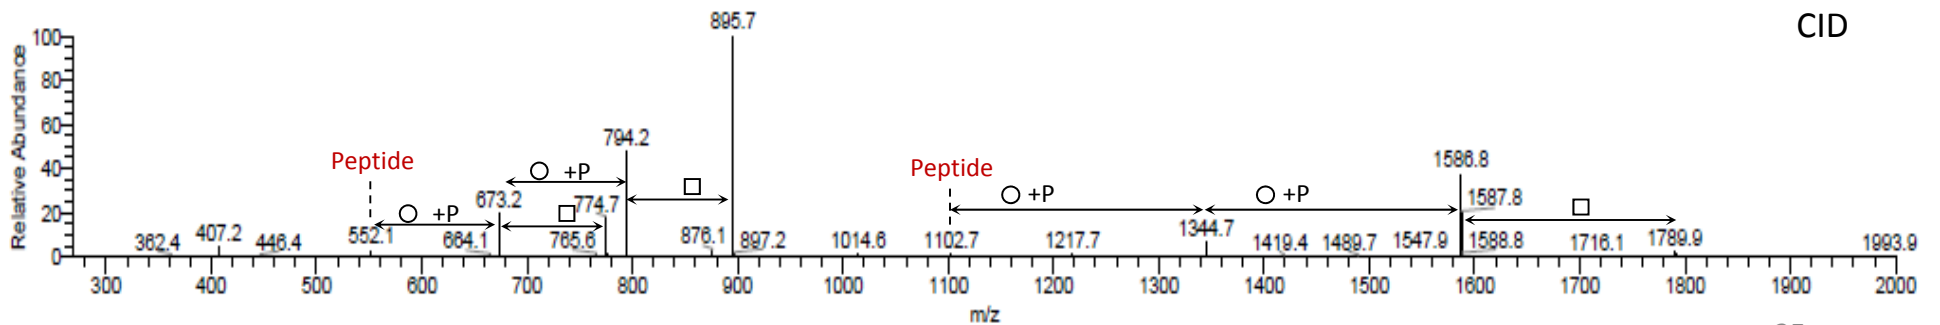

# HEK293-WT<sub>pyr</sub>QIHA<sup>T</sup>TPVR + Hex<sub>3</sub>HexNAC<sub>2</sub>P<sub>1</sub>

MS

HEK293\_DG373Fc\_3 #4837-5047 RT: 28.01-28.54 AV: 33 NL: 1.13E6  
F: FTMS + p NSI Full ms

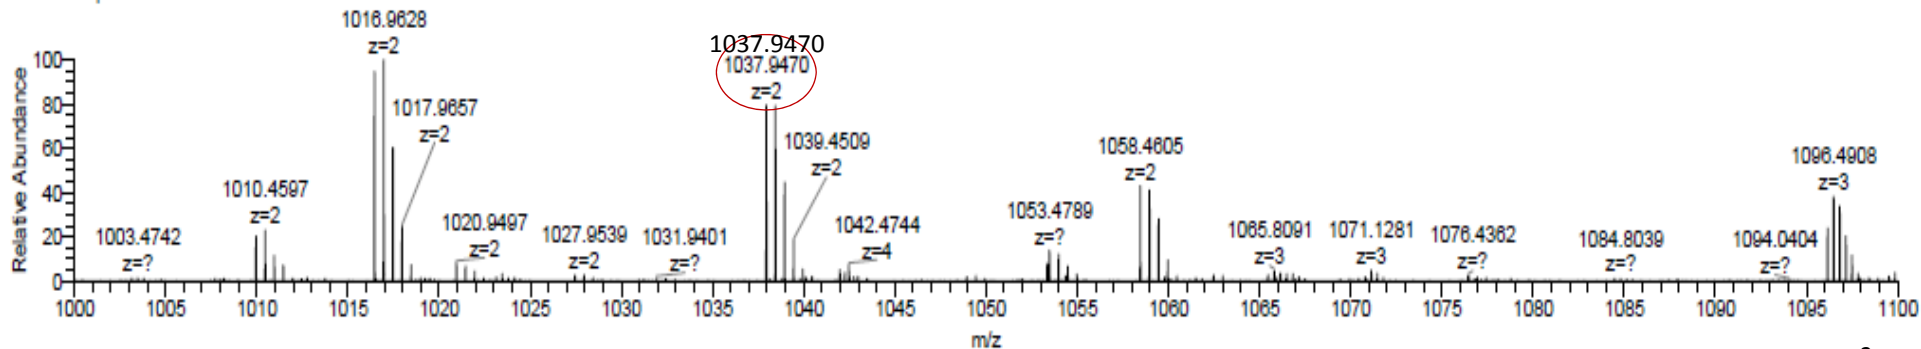

MS<sup>2</sup>

HCD

HEK293\_DG373Fc\_3 #4899 RT: 28.17 AV: 1 NL: 1.36E5  
T: FTMS + p NSI d Full ms2 1038.4491@hcd28.00 [120.0000-2000.0000]

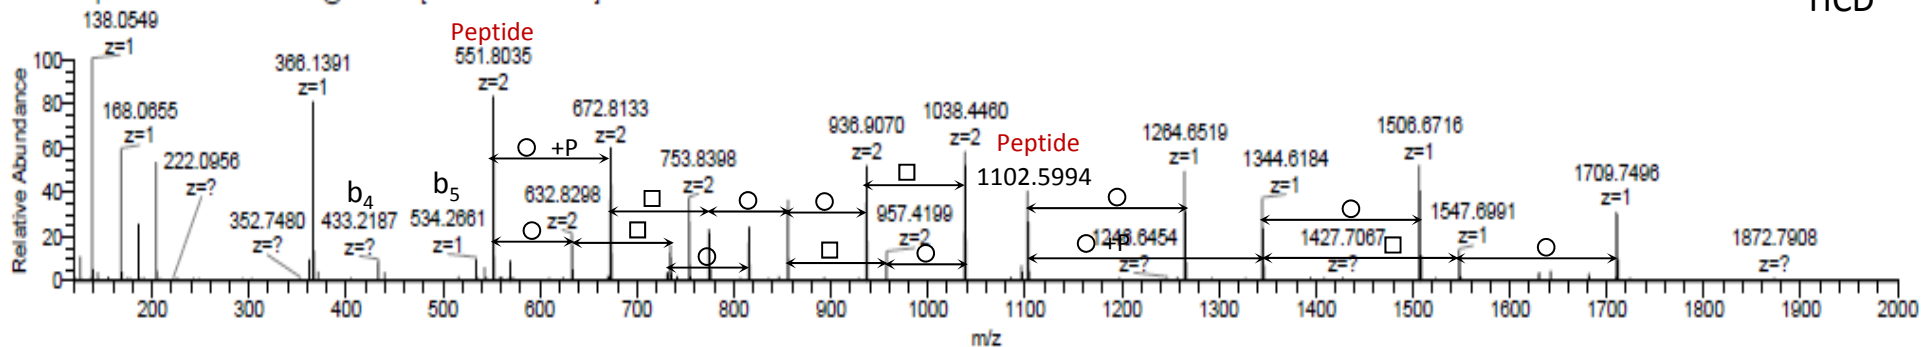

HEK293\_DG373Fc\_3 #4902 RT: 28.17 AV: 1 NL: 1.07E4  
T: ITMS + c NSI r d Full ms2 1038.4491@cid30.00 [280.0000-2000.0000]

MS<sup>2</sup>

CID

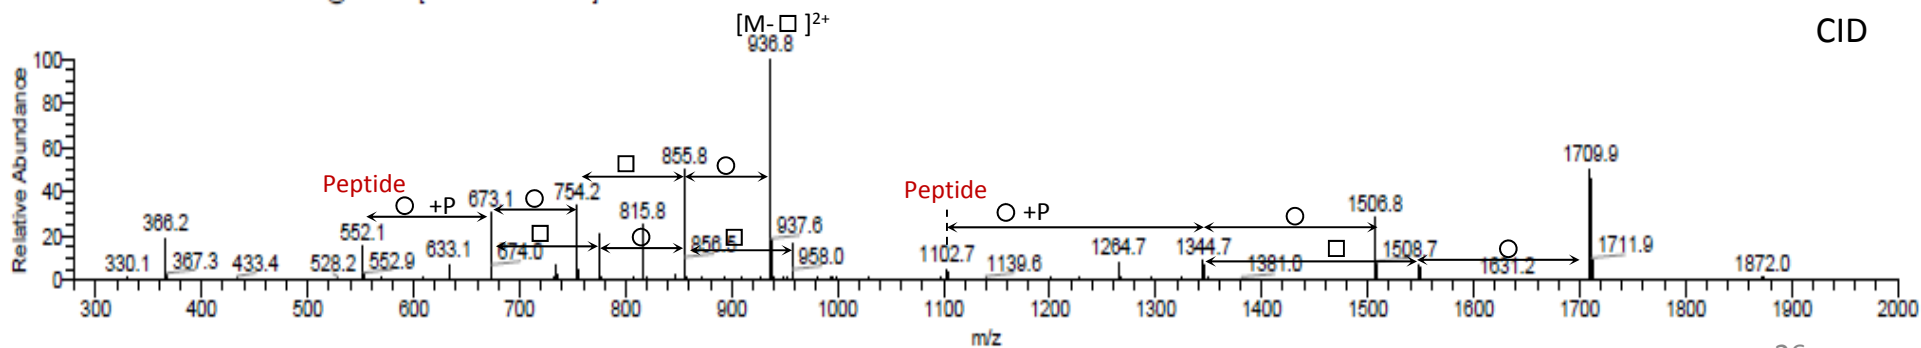

# HEK293-WT<sub>pyr</sub>QIHA<sup>T</sup>TPVR + Hex<sub>2</sub>HexNAC<sub>3</sub>P<sub>1</sub>

MS

HEK293\_DG373Fc\_3 #4521-4819 RT: 27.15-27.92 AV: 48 NL: 5.62E8  
F: FTMS + p NSI Full ms

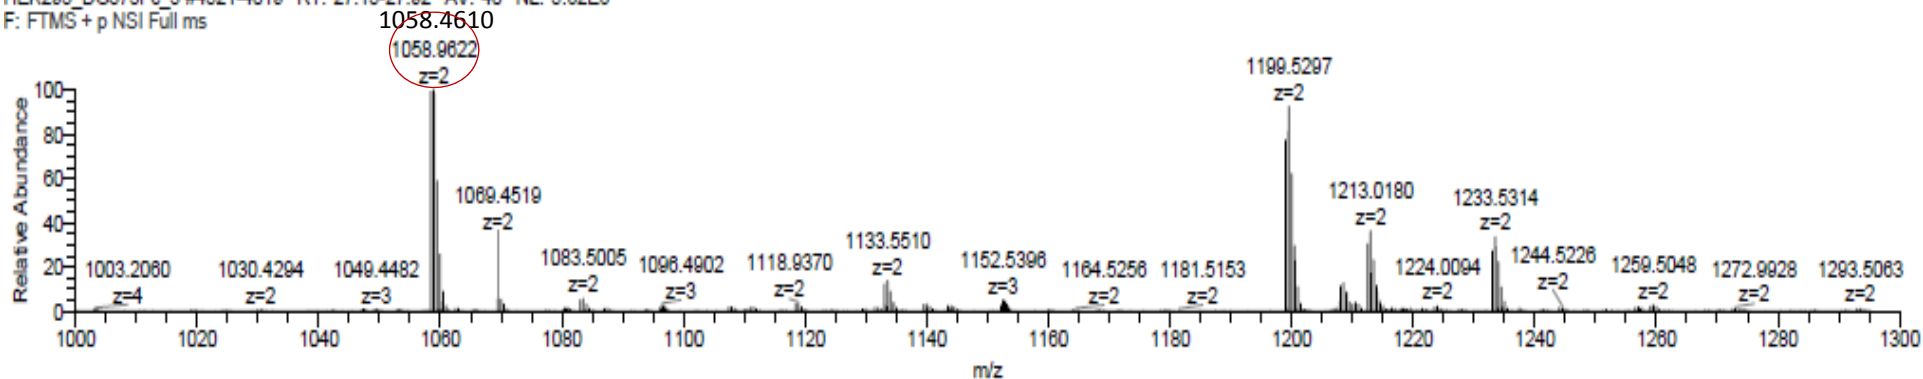

HEK293\_DG373Fc\_3 #4548 RT: 27.22 AV: 1 NL: 1.23E5  
T: FTMS + p NSI d Full ms2 1058.9622@hcd28.00 [120.0000-2000.0000]

MS<sup>2</sup>

HCD

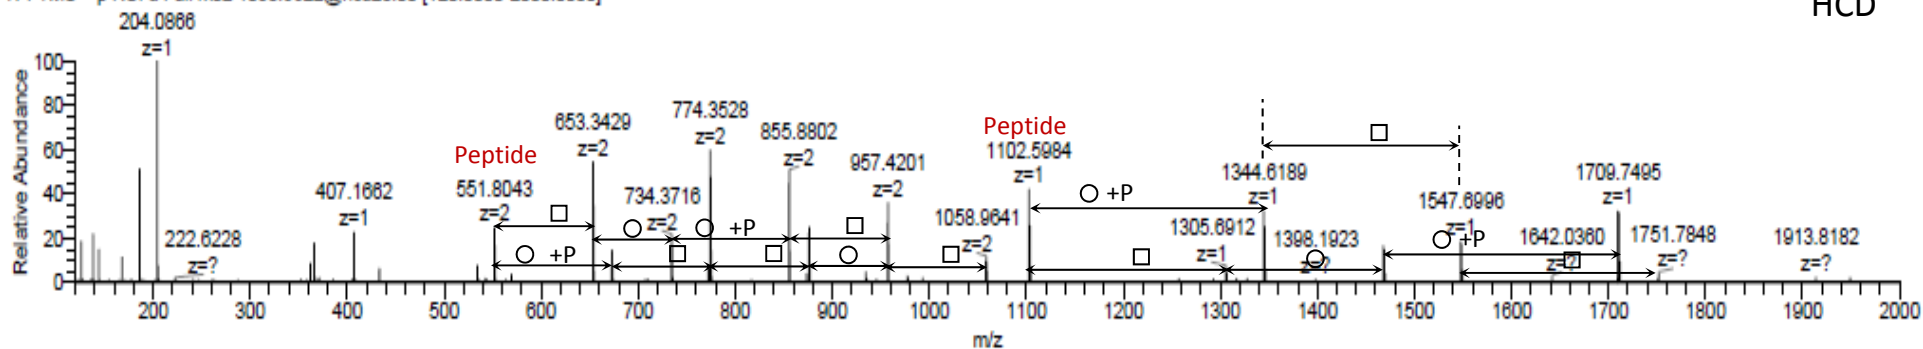

HEK293\_DG373Fc\_3 #4551 RT: 27.23 AV: 1 NL: 1.42E4  
T: ITMS + c NSI r d Full ms2 1058.9622@cid30.00 [286.0000-2000.0001]

MS<sup>2</sup>

CID

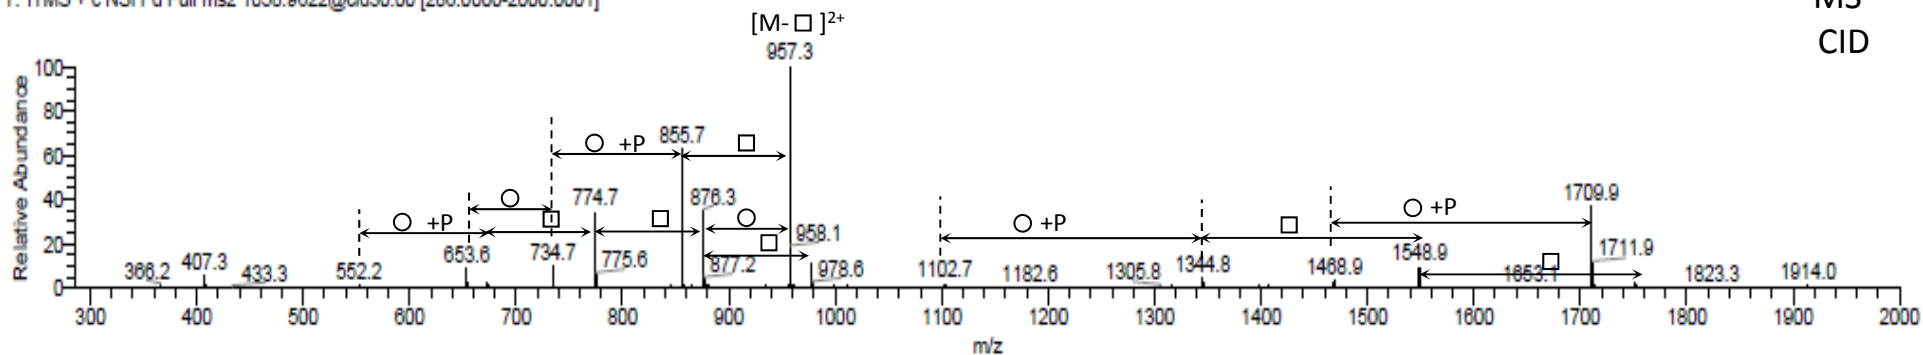

# HCT116-WT<sub>pyr</sub>QIHA<sup>T</sup>TPVR + Hex<sub>2</sub>HexNAC<sub>3</sub>P<sub>2</sub>

MS

HCT116\_aDG\_Fc\_WT #11914-12234 RT: 32.83-33.34 AV: 11 NL: 2.50E6  
F: FTMS + p NSI Full ms

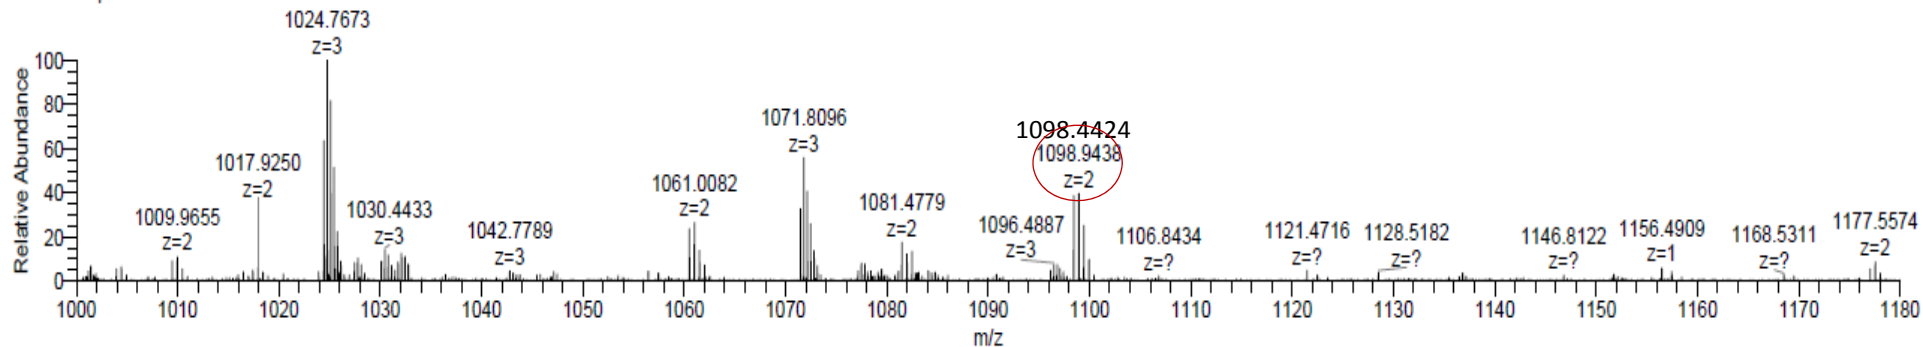

HCT116\_aDG\_Fc\_WT #12054 RT: 33.04 AV: 1 NL: 3.11E5  
T: FTMS + p NSI d Full ms2 1098.9440@hcd28.00 [120.0000-2000.0000]

MS<sup>2</sup>

HCD

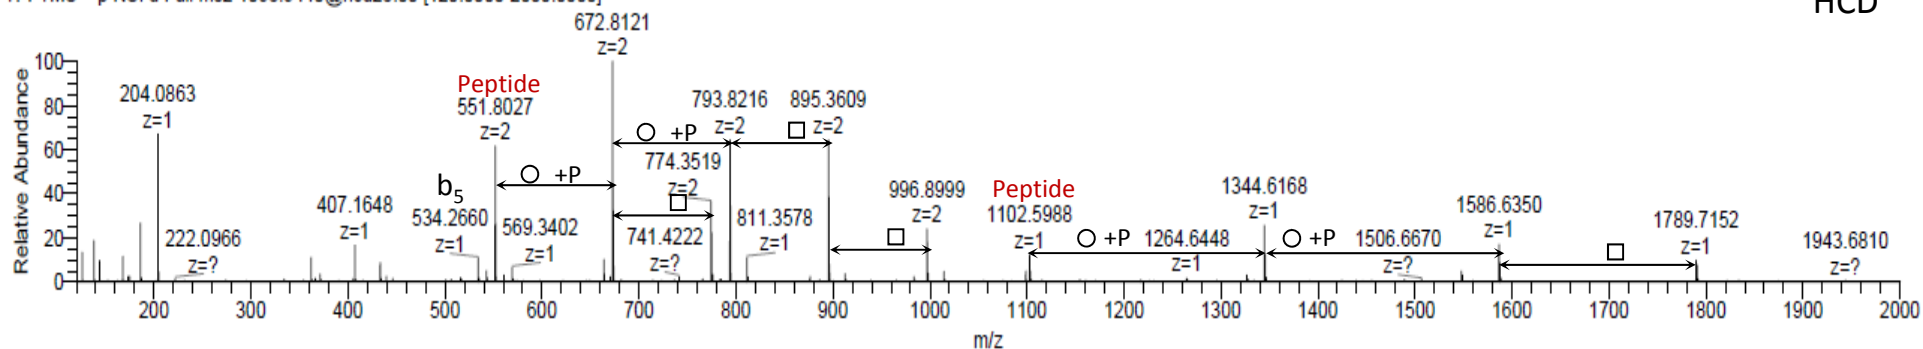

HCT116\_aDG\_Fc\_WT #12057 RT: 33.04 AV: 1 NL: 3.35E4  
T: ITMS + c NSI r d Full ms2 1098.9440@cid30.00 [297.0000-2000.0000]

MS<sup>2</sup>

CID

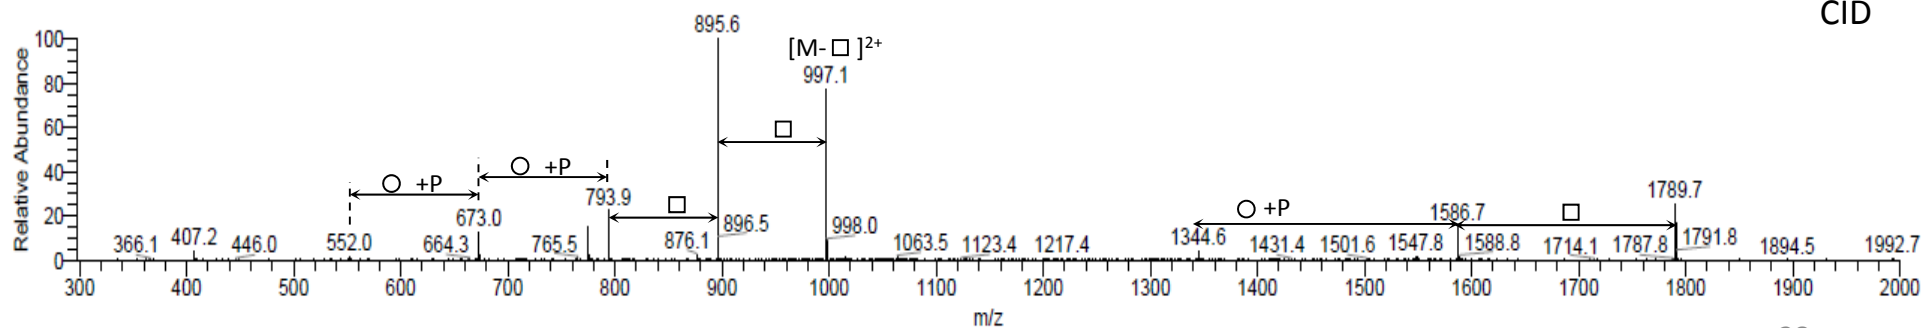

# HEK293-WT<sub>pyr</sub>QIHA<sup>T</sup>TPVR + Hex<sub>2</sub>HexNAC<sub>2</sub>NeuAc<sub>1</sub>P<sub>1</sub>

MS

HEK293\_DG373Fc\_3 #8529-8820 RT: 32.16-32.69 AV: 15 NL: 4.08E5  
F: FTMS + p NSI Full ms

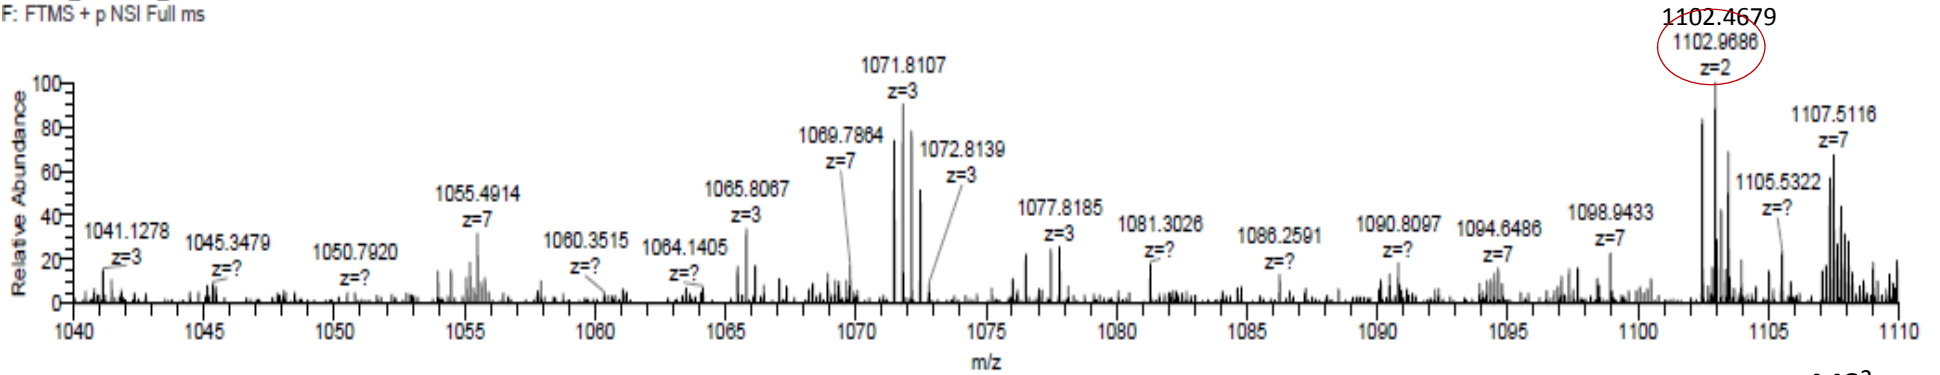

HEK293\_DG373Fc\_3 #8641 RT: 32.36 AV: 1 NL: 2.40E4

T: FTMS + p NSI d Full ms2 1102.4678@hcd28.00 [120.0000-2000.0000]

MS<sup>2</sup>  
HCD

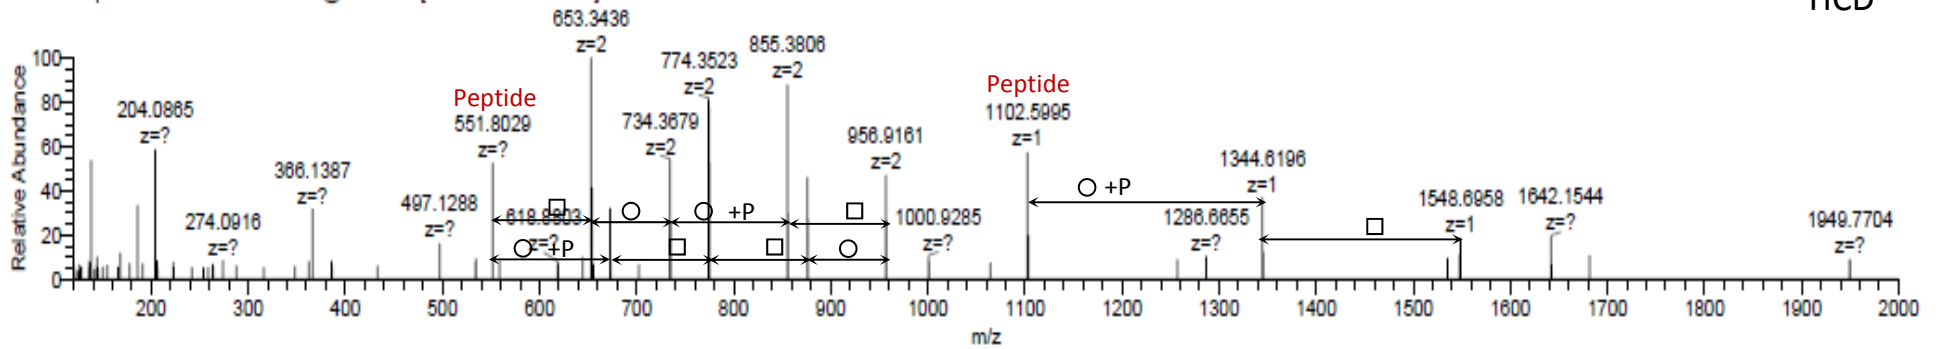

HEK293\_DG373Fc\_3 #8644 RT: 32.36 AV: 1 NL: 2.52E3

T: ITMS + c NSI r d Full ms2 1102.4678@cid30.00 [298.0000-1999.9999]

MS<sup>2</sup>  
CID

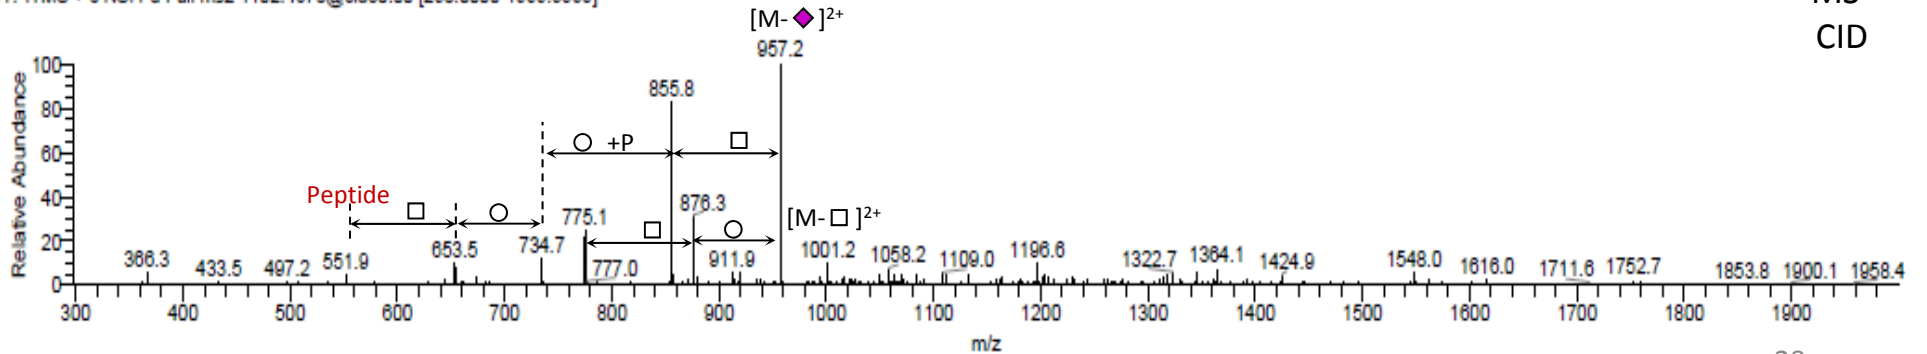

# HEK293-WT<sub>pyr</sub>QIHA<sup>T</sup>TPVR + Hex<sub>3</sub>HexNAC<sub>3</sub>P<sub>1</sub>

MS

HEK293\_DG373Fc\_3 #4848-5058 RT: 28.05-28.58 AV: 32 NL: 2.04E7  
F: FTMS + p NSI Full ms

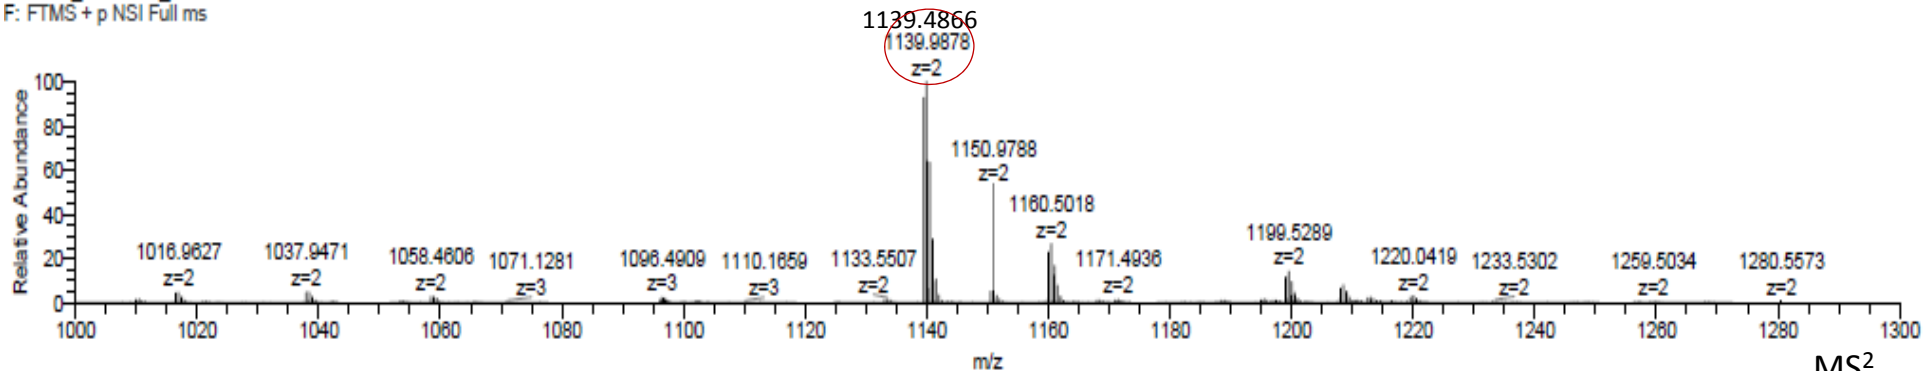

MS<sup>2</sup>  
HCD

HEK293\_DG373Fc\_3 #5044 RT: 28.55 AV: 1 NL: 1.05E5  
T: FTMS + p NSI d Full ms2 1139.4860@hcd28.00 [120.0000-2000.0000]

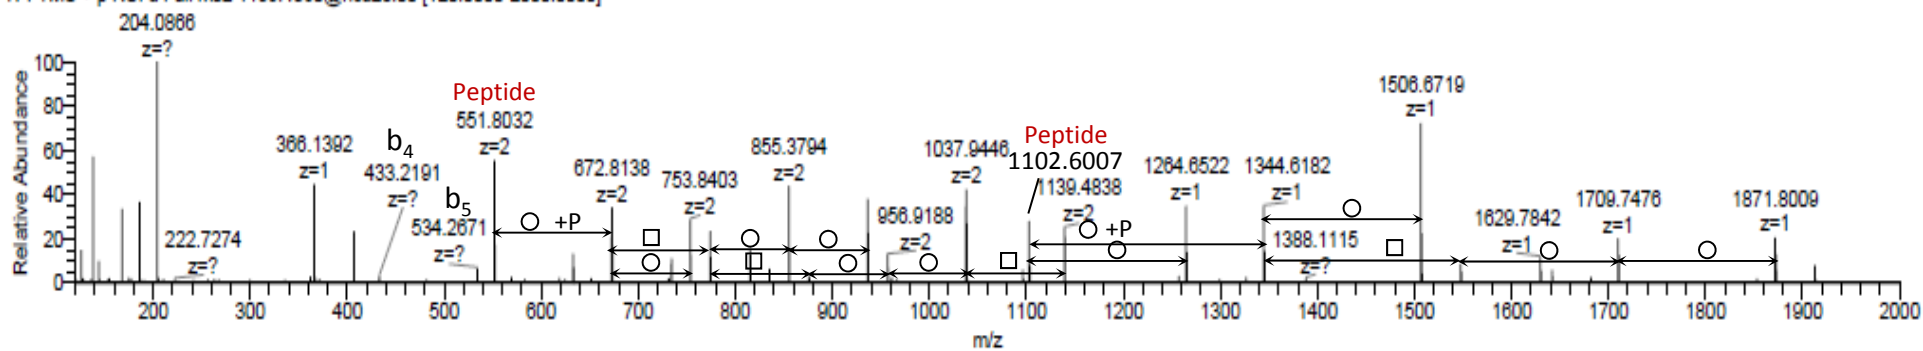

HEK293\_DG373Fc\_3 #5047 RT: 28.55 AV: 1 NL: 4.55E3  
T: ITMS + c NSI r d Full ms2 1139.4860@cid30.00 [308.0000-2000.0001]

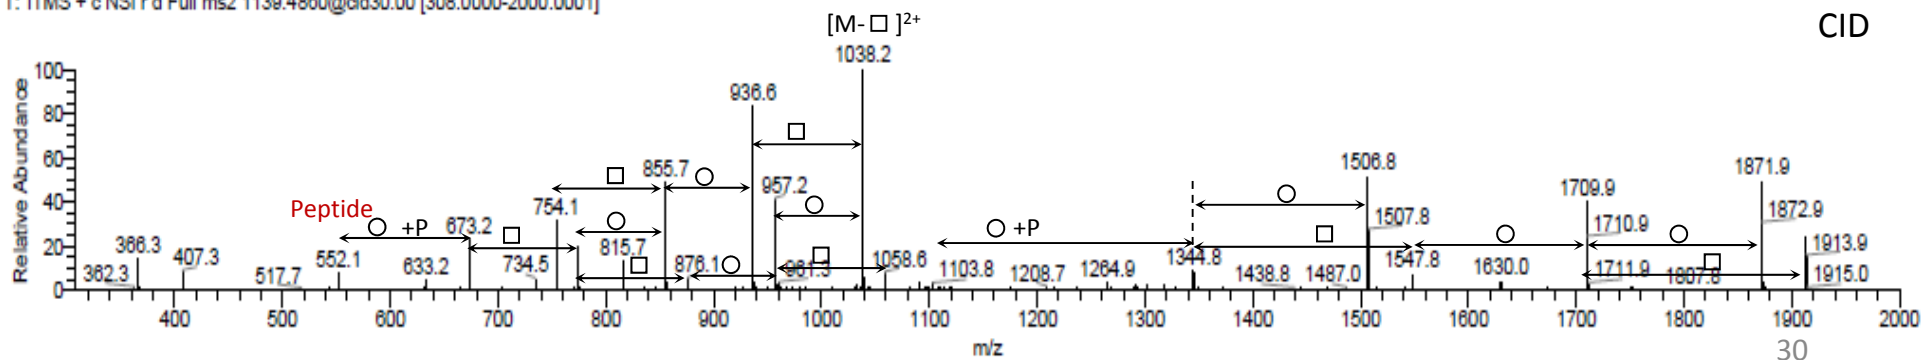

MS<sup>2</sup>  
CID

# HEK293-WT<sub>pyr</sub>QIHA<sup>T</sup>TPVR + Hex<sub>2</sub>HexNAC<sub>4</sub>P<sub>1</sub>

MS

HEK293\_DG373Fc\_2 #4153 RT: 28.25 AV: 1 NL: 1.72E7  
F: FTMS + p NSI Full ms

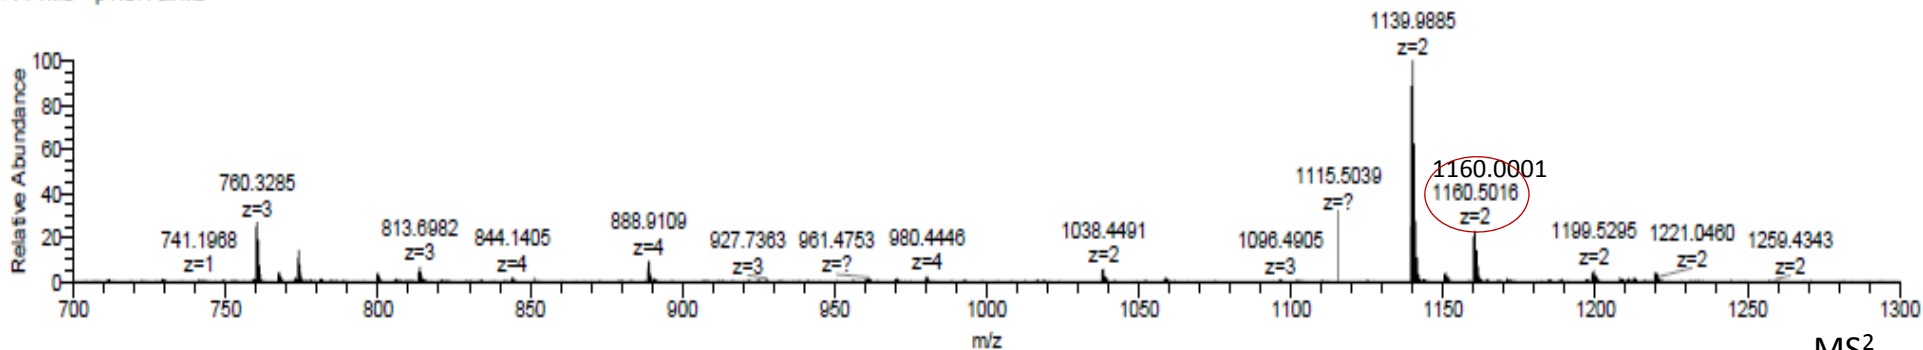

MS<sup>2</sup>  
HCD

HEK293\_DG373Fc\_2 #4123 RT: 28.16 AV: 1 NL: 1.15E5  
T: FTMS + p NSI d Full ms2 1160.5031@hcd28.00 [120.0000-2000.0000]

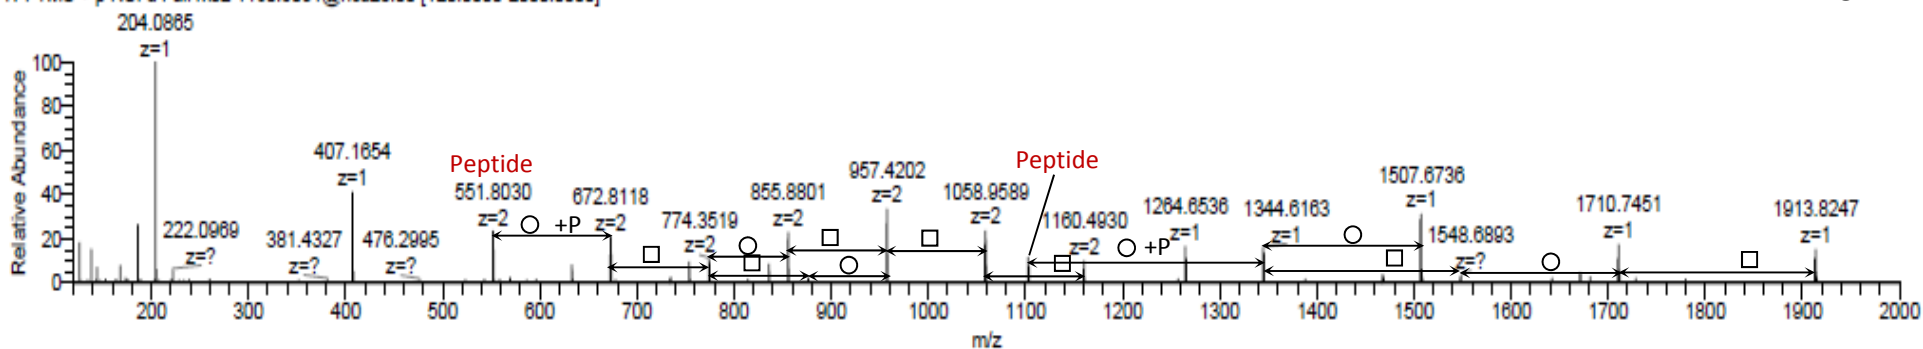

HEK293\_DG373Fc\_2 #4125 RT: 28.17 AV: 1 NL: 5.11E3  
T: ITMS + c NSI r d Full ms2 1160.5031@cid30.00 [314.0000-2000.0000]

MS<sup>2</sup>  
CID

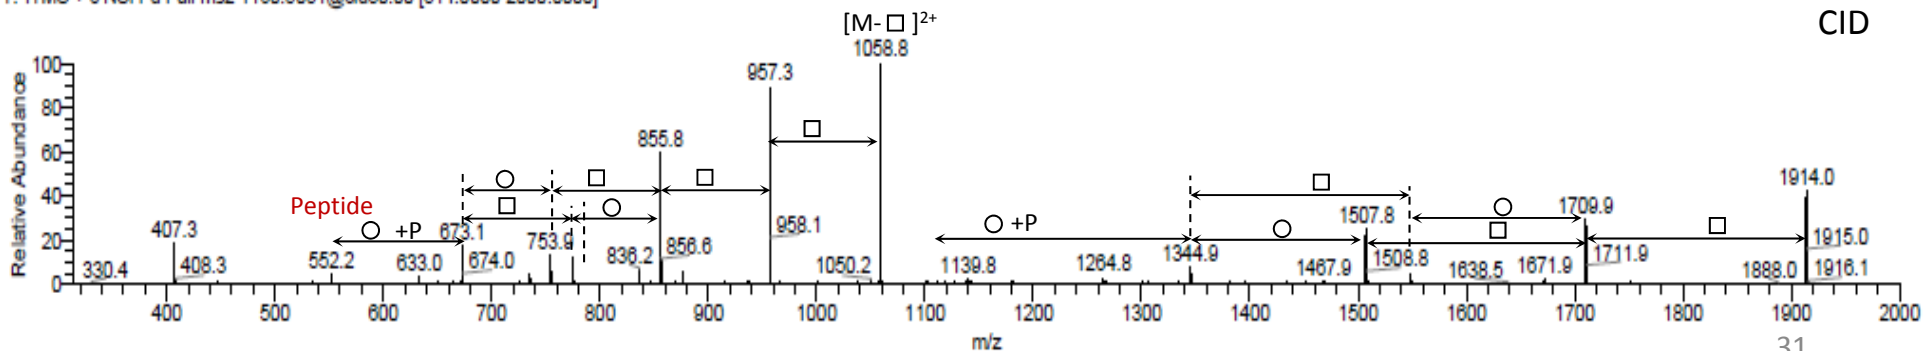

# HEK293-WT<sub>pyr</sub>QIHA<sup>T</sup>TPVR + Hex<sub>3</sub>HexNAC<sub>3</sub>P<sub>2</sub>

MS

HEK293\_DG373Fc\_3 #7067-7500 RT: 33.21-34.04 AV: 26 NL: 3.44E6  
F: FTMS + p NSI Full ms

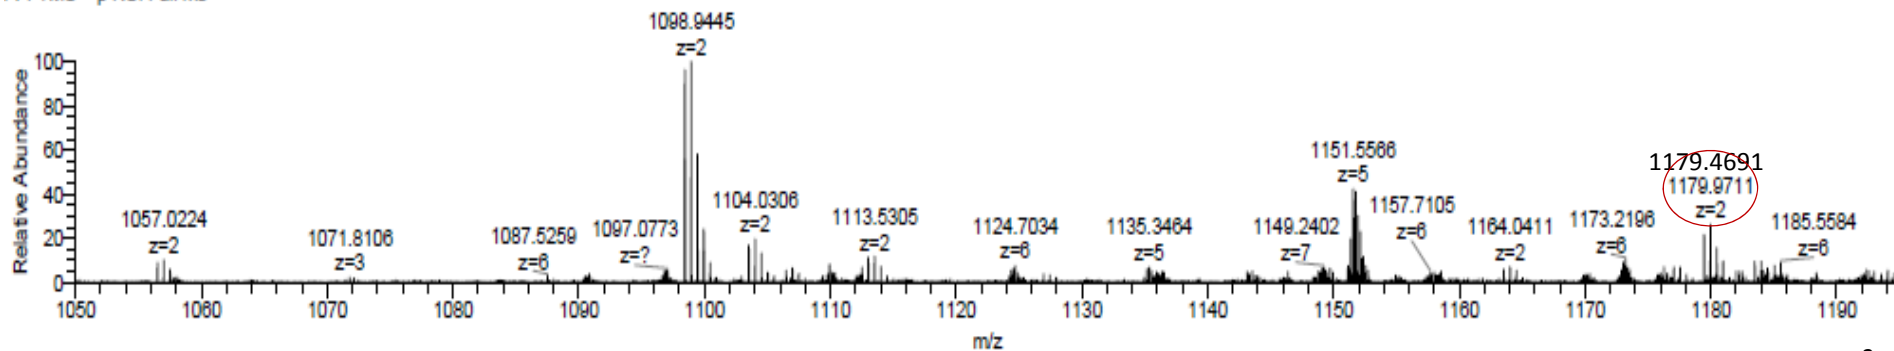

MS<sup>2</sup>

HCD

HEK293\_DG373Fc\_3 #7200 RT: 33.48 AV: 1 NL: 5.38E4  
T: FTMS + p NSI d Full ms2 1179.9714@hcd28.00 [120.0000-2000.0000]

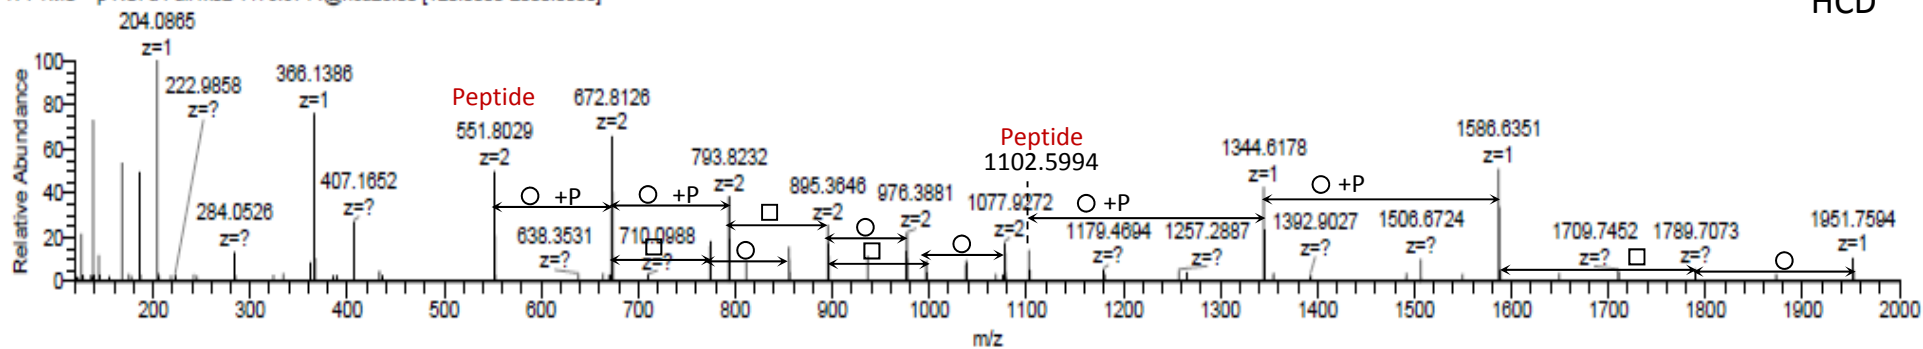

HEK293\_DG373Fc\_3 #7203 RT: 33.49 AV: 1 NL: 2.08E3  
T: ITMS + c NSI r d Full ms2 1179.9714@cid30.00 [319.0000-2000.0000]

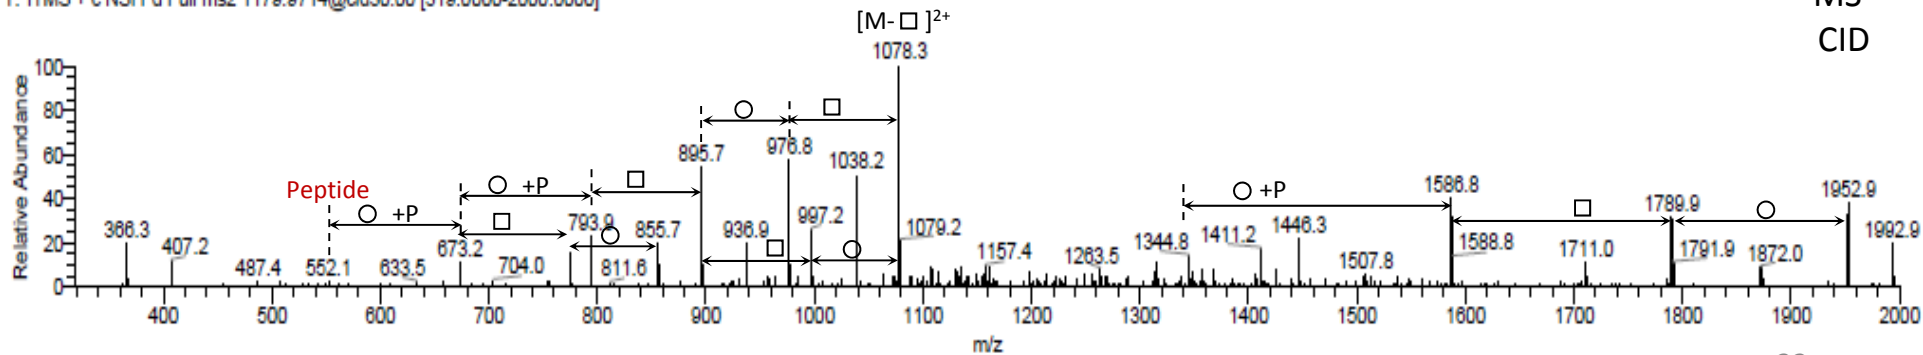

MS<sup>2</sup>

CID



# HEK293-WT<sub>pyr</sub>QIHA<sup>T</sup>TPVR + Hex<sub>3</sub>HexNAC<sub>2</sub>NeuAc<sub>1</sub>P<sub>1</sub>

HEK293\_DG373Fc\_3 #7215-7383 RT: 33.51-33.82 AV: 9 NL: 1.66E3  
F: FTMS + p NSI Full ms

MS

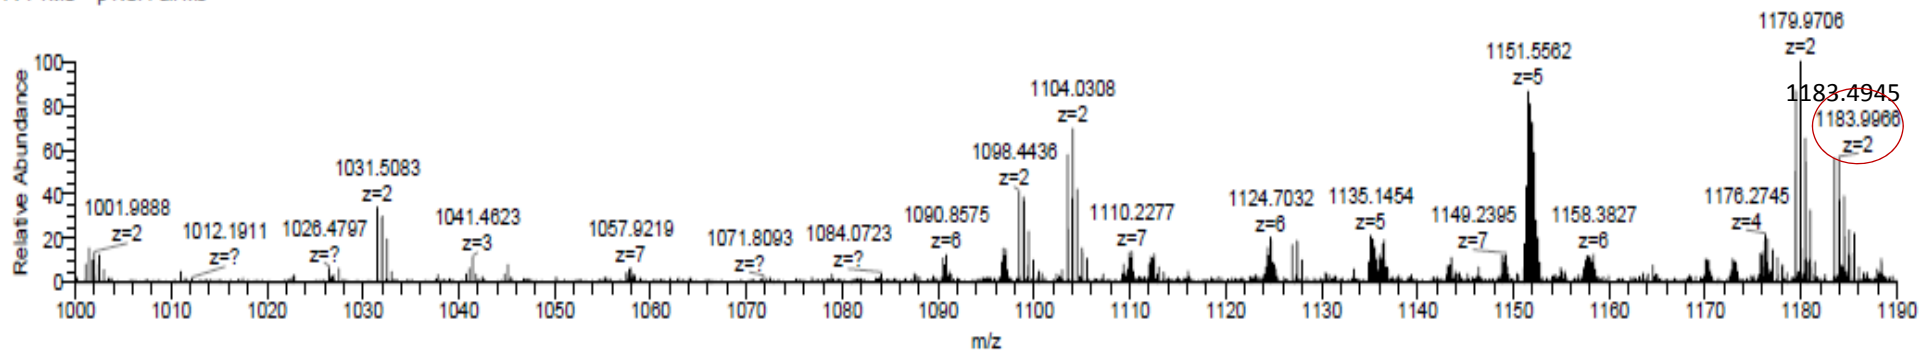

HEK293\_DG373Fc\_3 #7287 RT: 33.65 AV: 1 NL: 3.19E4  
T: FTMS + p NSI d Full ms2 1183.4946@hcd28.00 [120.0000-2000.0000]

MS<sup>2</sup>

HCD

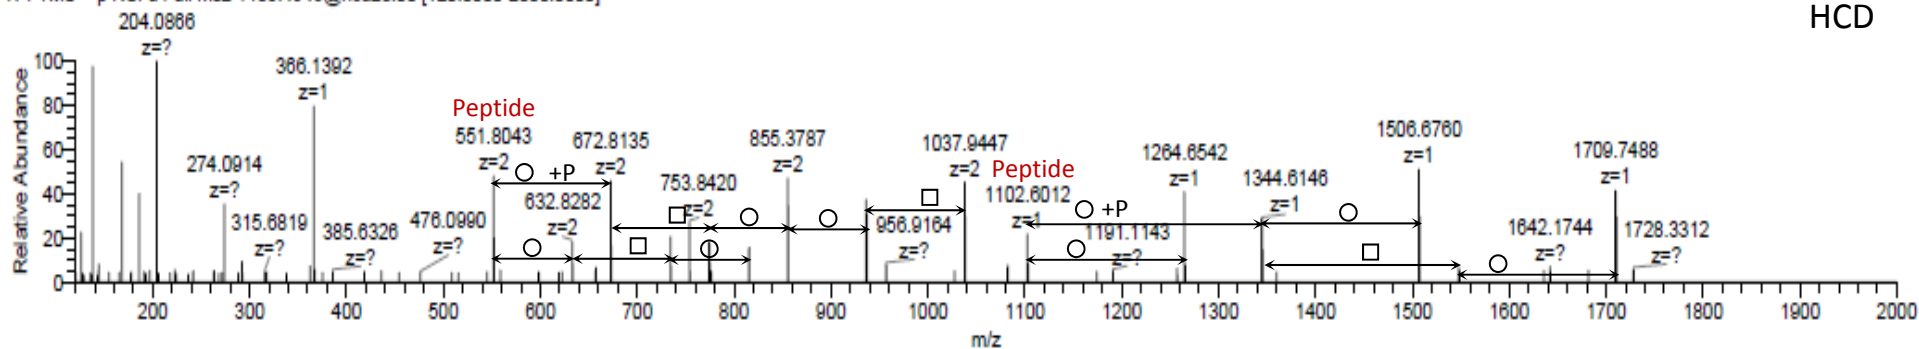

HEK293\_DG373Fc\_3 #7290 RT: 33.66 AV: 1 NL: 2.55E3  
T: ITMS + c NSI r d Full ms2 1183.4946@cid30.00 [320.0000-1999.9999]

MS<sup>2</sup>

CID

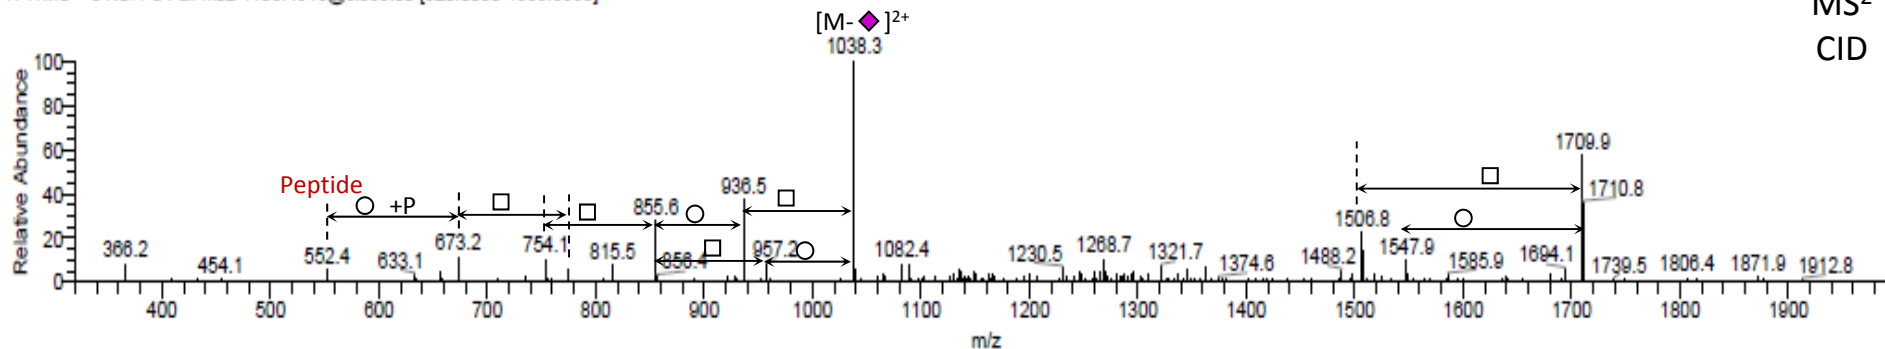

# HCT116-WT<sub>pyr</sub>QIHA<sup>T</sup>TPVR + Hex<sub>2</sub>HexNAC<sub>3</sub>NeuAc<sub>1</sub>P<sub>1</sub>

MS

HCT116\_aDG\_Fc\_WT\_2#10826-11233 RT: 30.93-31.60 AV: 14 NL: 1.64E8  
F: FTMS + p NSI Full ms

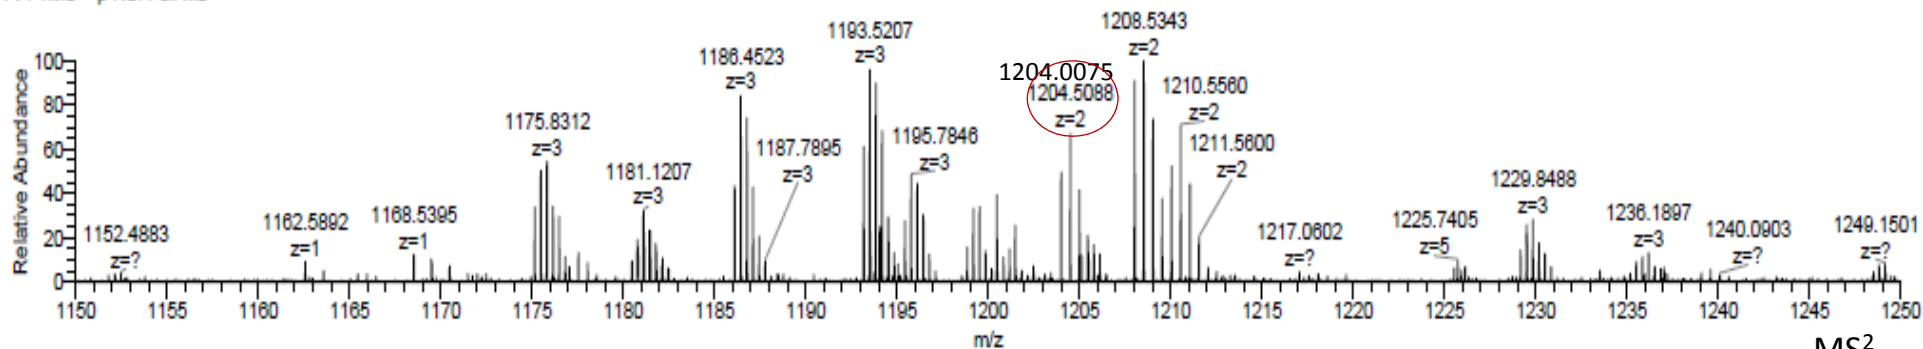

MS<sup>2</sup>

HCD

HCT116\_aDG\_Fc\_WT\_2#11023 RT: 31.27 AV: 1 NL: 1.33E5  
T: FTMS + p NSI d Full ms2 1204.5093@hod28.00 [120.0000-2000.0000]

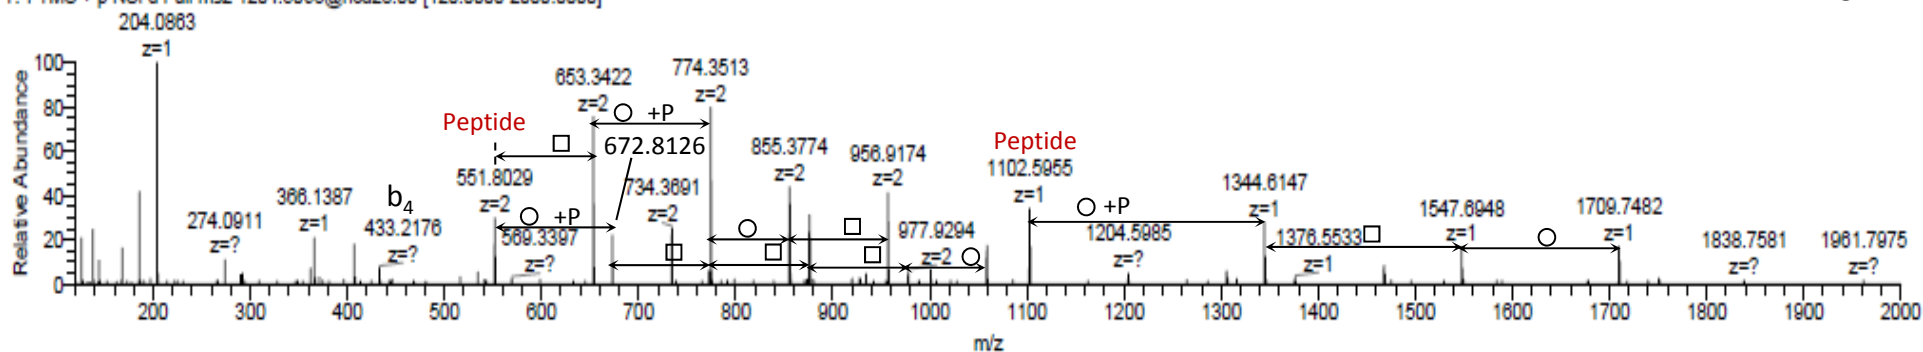

HCT116\_aDG\_Fc\_WT\_2#11026 RT: 31.27 AV: 1 NL: 1.26E4  
T: ITMS + c NSI r d Full ms2 1204.5093@cid30.00 [326.0000-2000.0000]

MS<sup>2</sup>

CID

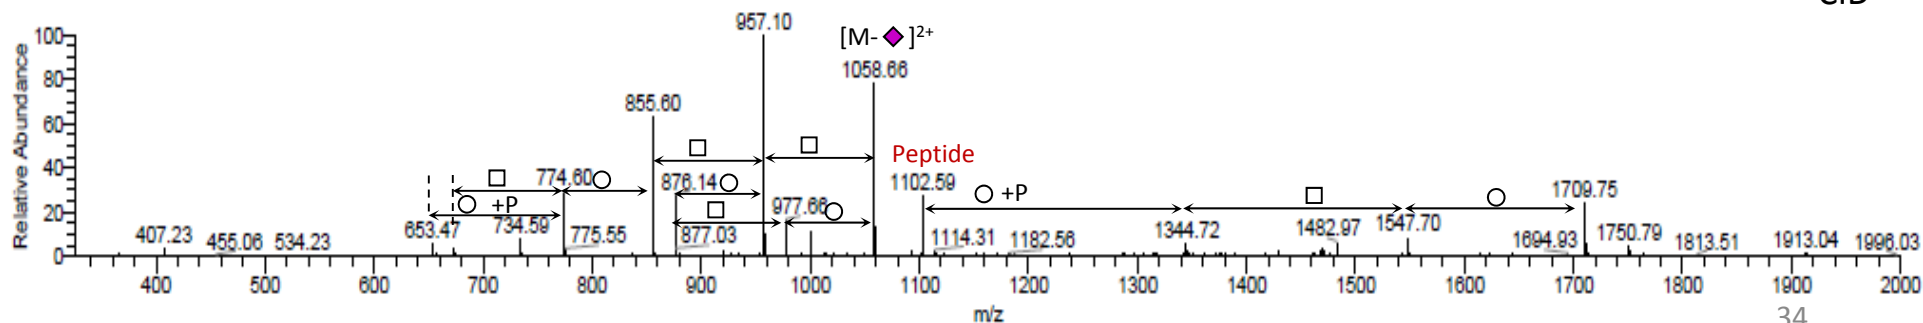

# HEK293-WT<sub>pyr</sub>QIHA<sup>T</sup>TPVR + Hex<sub>3</sub>HexNAC<sub>3</sub>Fuc<sub>1</sub>P<sub>1</sub>

HEK293\_DG373Fc\_3 #4705-4812 RT: 27.58-27.90 AV: 24 NL: 4.35E8  
F: FTMS + p NSI Full ms

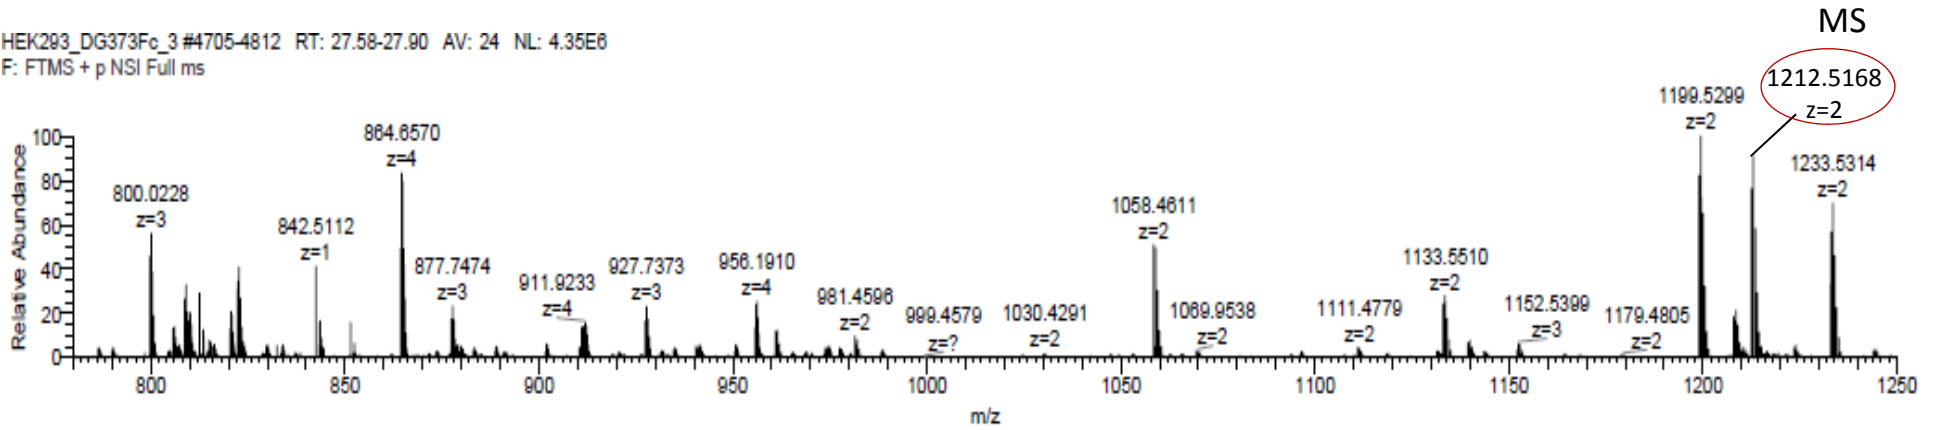

HEK293\_DG373Fc\_3 #4726 RT: 27.62 AV: 1 NL: 8.06E4  
T: FTMS + p NSI d Full ms2 1213.0176@hcd28.00 [120.0000-2000.0000]

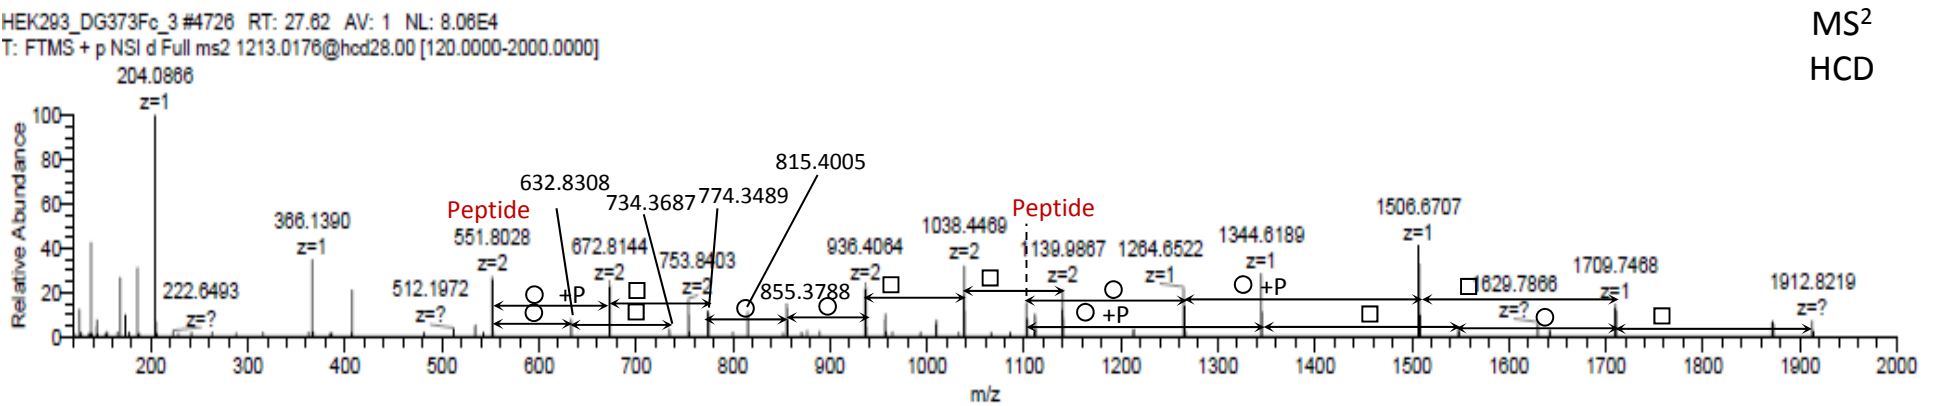

HEK293\_DG373Fc\_3 #4728 RT: 27.63 AV: 1 NL: 4.32E3  
T: ITMS + c NSI r d Full ms2 1213.0176@cid30.00 [328.0000-2000.0000]

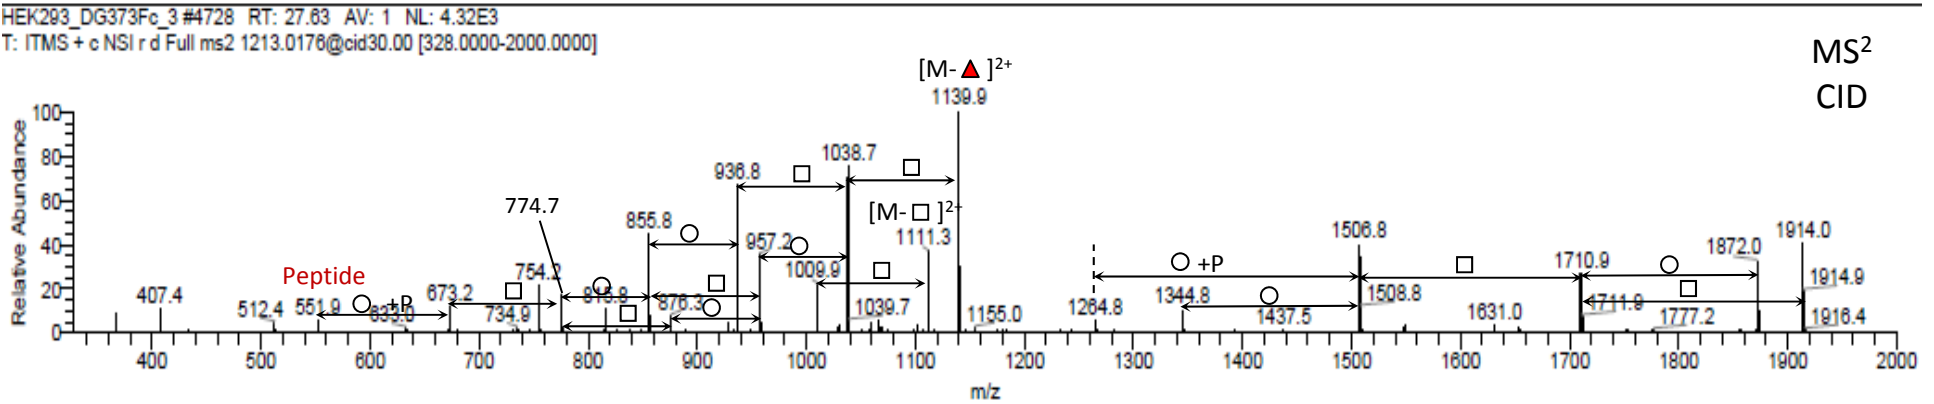

# HEK293-WT<sub>pyr</sub>QIHA<sup>T</sup>TPVR + Hex<sub>2</sub>HexNAC<sub>4</sub>Fuc<sub>1</sub>P<sub>1</sub>

MS

HEK293\_DG373Fc\_2 #3972-4048 RT: 27.48-27.83 AV: 33 NL: 1.48E8  
F: FTMS + p NSI Full ms

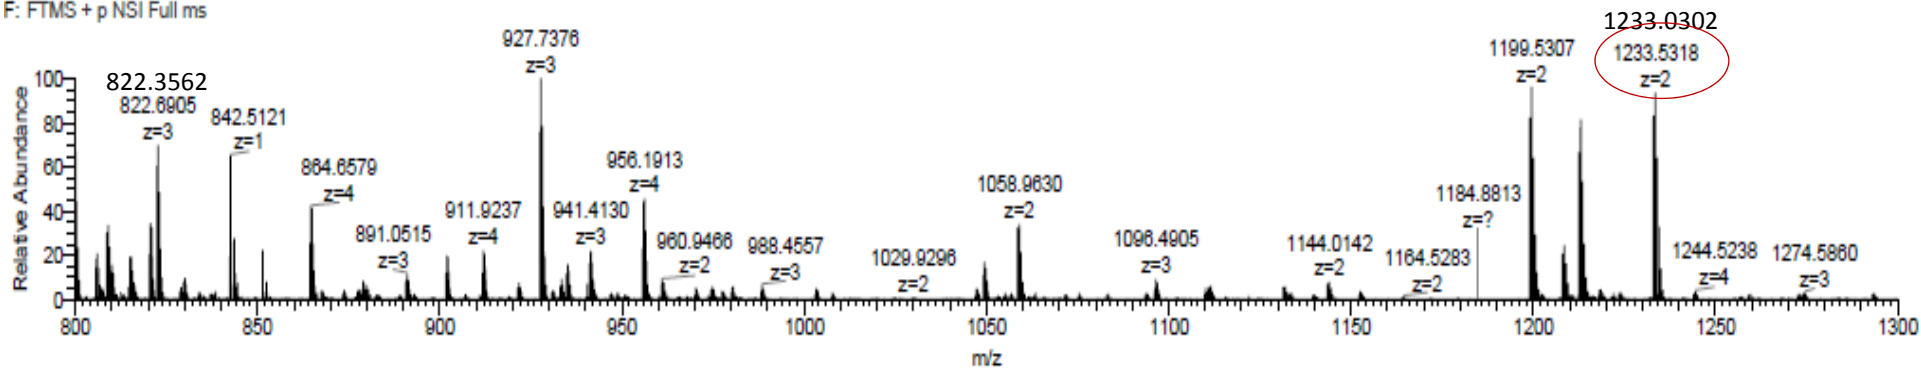

HEK293\_DG373Fc\_2 #3990 RT: 27.54 AV: 1 NL: 1.03E5  
T: FTMS + p NSI d Full ms2 1233.5313@hod28.00 [120.0000-2000.0000]

MS<sup>2</sup>

HCD

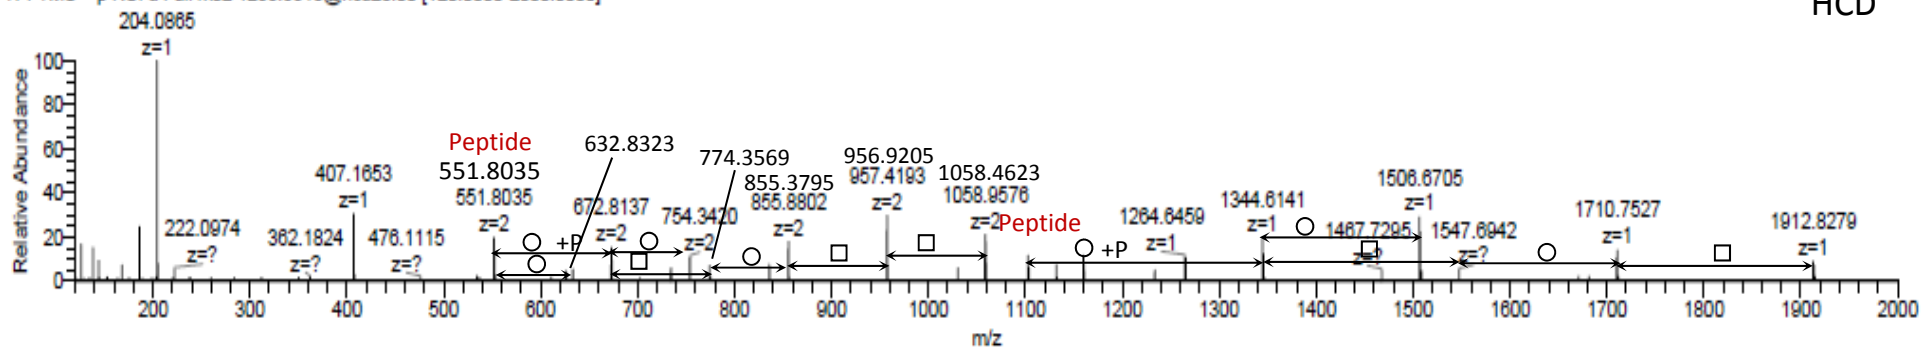

HEK293\_DG373Fc\_2 #3993 RT: 27.54 AV: 1 NL: 4.25E3  
T: ITMS + c NSI r d Full ms2 1233.5313@cid30.00 [334.0000-2000.0000]

MS<sup>2</sup>

CID

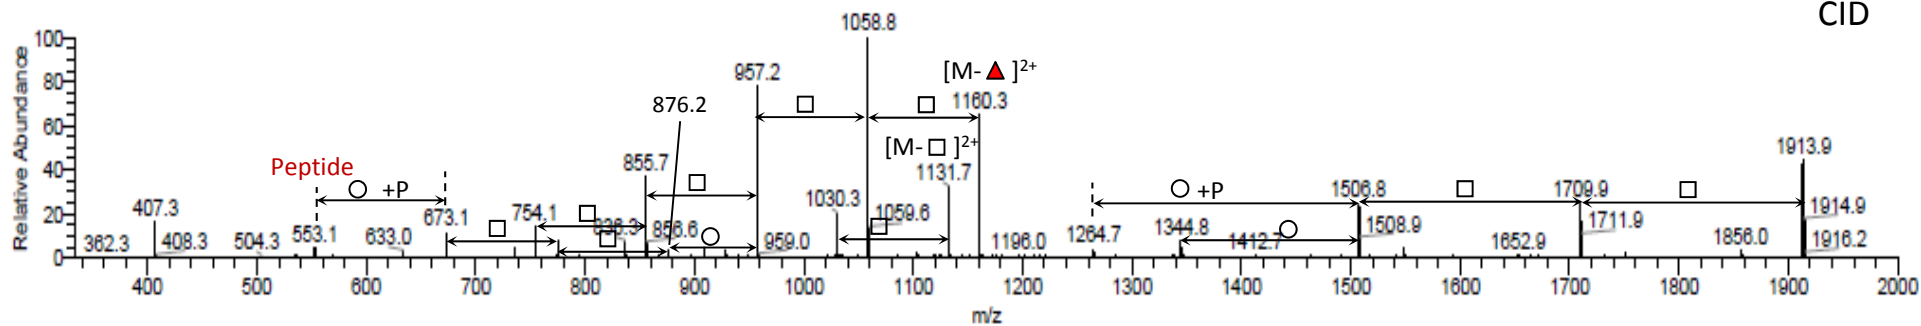

# HEK293-WT<sub>pyr</sub>QIHA<sup>T</sup>TPVR + Hex<sub>2</sub>HexNAC<sub>4</sub>P<sub>3</sub>

MS

HEK293\_DG373Fc\_3 #10282-10435 RT: 41.16-41.71 AV: 41 NL: 4.12E6  
F: FTMS + p NSI Full ms

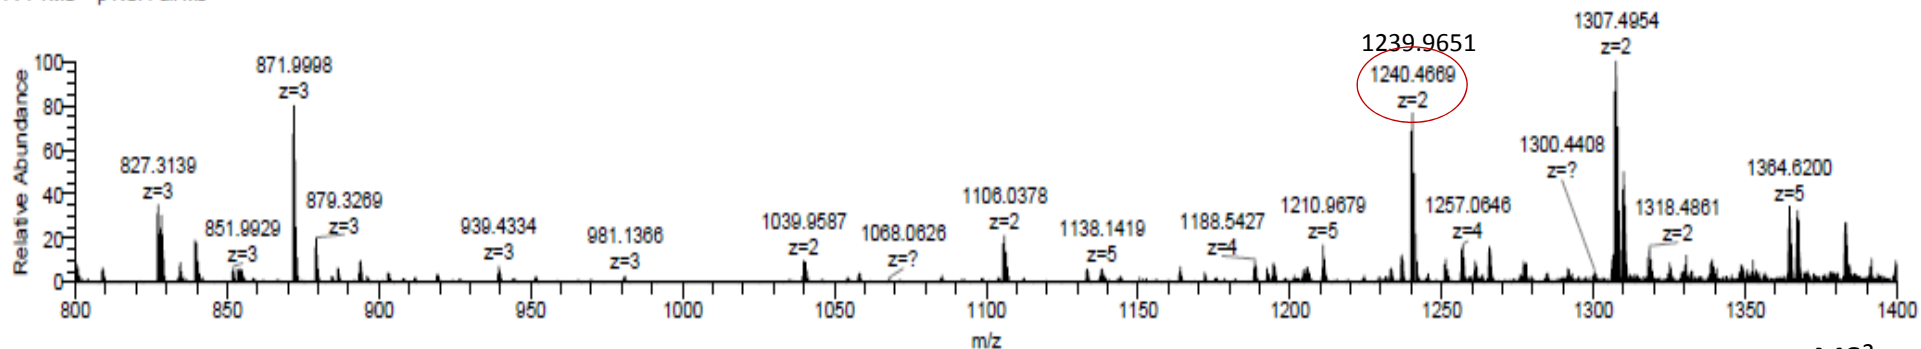

MS<sup>2</sup>

HCD

HEK293\_DG373Fc\_3 #10349 RT: 41.42 AV: 1 NL: 1.28E5  
T: FTMS + p NSI d Full ms2 1240.4664@hcd28.00 [120.0000-2000.0000]

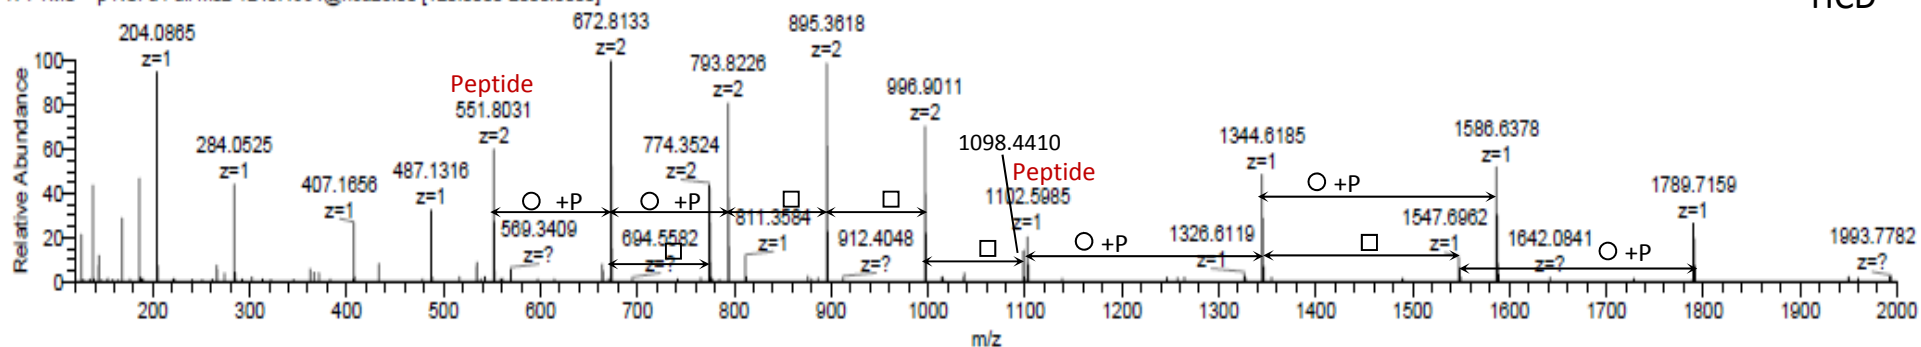

MS<sup>2</sup>

CID

HEK293\_DG373Fc\_3 #10352 RT: 41.42 AV: 1 NL: 1.55E4  
T: ITMS + c NSI r d Full ms2 1240.4664@cid30.00 [336.0000-2000.0001]

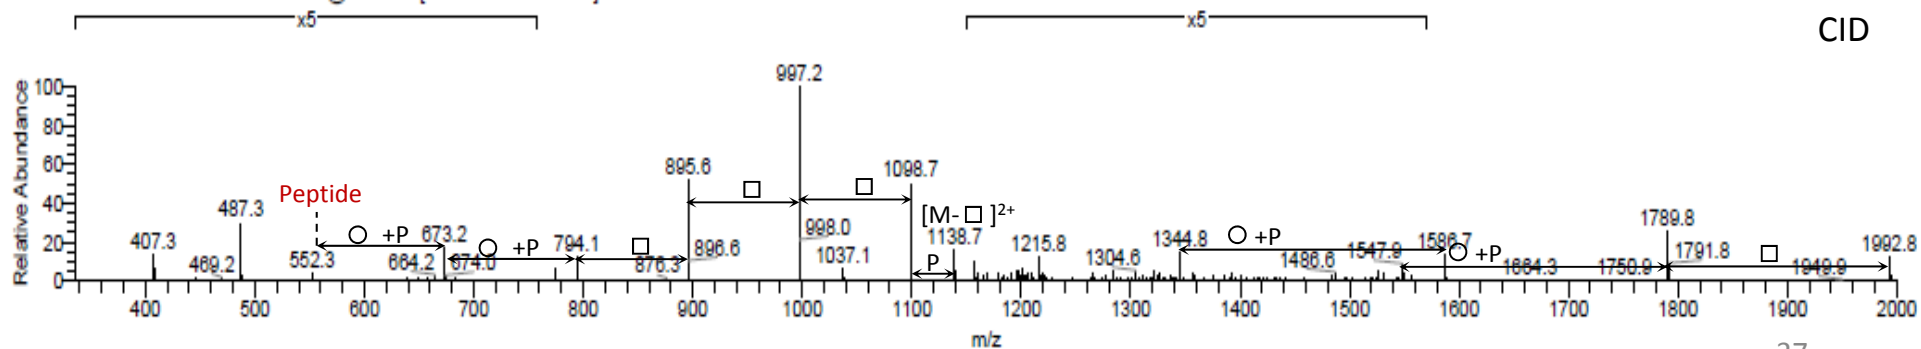

# HEK293-WT<sub>pyr</sub>QIHA<sup>T</sup>TPVR + Hex<sub>3</sub>HexNAc<sub>4</sub>P<sub>1</sub>

MS

HEK293\_DG373Fc\_2#3783-3850 RT: 26.51-26.88 AV: 37 NL: 1.43E8  
F: FTMS + p NSI Full ms

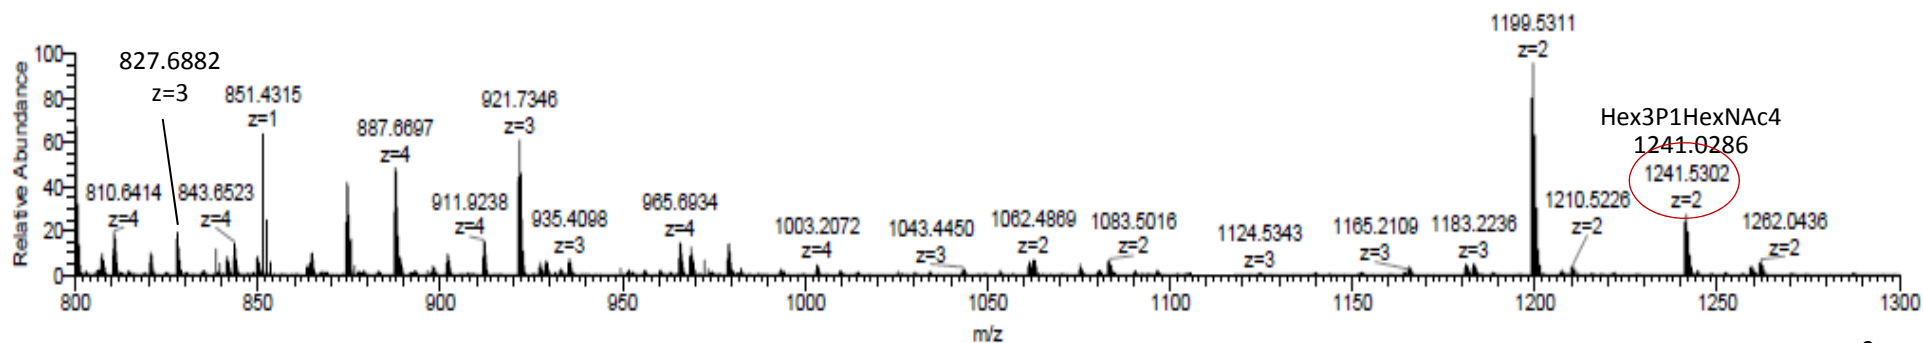

HEK293\_DG373Fc\_2#3812 RT: 26.66 AV: 1 NL: 2.80E4  
T: FTMS + p NSI d Full ms2 1241.5293@hcd28.00 [120.0000-2000.0000]

MS<sup>2</sup>

HCD

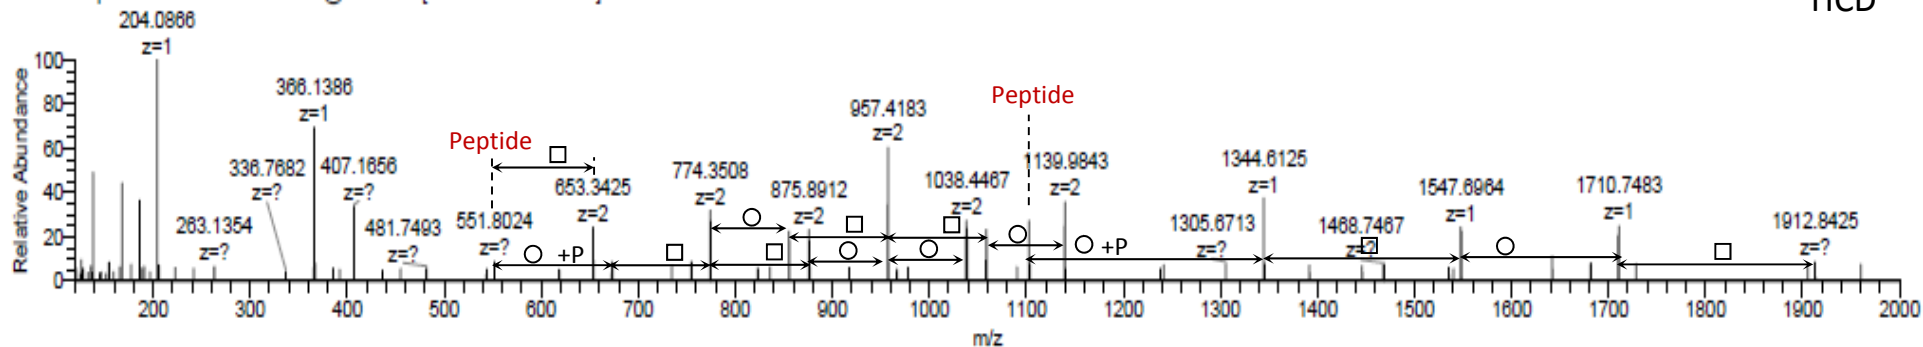

HEK293\_DG373Fc\_2#3813 RT: 26.66 AV: 1 NL: 1.00E3  
T: ITMS + c NSI r d Full ms2 1241.5293@cid30.00 [338.0000-2000.0000]

MS<sup>2</sup>

CID

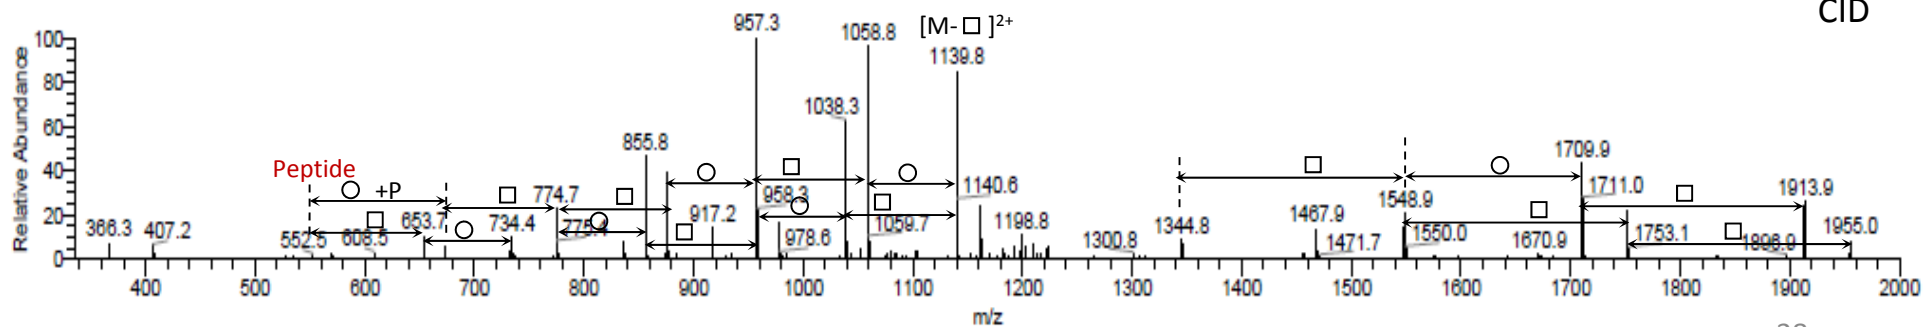

# HEK293-WT<sub>pyr</sub>QIHA**T**TPVR + Hex<sub>2</sub>HexNAC<sub>5</sub>P<sub>1</sub>

MS

HEK293\_DG373Fc\_3 #4352-4471 RT: 26.61-27.02 AV: 34 NL: 3.77E6  
F: FTMS + p NSI Full ms

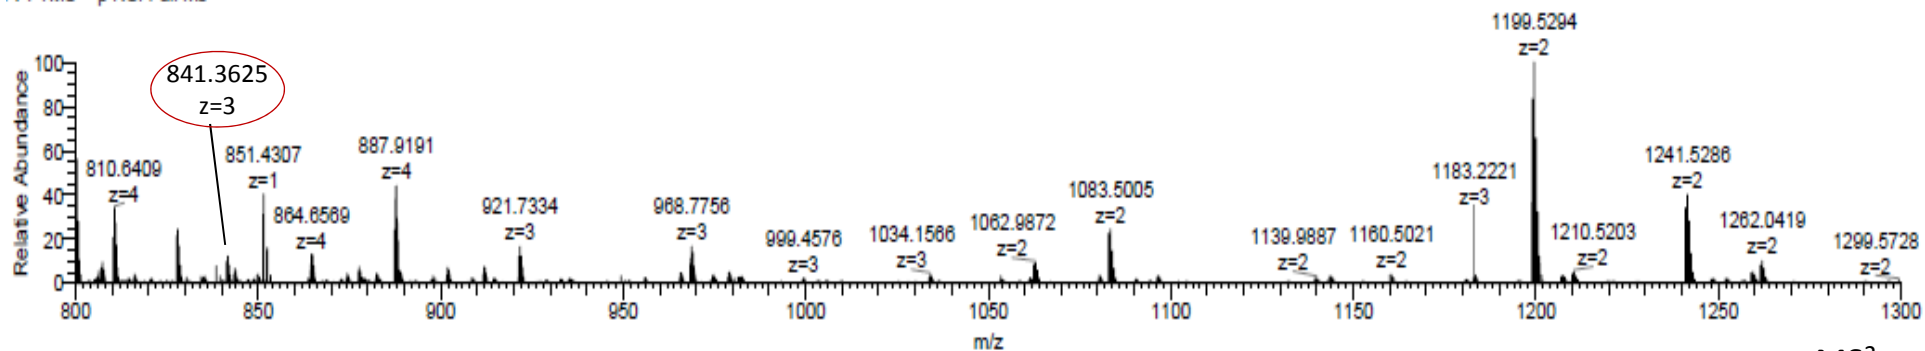

MS<sup>2</sup>

HCD

HEK293\_DG373Fc\_3 #4388 RT: 26.77 AV: 1 NL: 1.23E5  
T: FTMS + p NSI d Full ms2 841.8971@hod28.00 [120.0000-2000.0000]

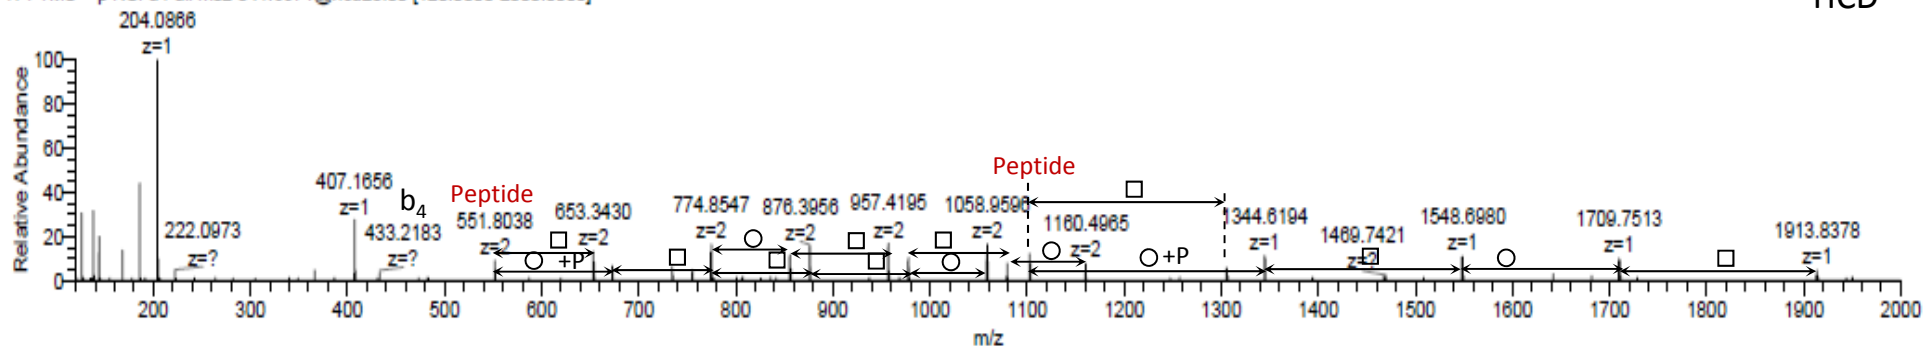

HEK293\_DG373Fc\_3 #4391 RT: 26.77 AV: 1 NL: 1.23E4  
T: ITMS + c NSI r d Full ms2 841.8971@cid30.00 [228.0000-1999.9999]

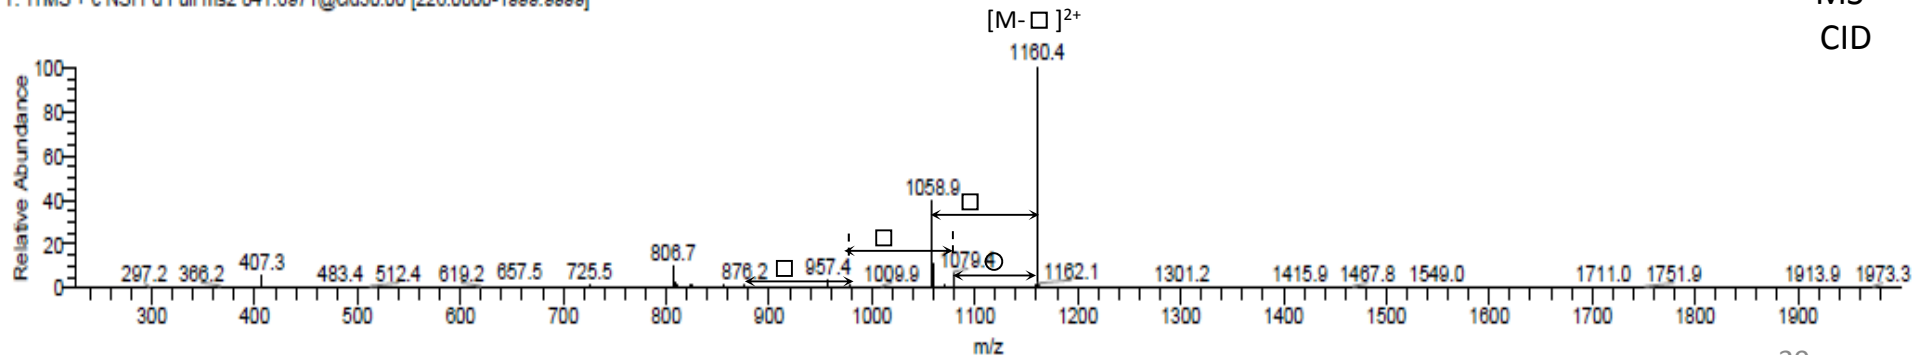

MS<sup>2</sup>

CID

# HEK293-WT<sub>pyr</sub>QIHA<sup>T</sup>TPVR + Hex<sub>3</sub>HexNAC<sub>3</sub>NeuAc<sub>1</sub>P<sub>1</sub>

MS

HEK293\_DG373Fc\_2 #5468-5588 RT: 33.50-33.78 AV: 18 NL: 4.80E6  
F: FTMS + p NSI Full ms

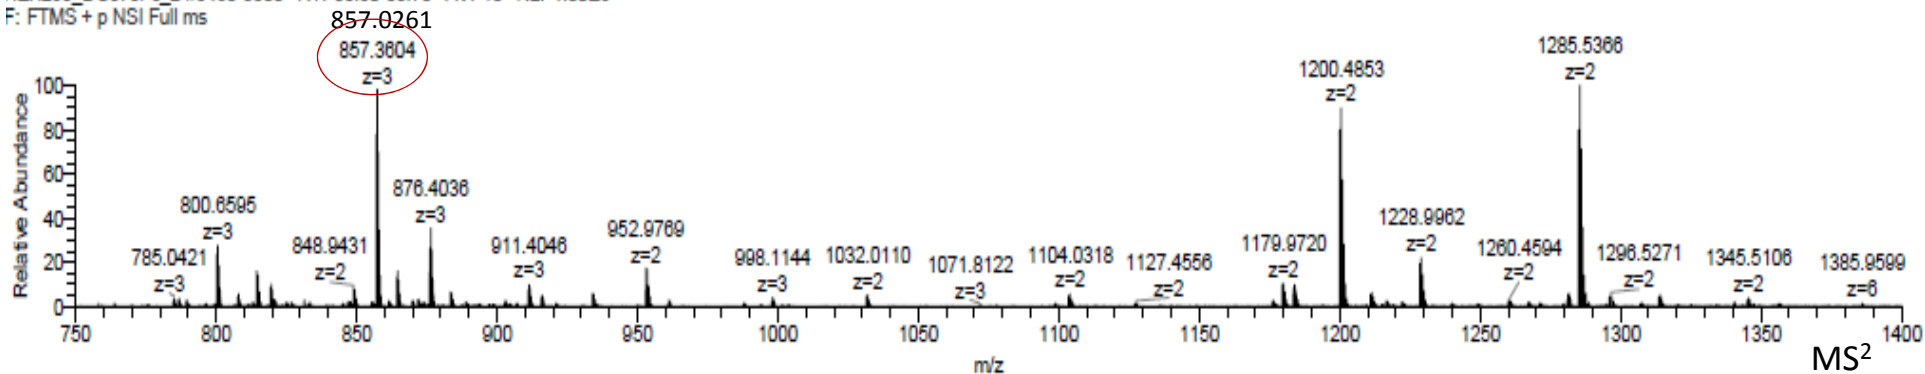

MS<sup>2</sup>  
HCD

HEK293\_DG373Fc\_2 #5484 RT: 33.53 AV: 1 NL: 3.54E5  
T: FTMS + p NSI d Full ms2 857.3607@hod28.00 [120.0000-2000.0000]

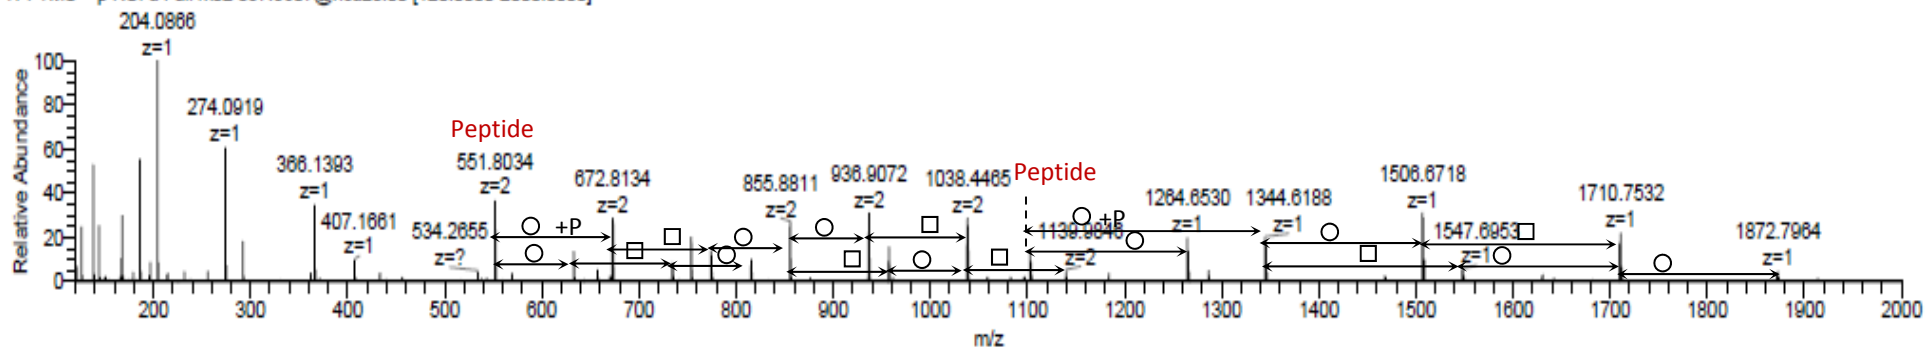

HEK293\_DG373Fc\_2 #5487 RT: 33.53 AV: 1 NL: 7.27E4  
T: ITMS + c NSI r d Full ms2 857.3607@cid30.00 [231.0000-2000.0000]

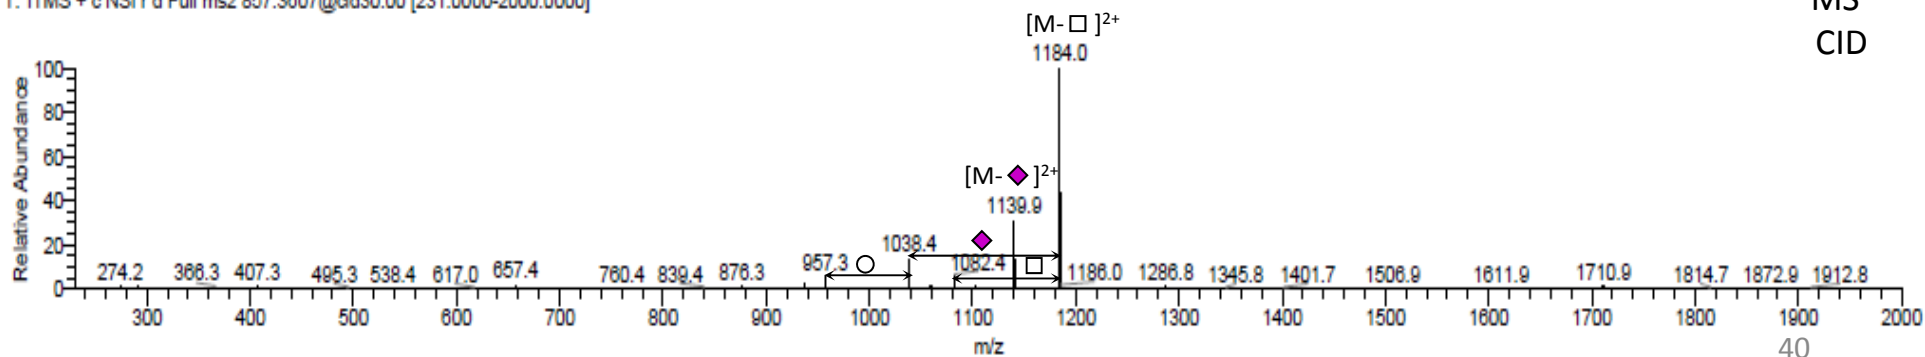

MS<sup>2</sup>  
CID



# HCT116- $\Delta$ ISPD<sub>pyr</sub>QIHA<sup>T</sup>TPVR + Hex<sub>4</sub>HexNAc<sub>4</sub>P<sub>1</sub>

MS

1-1\_ISPD\_aDG373Fc\_T322R#9996-10193 RT: 27.73-28.04 AV: 7 NL: 1.10E8  
F: FTMS + p NSI Full ms

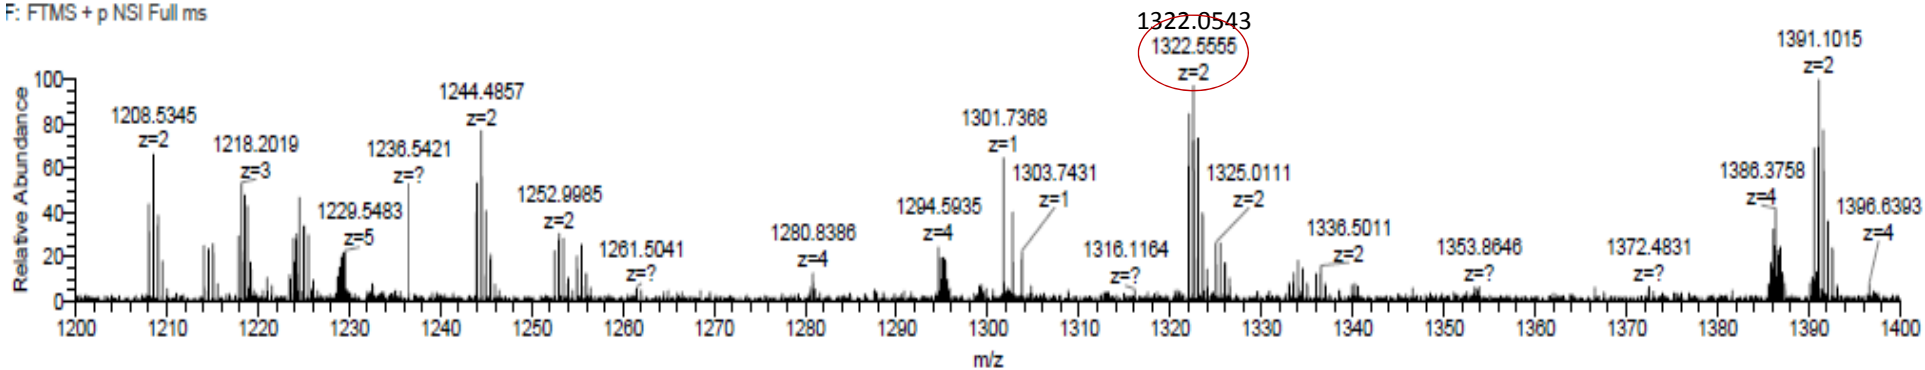

MS<sup>2</sup>  
HCD

1-1\_ISPD\_aDG373Fc\_T322R#10098 RT: 27.89 AV: 1 NL: 2.89E4  
T: FTMS + p NSI d Full ms2 1322.5557@hod28.00 [120.0000-2000.0000]

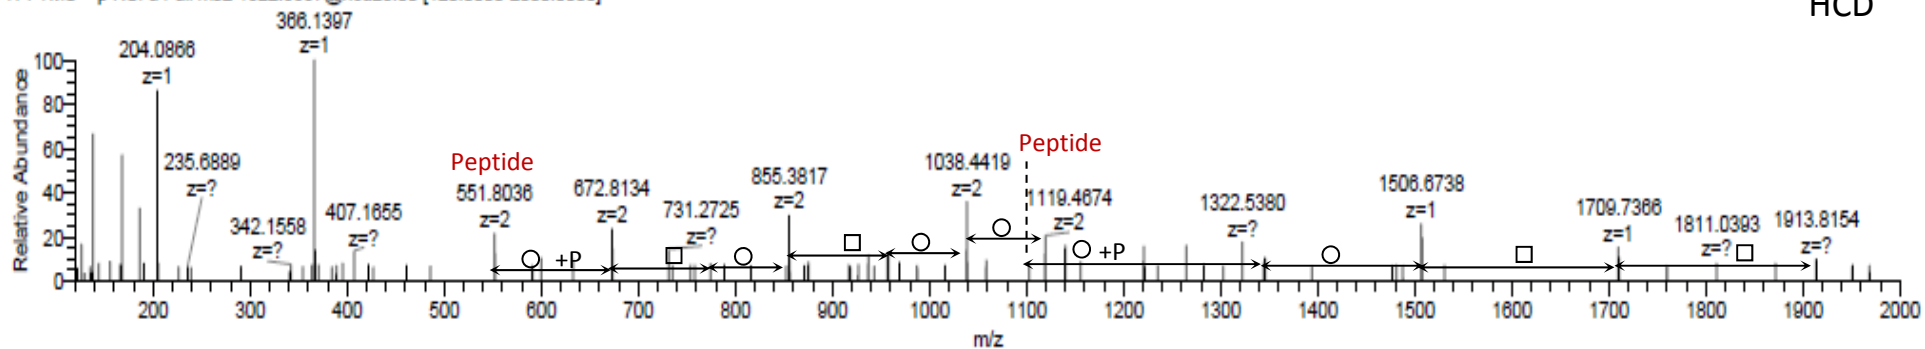

1-1\_ISPD\_aDG373Fc\_T322R#10101 RT: 27.90 AV: 1 NL: 1.22E3  
T: FTMS + c NSI r d Full ms2 1322.5557@cid30.00 [359.0000-2000.0000]

MS<sup>2</sup>  
CID

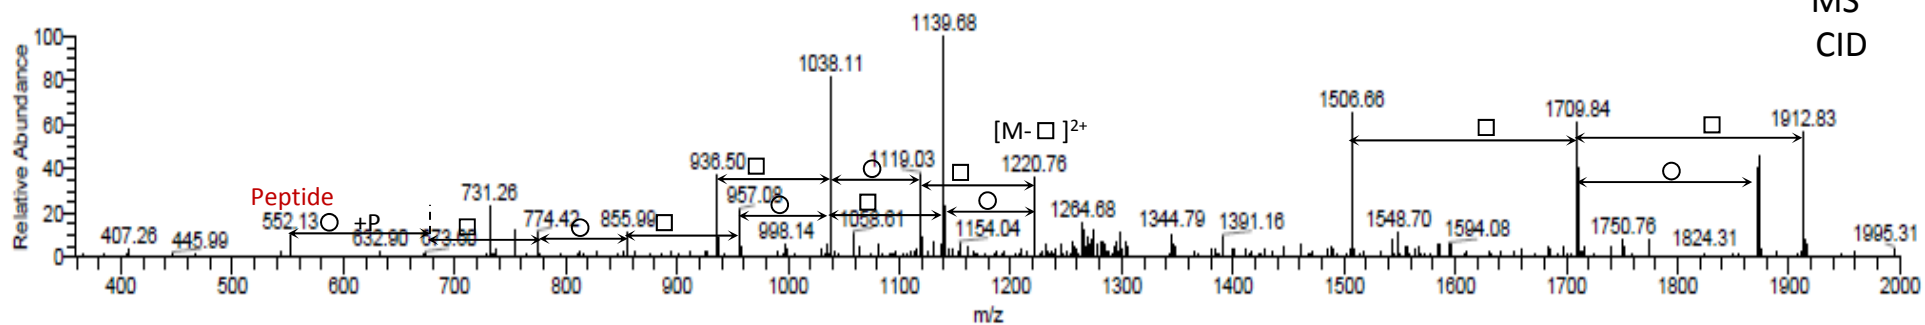

# HEK293-WT<sub>pyr</sub>QIHA<sup>T</sup>TPVR + Hex<sub>2</sub>HexNAC<sub>3</sub>NeuAc<sub>2</sub>P<sub>1</sub>

HEK293\_DG373Fc\_3 #8634-9057 RT: 36.90-38.05 AV: 71 NL: 1.52E6  
F: FTMS + p NSI Full ms

MS

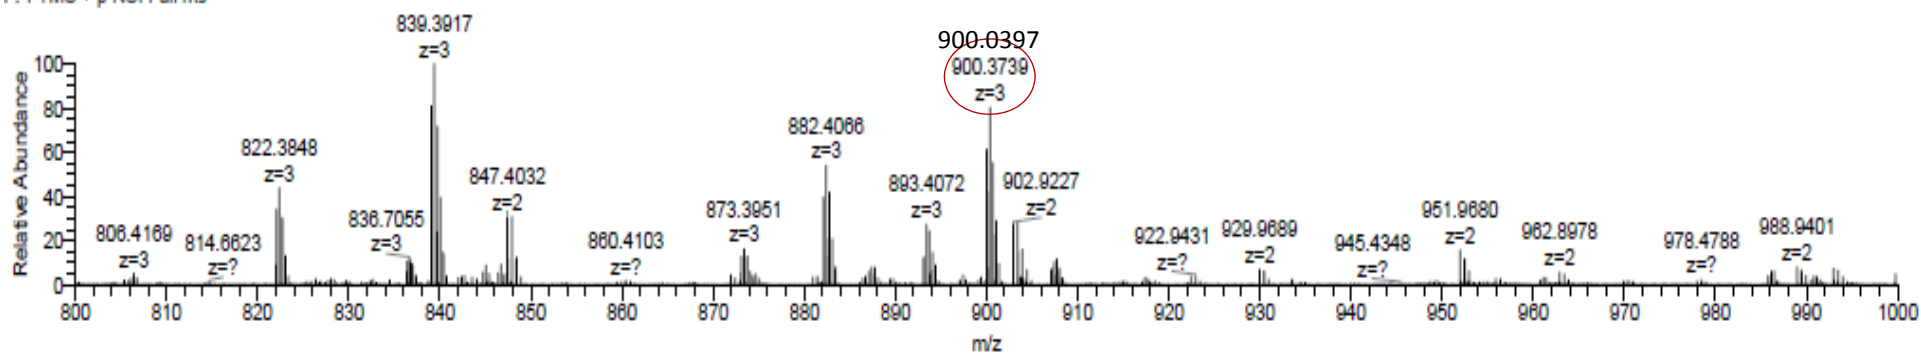

HEK293\_DG373Fc\_3 #8969 RT: 37.76 AV: 1 NL: 4.49E4  
T: FTMS + p NSI d Full ms2 900.3742@hod28.00 [120.0000-2000.0000]

MS<sup>2</sup>  
HCD

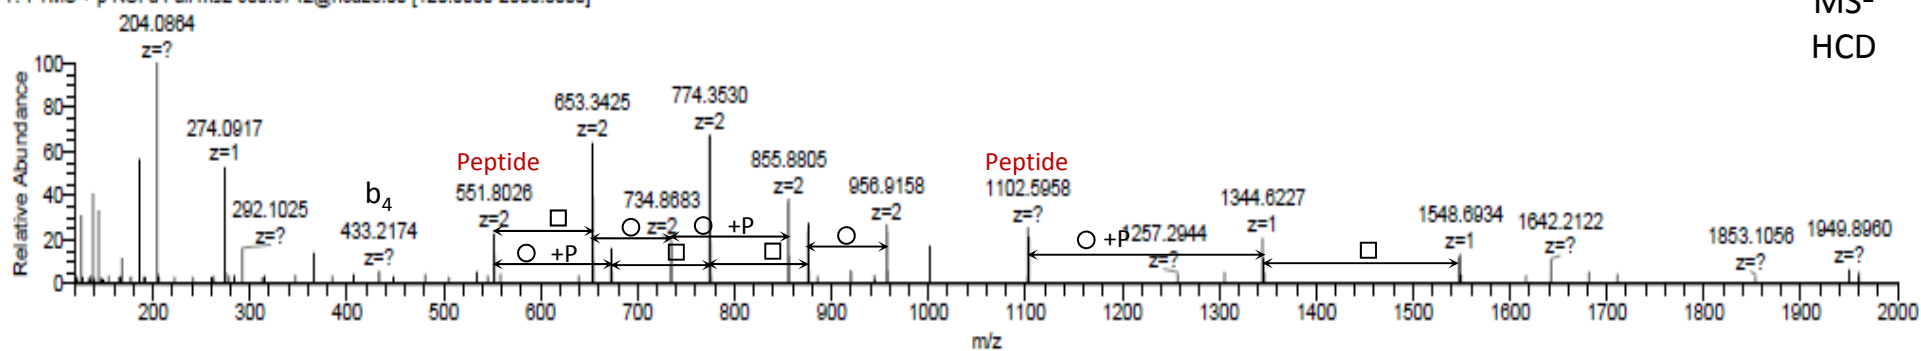

HEK293\_DG373Fc\_3 #8971 RT: 37.76 AV: 1 NL: 4.22E3  
T: ITMS + c NSI r d Full ms2 900.3742@cid30.00 [242.0000-2000.0000]

MS<sup>2</sup>  
CID

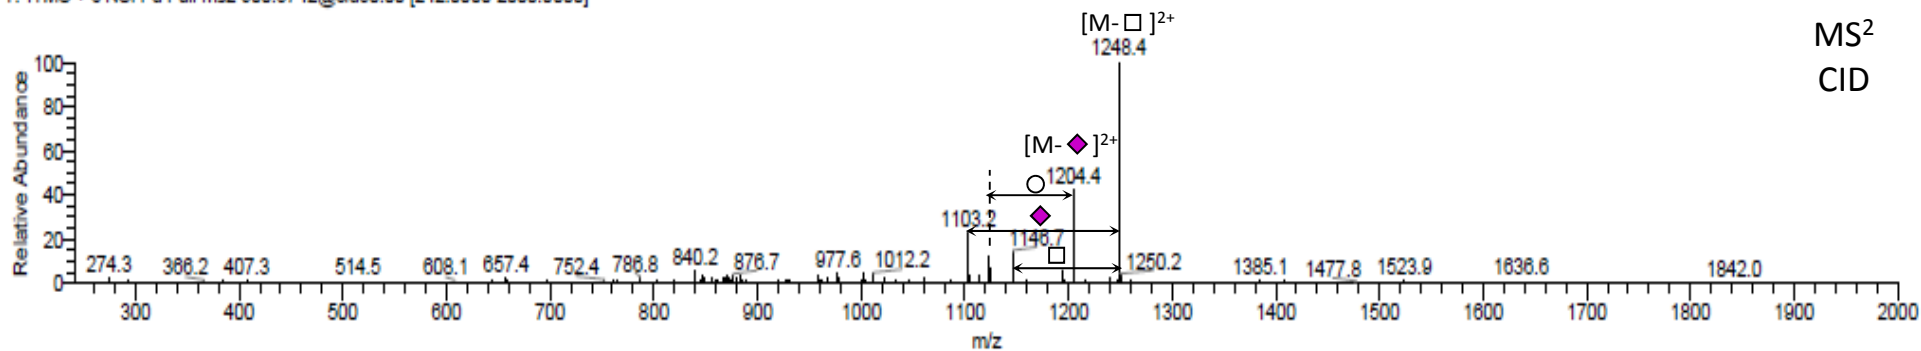

# HCT116-WT<sub>pyr</sub>QIHA<sup>T</sup>TPVR + Hex<sub>4</sub>HexNAC<sub>4</sub>NeuAc<sub>1</sub>P<sub>1</sub>

MS

HCT116\_aDG\_Fc\_WT\_2#11574 RT: 32.21 AV: 1 NL: 7.78E6  
F: FTMS + p NSI Full ms

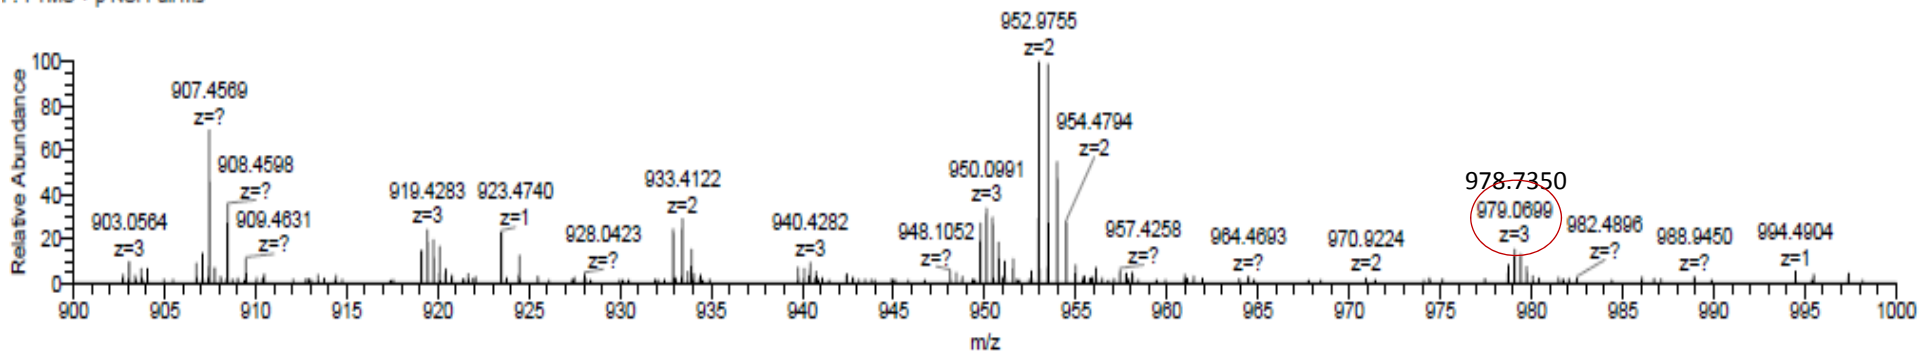

HCT116\_aDG\_Fc\_WT\_2#11628 RT: 32.30 AV: 1 NL: 1.11E5  
T: FTMS + p NSI d Full ms2 979.0699@hed28.00 [120.0000-2000.0000]

MS<sup>2</sup>  
HCD

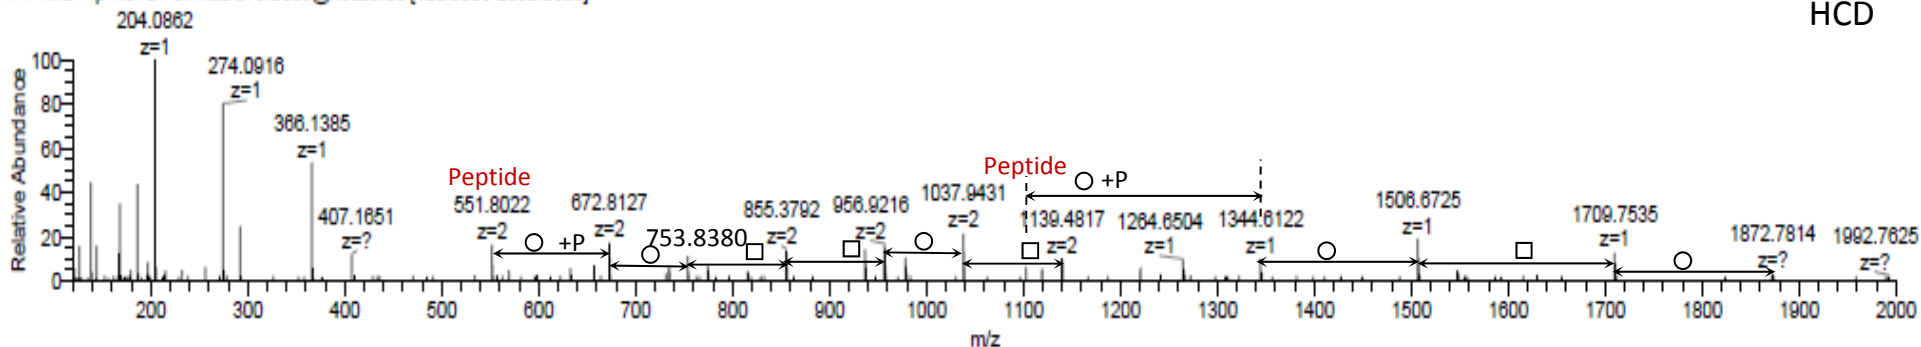

HCT116\_aDG\_Fc\_WT\_2#11631 RT: 32.31 AV: 1 NL: 1.53E4  
T: ITMS + c NSI r d Full ms2 979.0699@cid30.00 [264.0000-2000.0000]

MS<sup>2</sup>  
CID

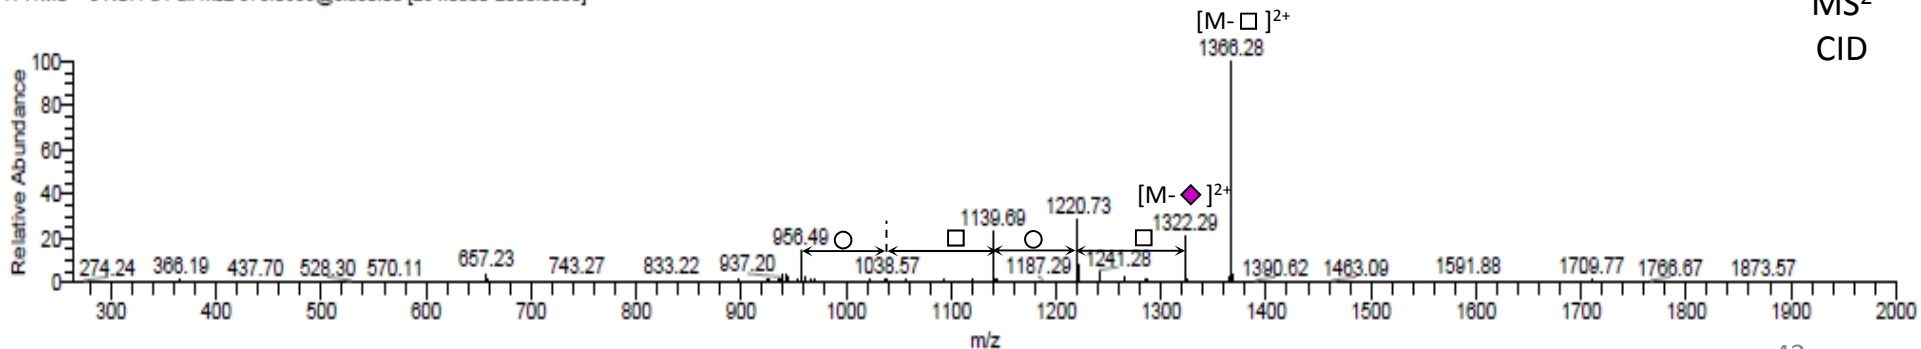

# HCT116- $\Delta$ FKRP<sub>pyr</sub>QIHA<sup>T</sup>TPVR + Hex<sub>1</sub>HexNAc<sub>2</sub>P<sub>1</sub>RboP<sub>1</sub>

MS

2-1\_FKRP\_aDG373Fc\_T322R #13086-13238 RT: 36.41-36.61 AV: 5 NL: 8.12E5  
F: FTMS + p NSI Full ms

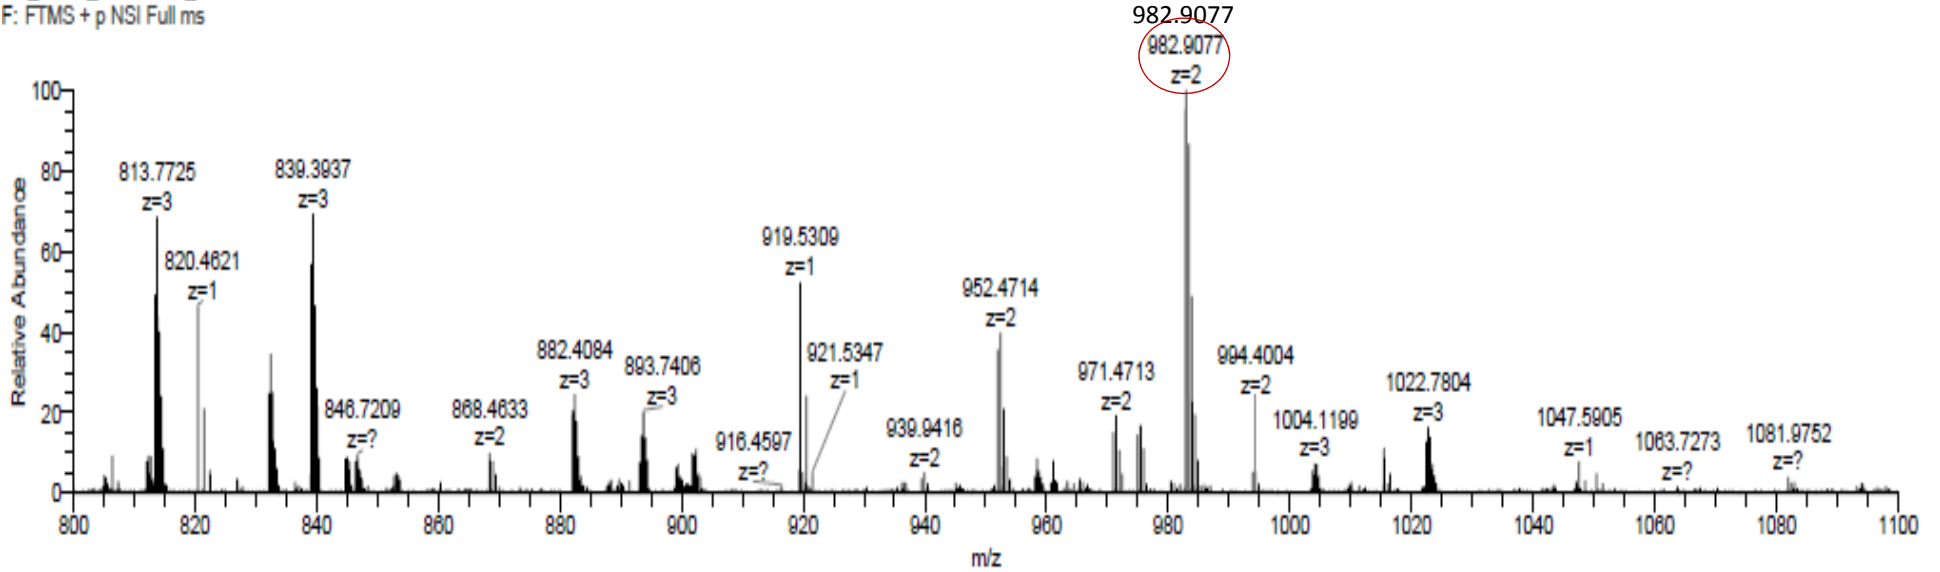

2-1\_FKRP\_aDG373Fc\_T322R #13119 RT: 36.47 AV: 1 NL: 4.59E5  
T: FTMS + p NSI d Full ms2 983.4106@hed28.00 [120.0000-1977.0000]

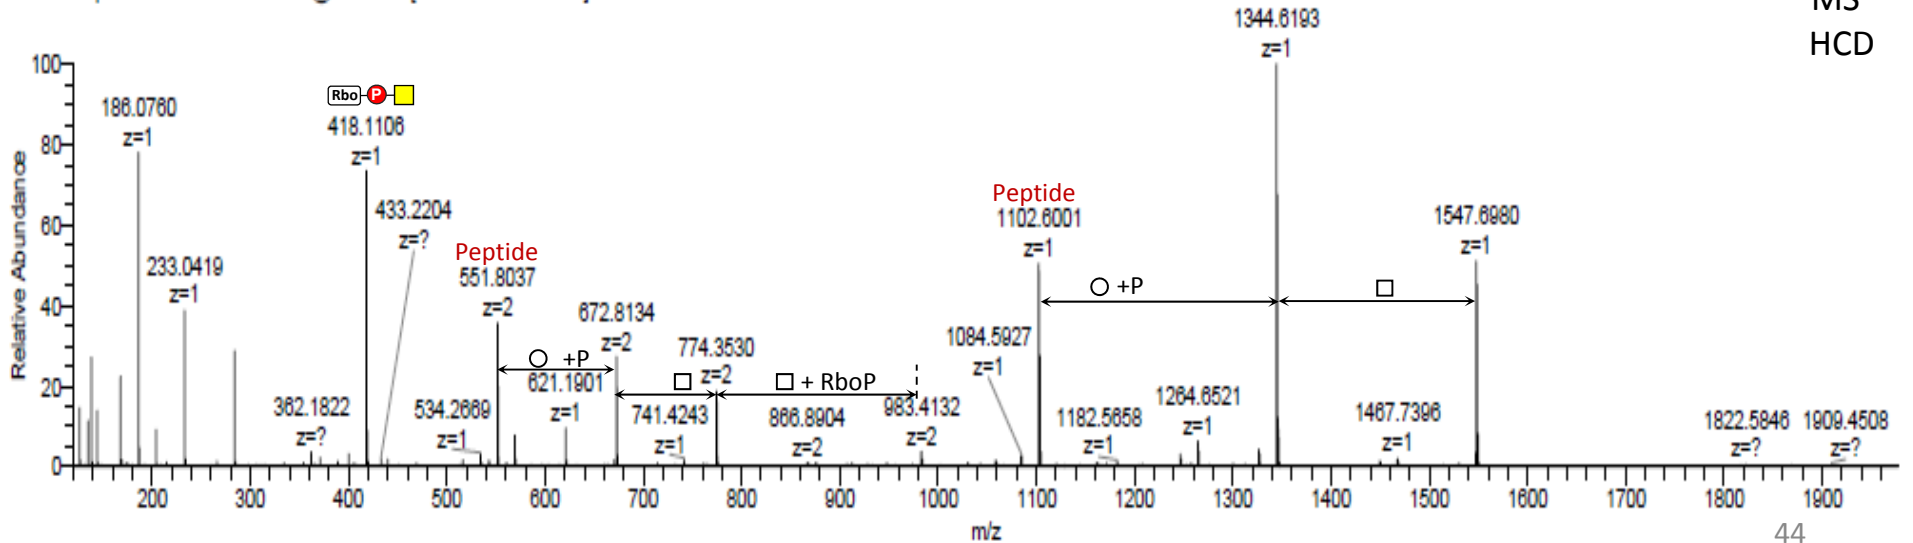

MS<sup>2</sup>  
HCD

# HCT116- $\Delta$ FKRP<sub>pyr</sub>QIHA<sup>T</sup>TPVR + Hex<sub>2</sub>HexNac<sub>2</sub>P<sub>1</sub>RboP<sub>1</sub>

MS

2-1\_FKRP\_aDG373Fc\_T322R #11335-11496 RT: 33.58-33.82 AV: 6 NL: 1.90E6  
F: FTMS + p NSI Full ms

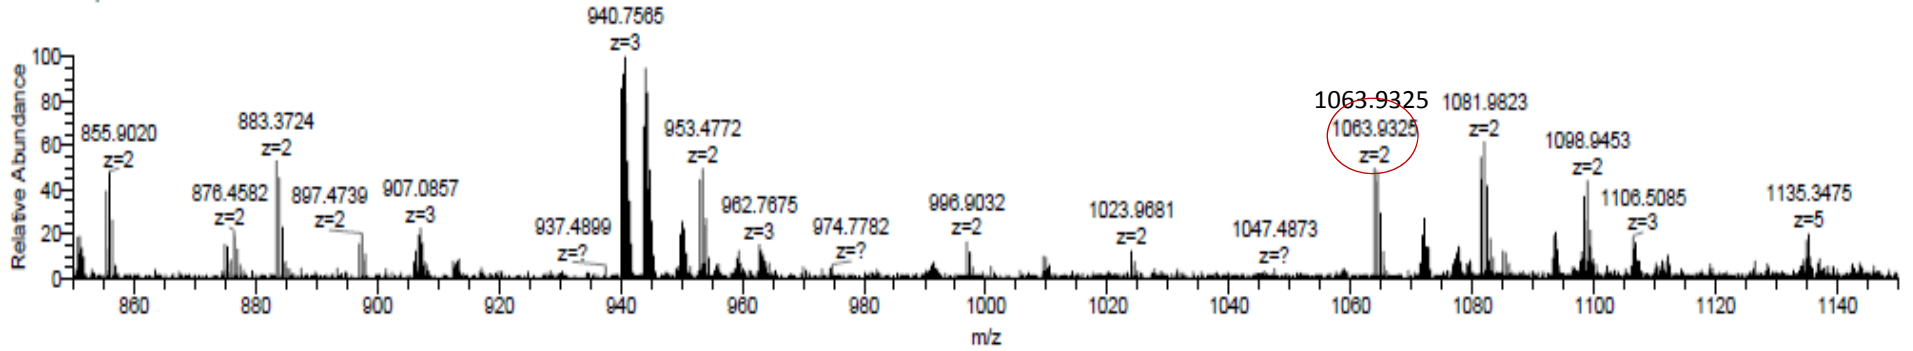

2-1\_FKRP\_aDG373Fc\_T322R #11406 RT: 33.69 AV: 1 NL: 6.98E4  
T: FTMS + p NSI d Full ms2 1064.4342@hcd28.00 [120.0000-2000.0000]

MS<sup>2</sup>  
HCD

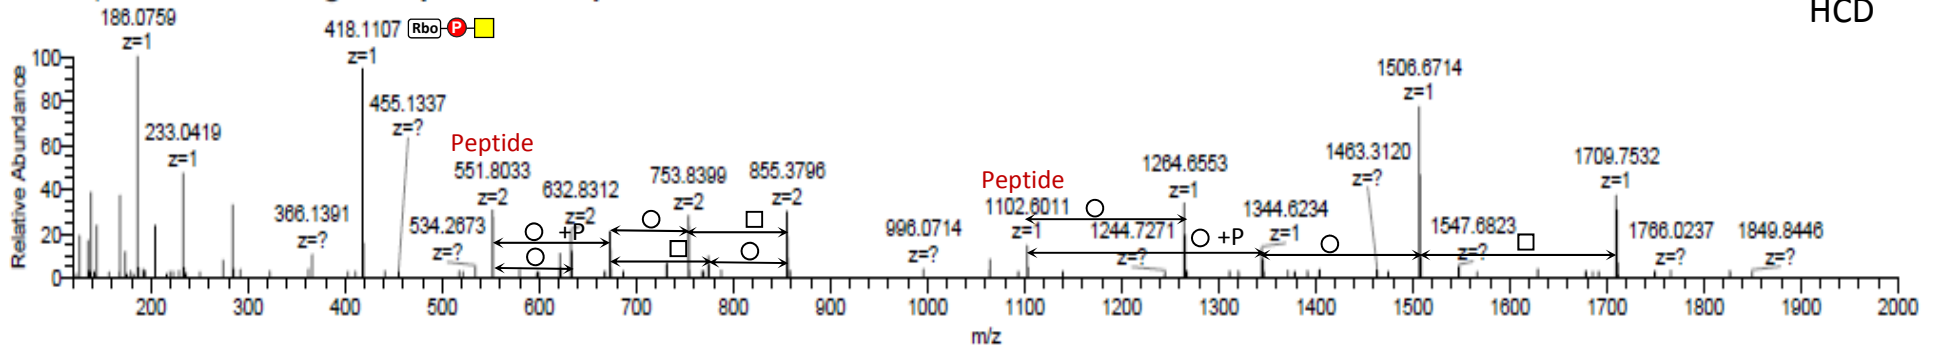

2-1\_FKRP\_aDG373Fc\_T322R #11409 RT: 33.69 AV: 1 NL: 4.65E3  
T: FTMS + c NSI r d Full ms2 1064.4342@cid30.00 [288.0000-2000.0000]

MS<sup>2</sup>  
CID

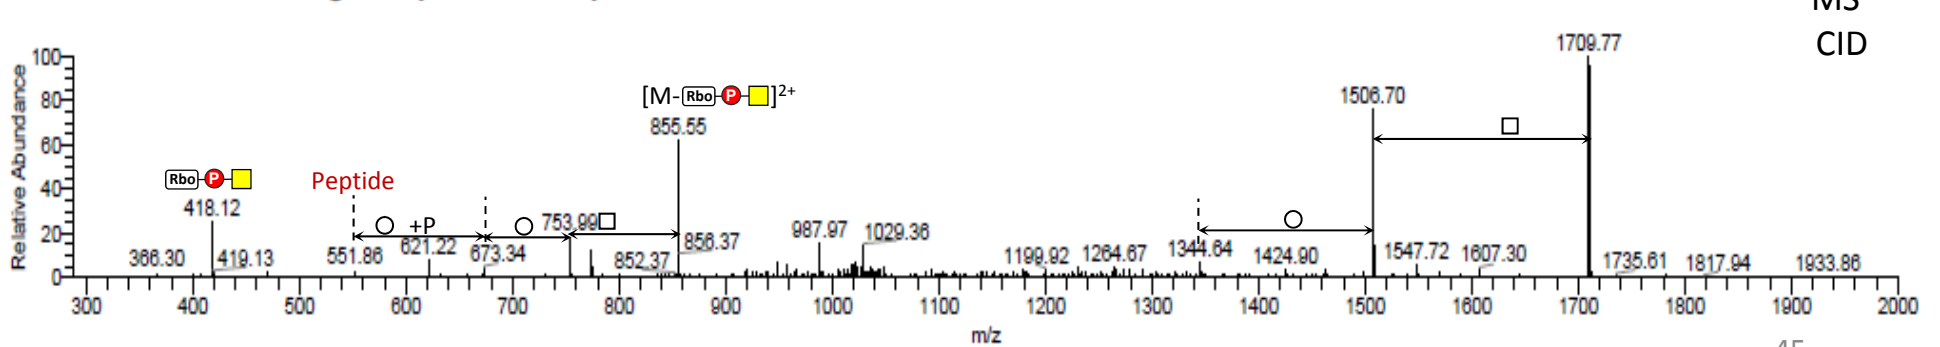

# HCT116- $\Delta$ FKRP<sub>pyr</sub>QIHA $\overline{\text{TP}}$ PVR + Hex<sub>2</sub>HexNac<sub>3</sub>P<sub>1</sub>RboP<sub>1</sub>

MS

2-1\_FKRP\_aDG373Fc\_T322R #9925-10218 RT: 31.34-31.79 AV: 10 NL: 5.28E8  
F: FTMS + p NSI Full ms

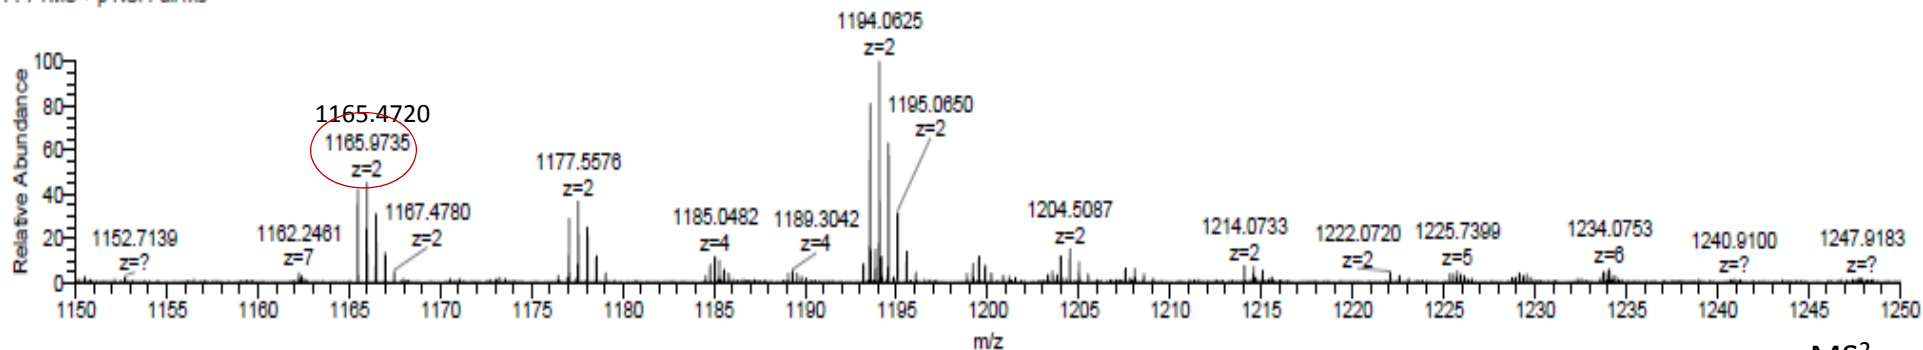

2-1\_FKRP\_aDG373Fc\_T322R #10012 RT: 31.47 AV: 1 NL: 6.62E4  
T: FTMS + p NSI d Full ms2 1165.4718@hcd28.00 [120.0000-2000.0000]

MS<sup>2</sup>  
HCD

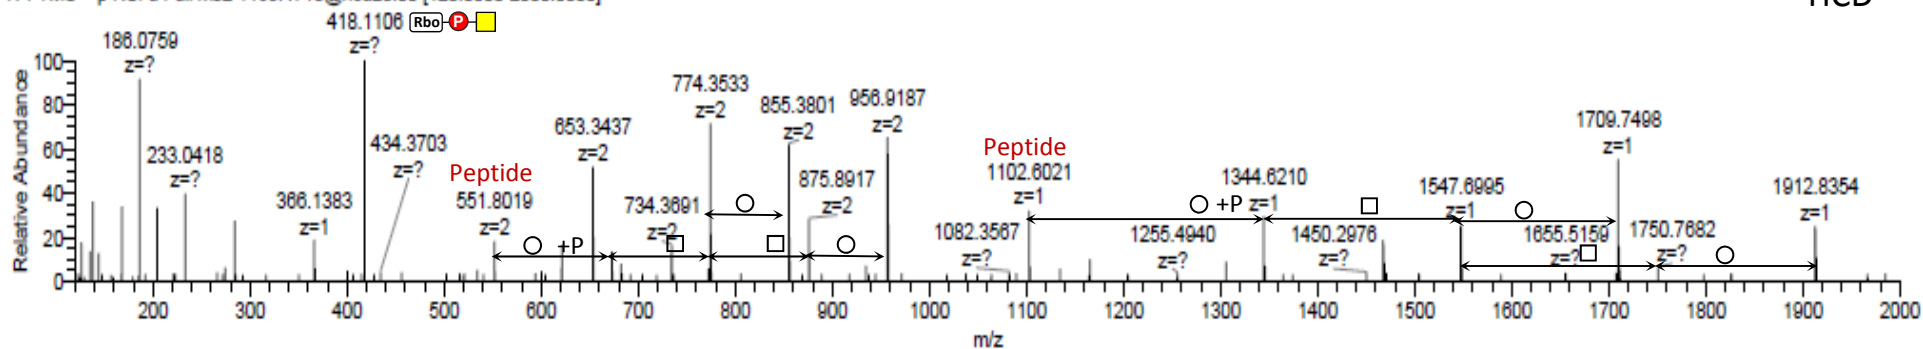

2-1\_FKRP\_aDG373Fc\_T322R #10015 RT: 31.47 AV: 1 NL: 5.12E3  
T: FTMS + c NSI rd Full ms2 1165.4718@cid30.00 [315.0000-2000.0000]

MS<sup>2</sup>  
CID

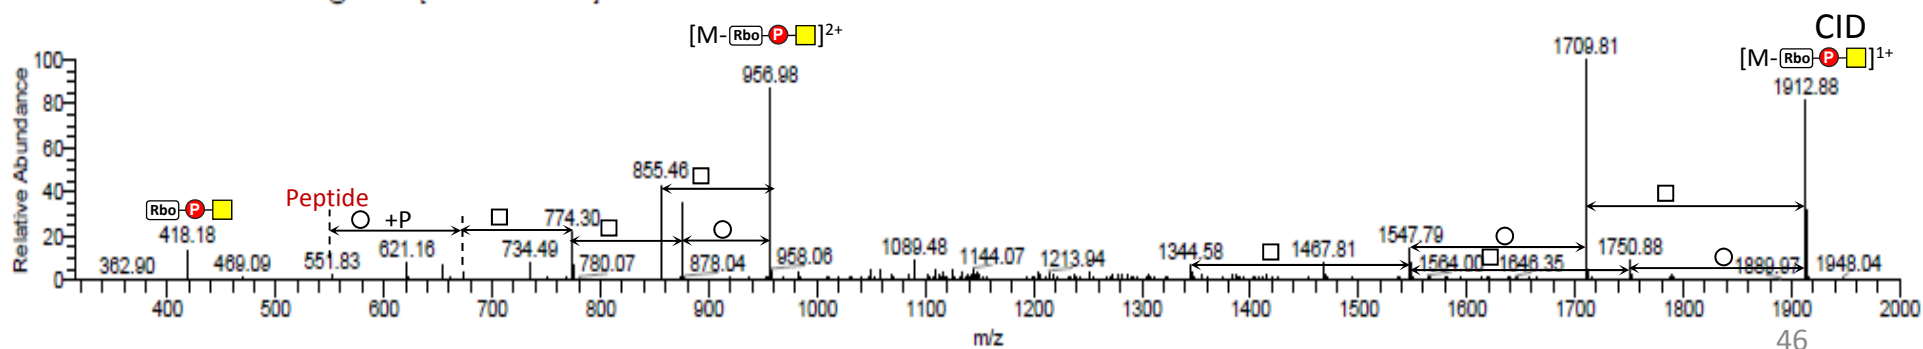

# HEK293-WT<sub>pyr</sub>QIHA<sup>T</sup>TPVR + Hex<sub>2</sub>HexNAC<sub>3</sub>P<sub>2</sub>RboP<sub>1</sub>

HEK293\_DG373Fc\_3 #10177-10309 RT: 40.94-41.29 AV: 23 NL: 3.51E8  
F: FTMS + p NSI Full ms

MS

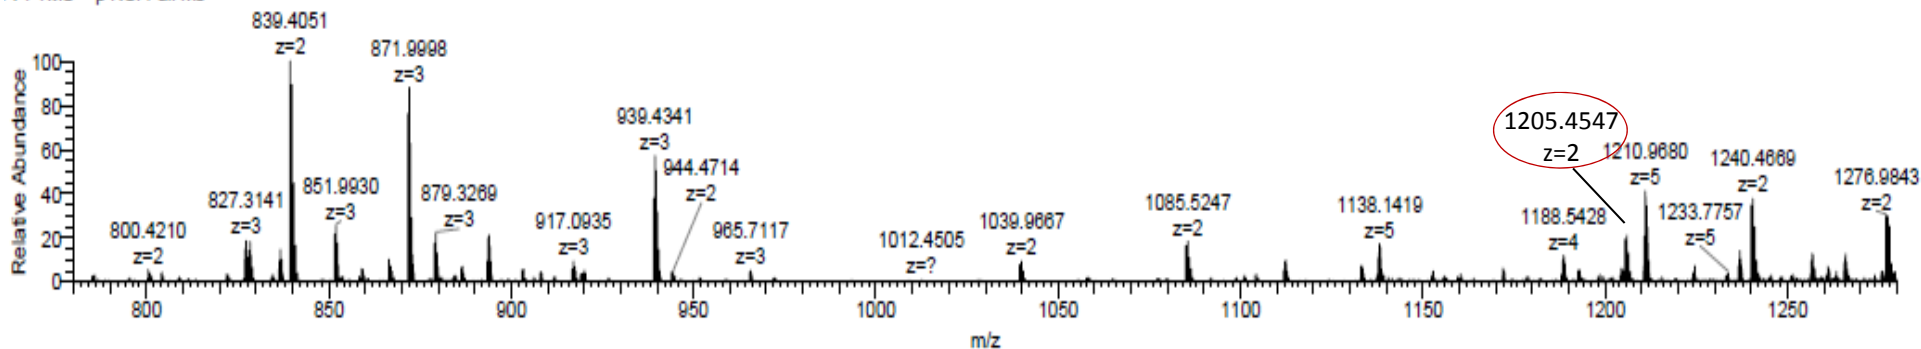

HEK293\_DG373Fc\_3 #10214 RT: 41.03 AV: 1 NL: 3.40E4  
T: FTMS + p NSI d Full ms2 1205.9583@hcd28.00 [120.0000-2000.0000]

MS<sup>2</sup>  
HCD

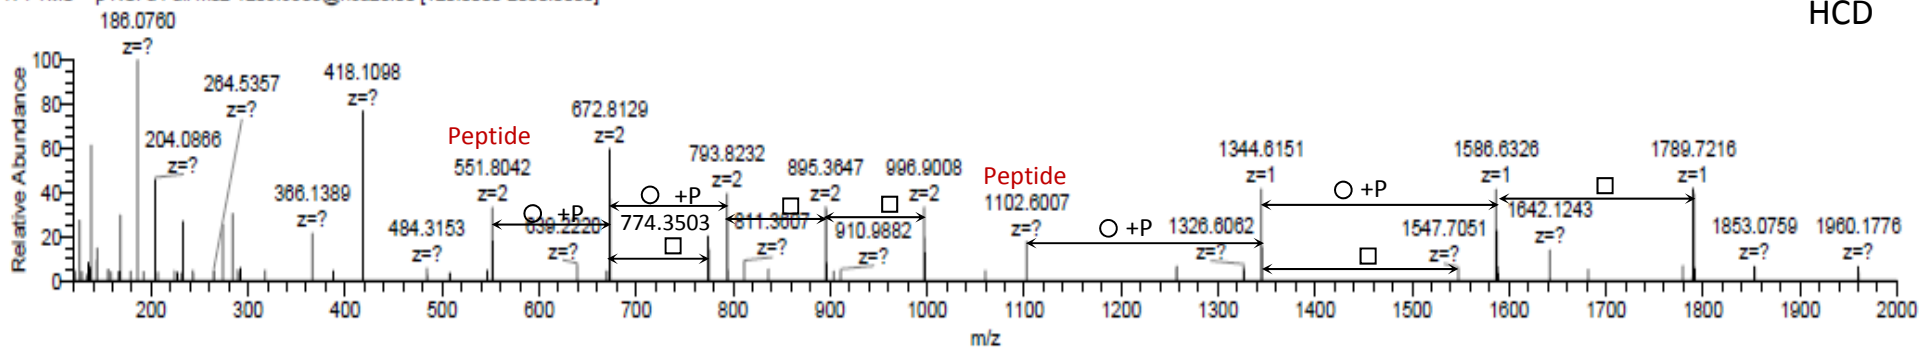

HEK293\_DG373Fc\_3 #10215 RT: 41.03 AV: 1 NL: 1.75E3  
T: ITMS + c NSI r d Full ms2 1205.9583@cid30.00 [327.0000-2000.0000]

MS<sup>2</sup>  
CID

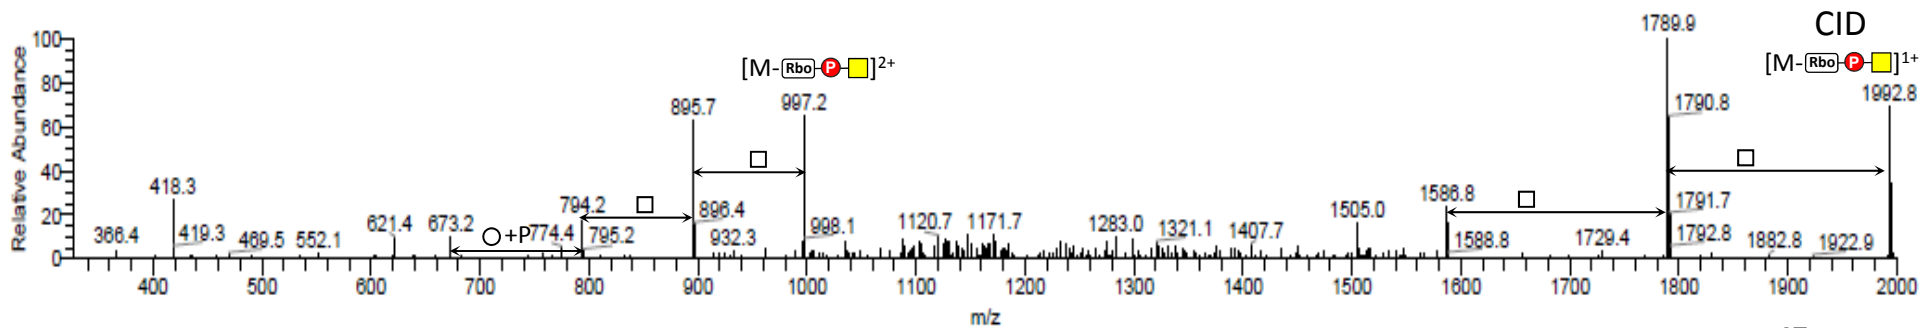

# HEK293-WT<sub>pyr</sub>QIHA<sup>T</sup>TPVR + Hex<sub>1</sub>HexNAC<sub>2</sub>P<sub>1</sub>RboP<sub>2</sub>Pent<sub>1</sub>HexA<sub>1</sub>

MS

HEK293\_DG373Fc\_3 #12819-12890 RT: 48.85-49.12 AV: 22 NL: 0.19E5  
F: FTMS + p NSI Full ms

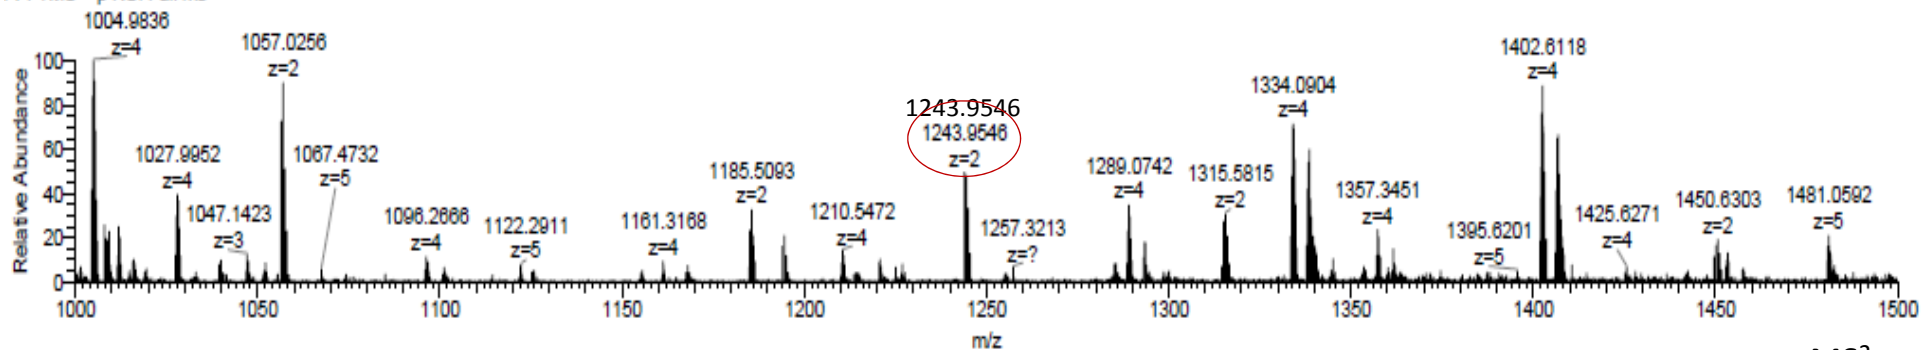

MS<sup>2</sup>  
HCD

HEK293\_DG373Fc\_3 #12858 RT: 48.98 AV: 1 NL: 2.75E4  
T: FTMS + p NSI d Full ms2 1244.4557@hod28.00 [120.0000-2000.0000]

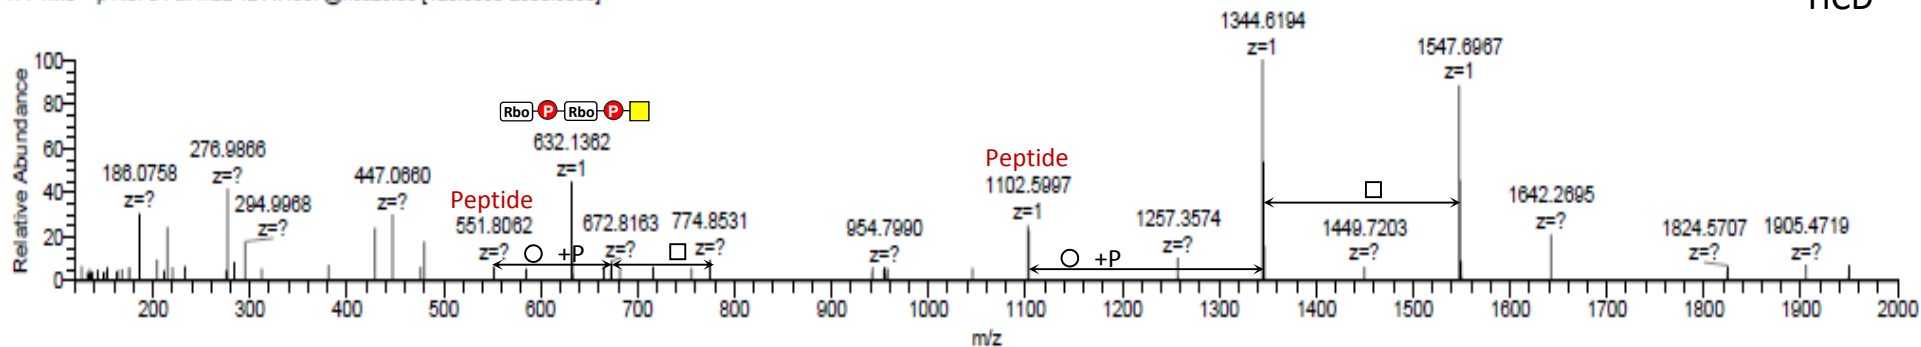

HEK293\_DG373Fc\_3 #12861 RT: 48.99 AV: 1 NL: 1.99E3  
T: ITMS + c NSI r d Full ms2 1244.4557@cid30.00 [337.0000-2000.0000]

MS<sup>2</sup>  
CID

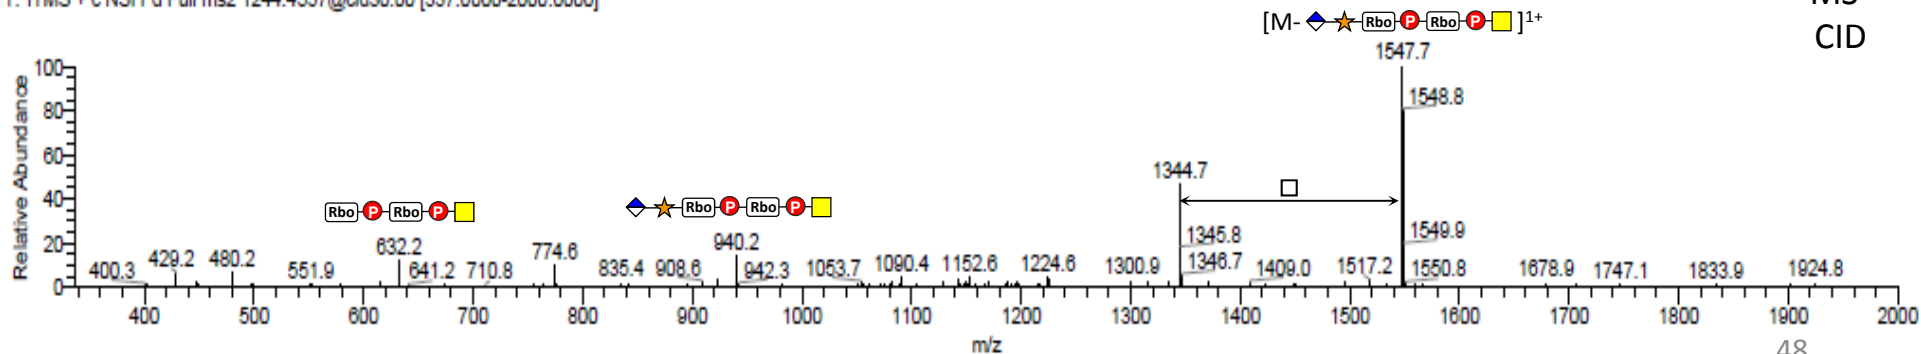



# HCT116- $\Delta$ FKRP<sub>pyr</sub>QIHA $\overline{\text{TP}}$ PVR + Hex<sub>3</sub>HexNAc<sub>3</sub>P<sub>1</sub>RboP<sub>1</sub>

MS

2-1\_FKRP\_aDG373Fc\_T322R #10783-11005 RT: 32.71-33.05 AV: 8 NL: 2.15E7  
 F: FTMS + p NSI Full ms [550.0000-1950.0000]

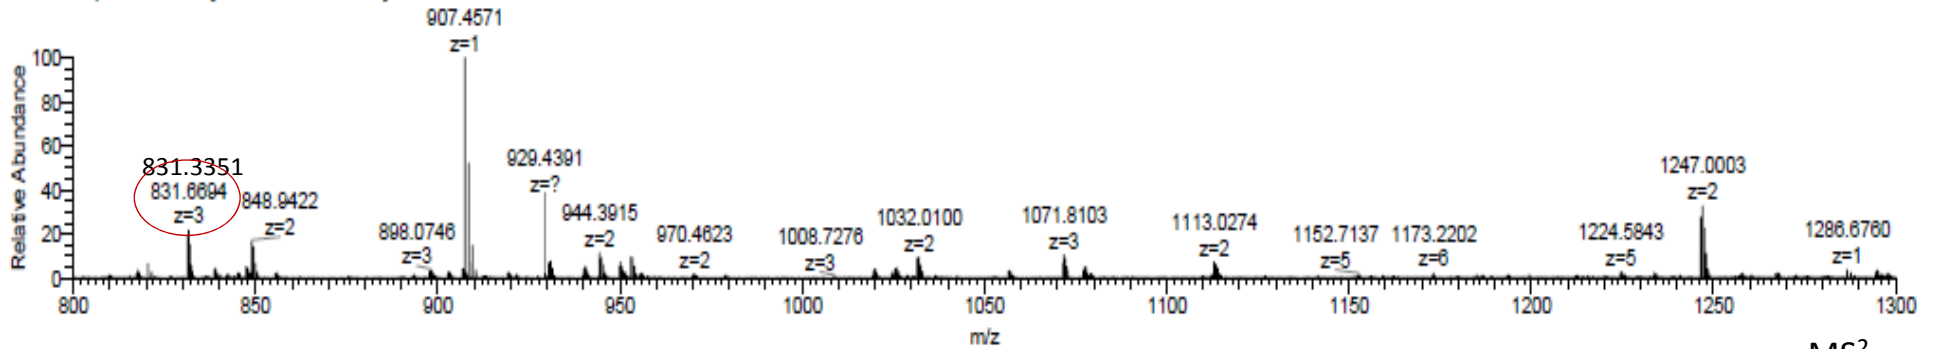

2-1\_FKRP\_aDG373Fc\_T322R #10848 RT: 32.80 AV: 1 NL: 3.42E5  
 T: FTMS + p NSI d Full ms2 831.8895@hd28.00 [120.0000-2000.0000]

MS<sup>2</sup>  
 HCD

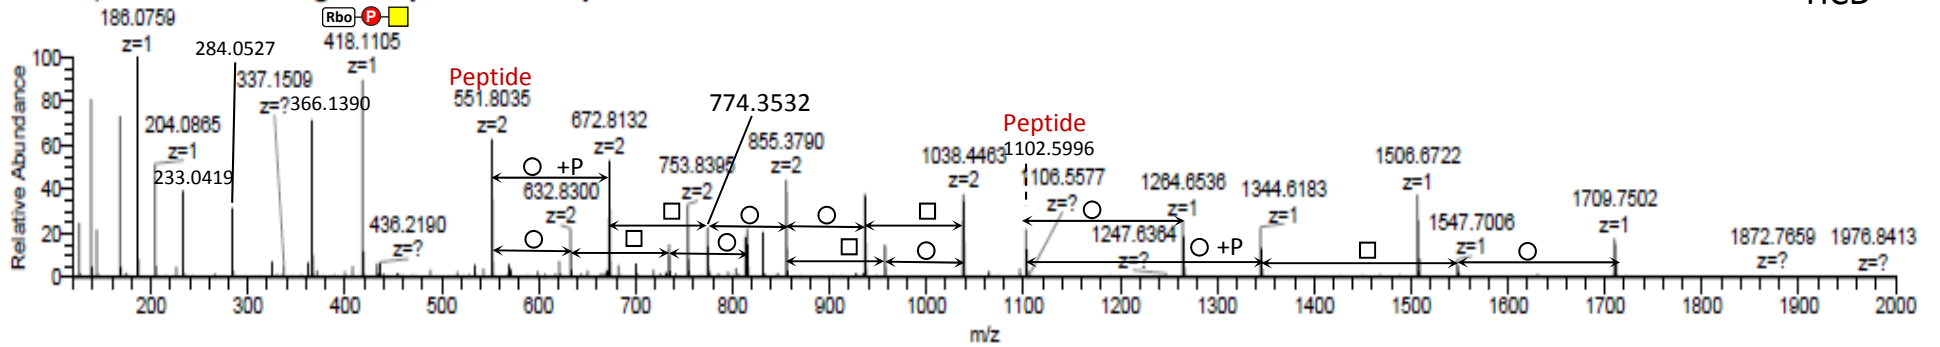

2-1\_FKRP\_aDG373Fc\_T322R #10850 RT: 32.81 AV: 1 NL: 1.58E5  
 T: ITMS + c NSI r d Full ms2 831.8895@cid30.00 [223.0000-2000.0000]

MS<sup>2</sup>  
 CID

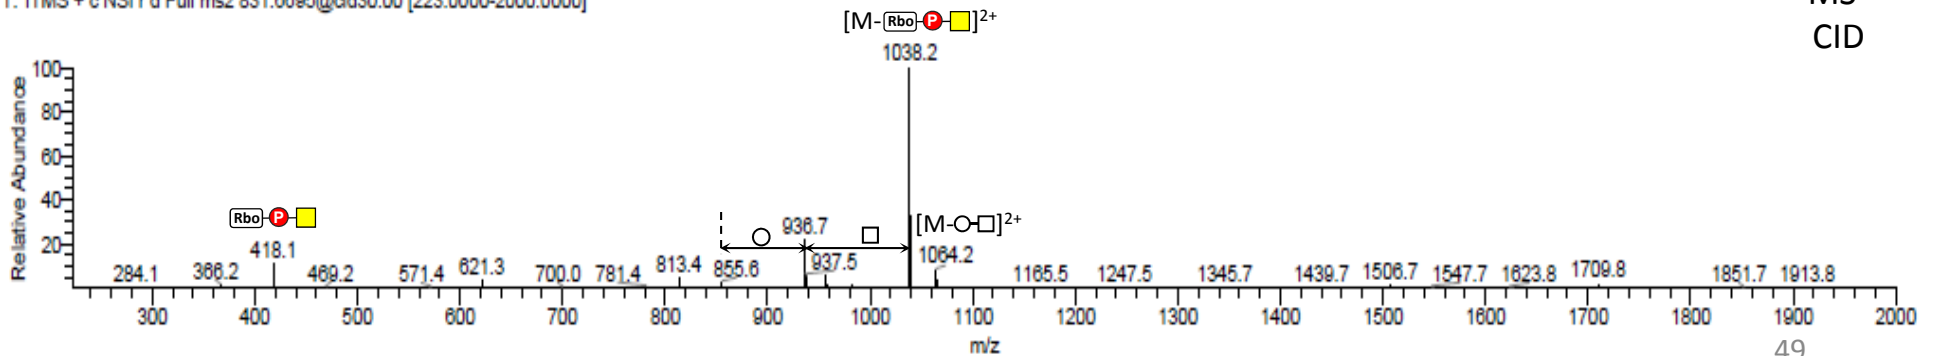

# HCT116- $\Delta$ FKRP<sub>pyr</sub>QIHA**T**TPVR + Hex<sub>2</sub>HexNAC<sub>3</sub>NeuAc<sub>1</sub>P<sub>1</sub>RboP<sub>1</sub>

2-1\_FKRP\_aDG373Fc\_T322R #13994-14064 RT: 37.91-38.02 AV: 3 NL: 2.20E8  
F: FTMS + p NSI Full ms [550.0000-1950.0000]

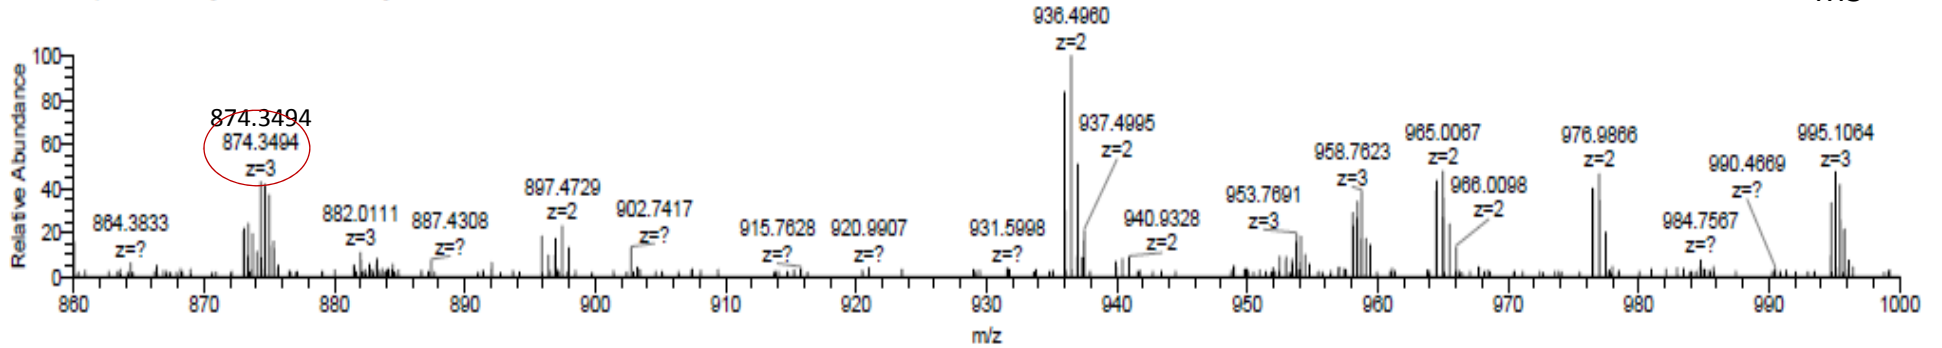

MS

2-1\_FKRP\_aDG373Fc\_T322R #14011 RT: 37.93 AV: 1 NL: 1.28E5  
T: FTMS + p NSI d Full ms2 874.3494@hcd28.00 [120.0000-2000.0000]

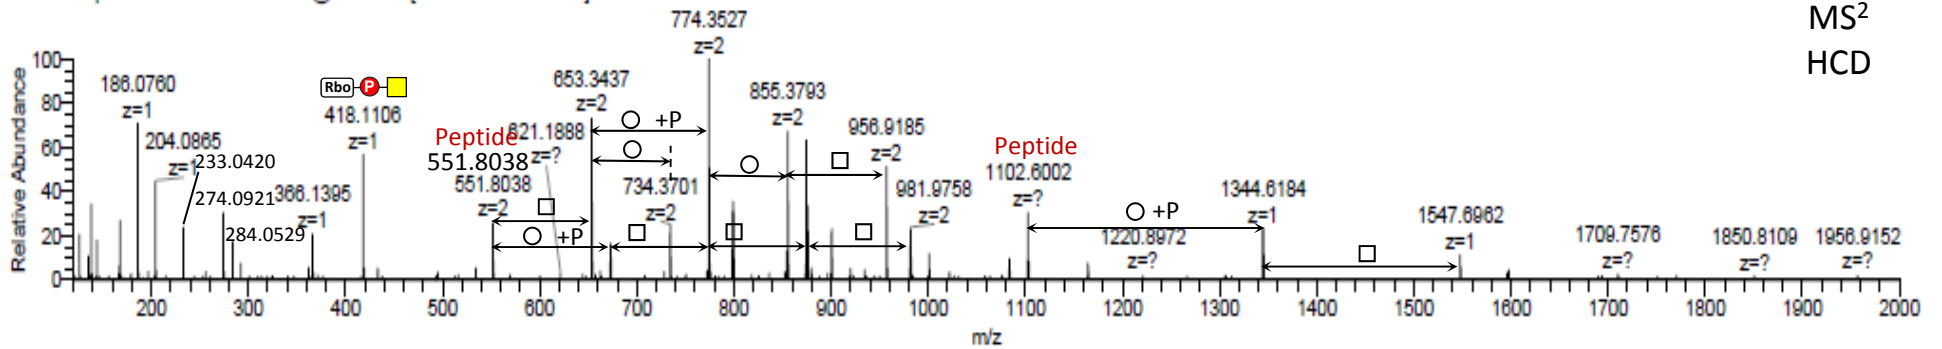

MS<sup>2</sup>  
HCD

2-1\_FKRP\_aDG373Fc\_T322R #14059 RT: 38.01 AV: 1 NL: 2.37E4  
T: ITMS + c NSI r d Full ms2 874.3491@cid30.00 [235.0000-2000.0000]

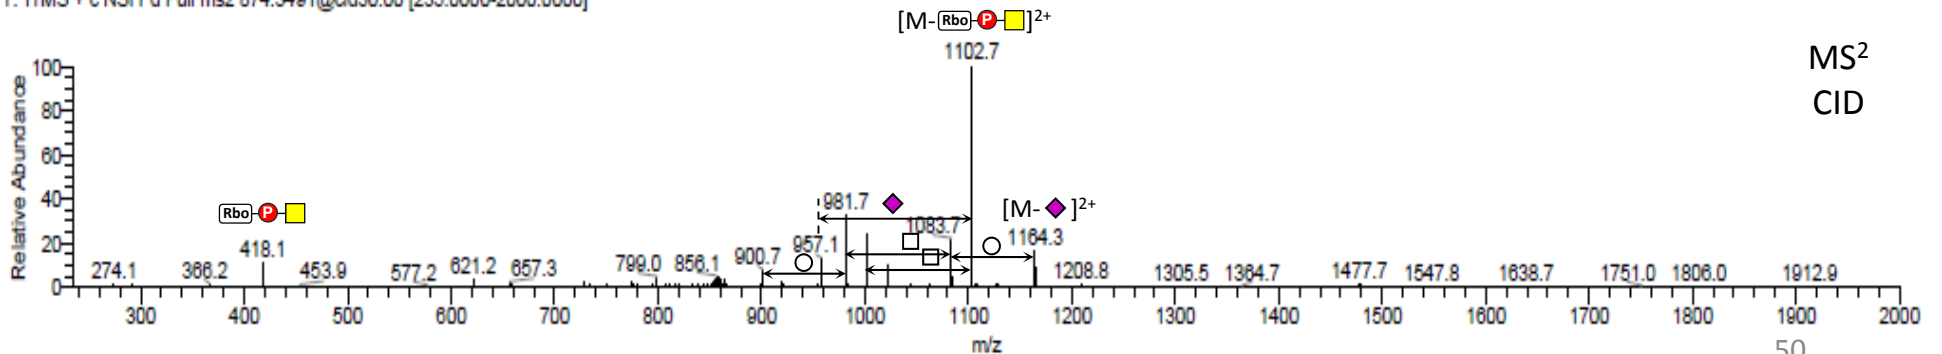

MS<sup>2</sup>  
CID

# HEK293-WT<sub>pyr</sub>QIHA**TP**TPVR + Hex<sub>3</sub>HexNAC<sub>3</sub>NeuAc<sub>1</sub>P<sub>1</sub>RboP<sub>1</sub>

HEK293\_DG373Fc\_3 #9762-9853 RT: 39.93-40.18 AV: 16 NL: 2.42E8  
F: FTMS + p NSI Full ms

MS

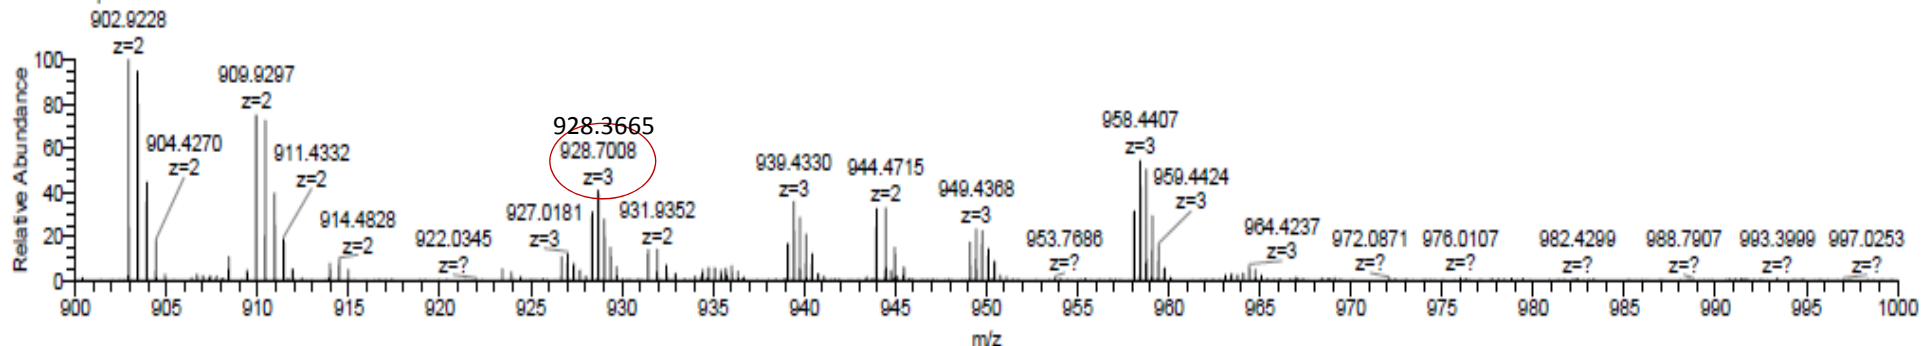

HEK293\_DG373Fc\_3 #9804 RT: 40.08 AV: 1 NL: 5.89E4  
T: FTMS + p NSI d Full ms2 928.3663@hcd28.00 [120.0000-2000.0000]

MS<sup>2</sup>  
HCD

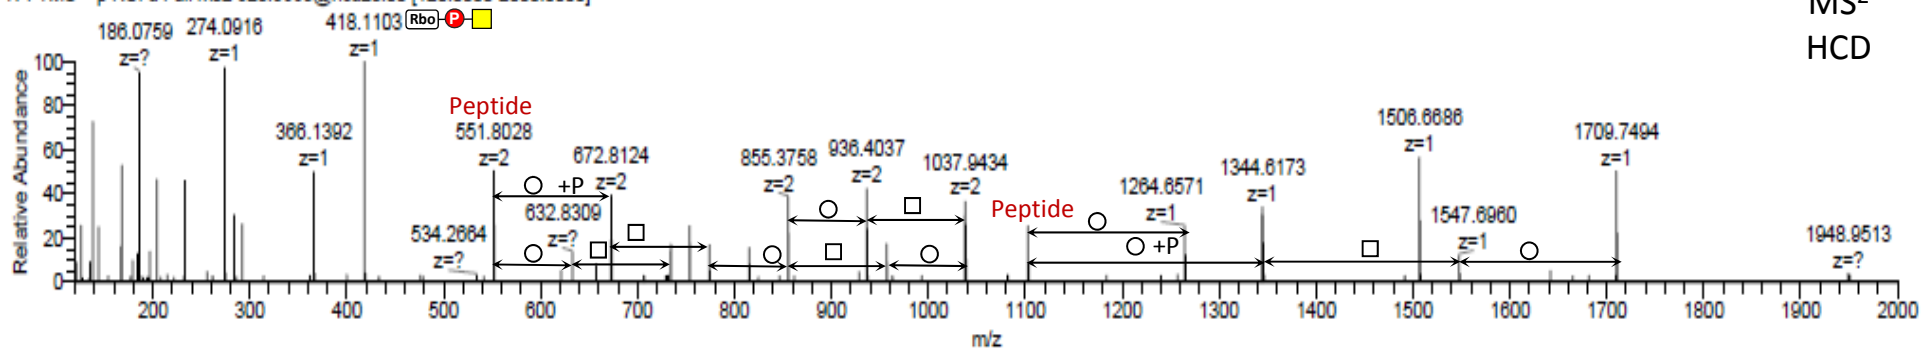

HEK293\_DG373Fc\_3 #9807 RT: 40.08 AV: 1 NL: 1.45E4  
T: ITMS + c NSI r d Full ms2 928.3663@cid30.00 [250.0000-2000.0000]

MS<sup>2</sup>  
CID

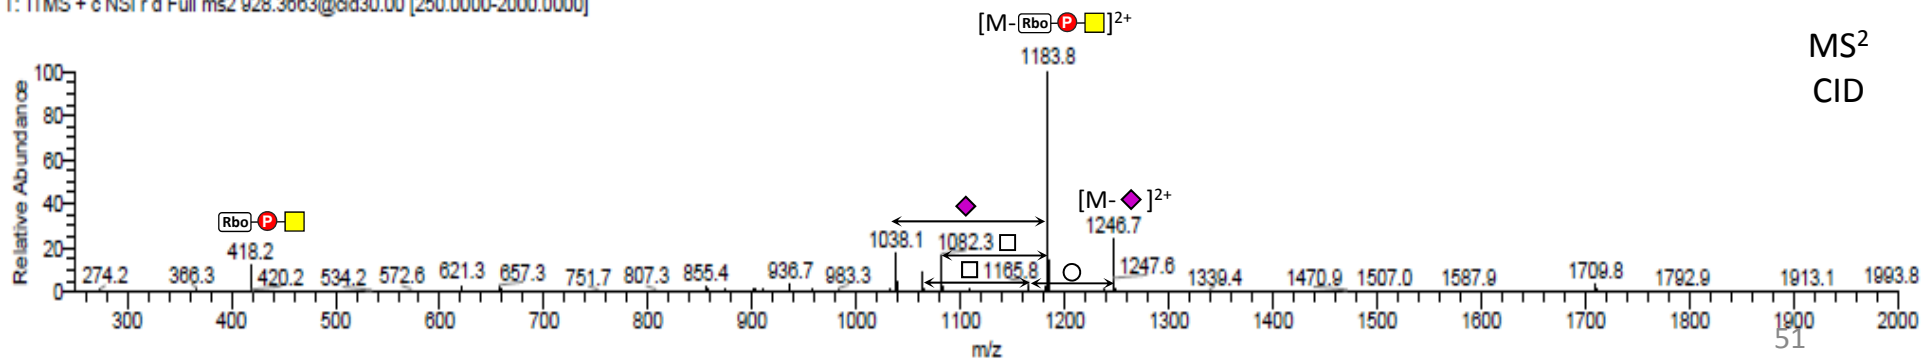

# HEK293-WT<sub>pyr</sub>QIHA**T**PT**P**V**R** + Hex<sub>3</sub>HexNAc<sub>3</sub>P<sub>1</sub>RboP<sub>2</sub>Pent<sub>1</sub>HexA<sub>1</sub>

HEK293\_DG373Fc\_3 #10806-10961 RT: 42.65-42.97 AV: 11 NL: 2.95E6  
F: FTMS + p NSI Full ms

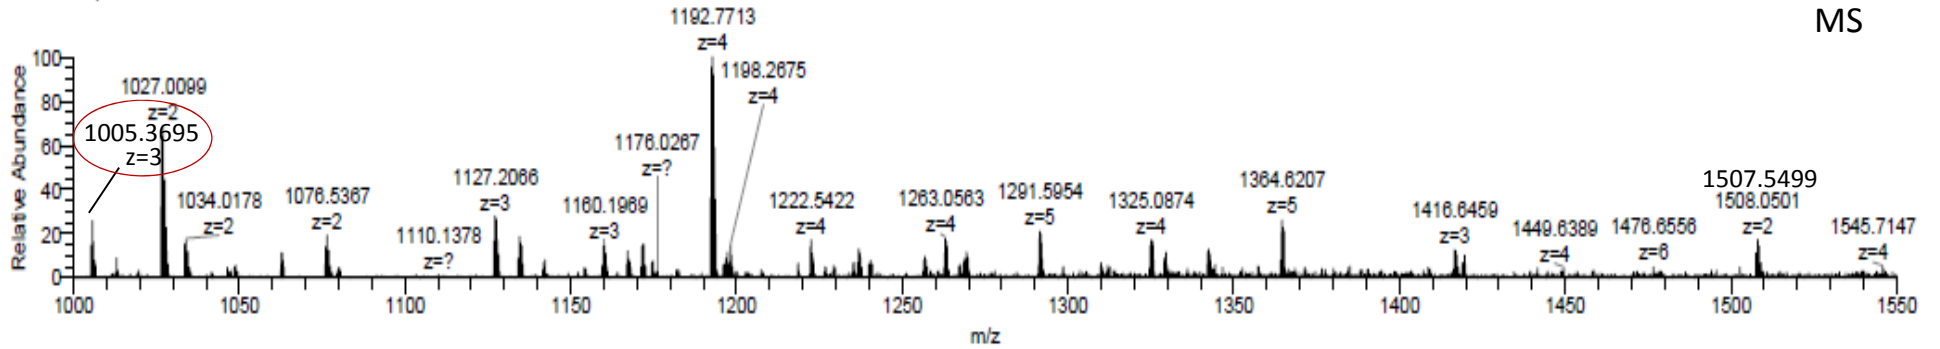

HEK293\_DG373Fc\_3 #10879 RT: 42.81 AV: 1 NL: 2.61E4  
T: FTMS + p NSI d Full ms2 1005.7015@hcd28.00 [120.0000-Rbo-P-Rbo-P-]

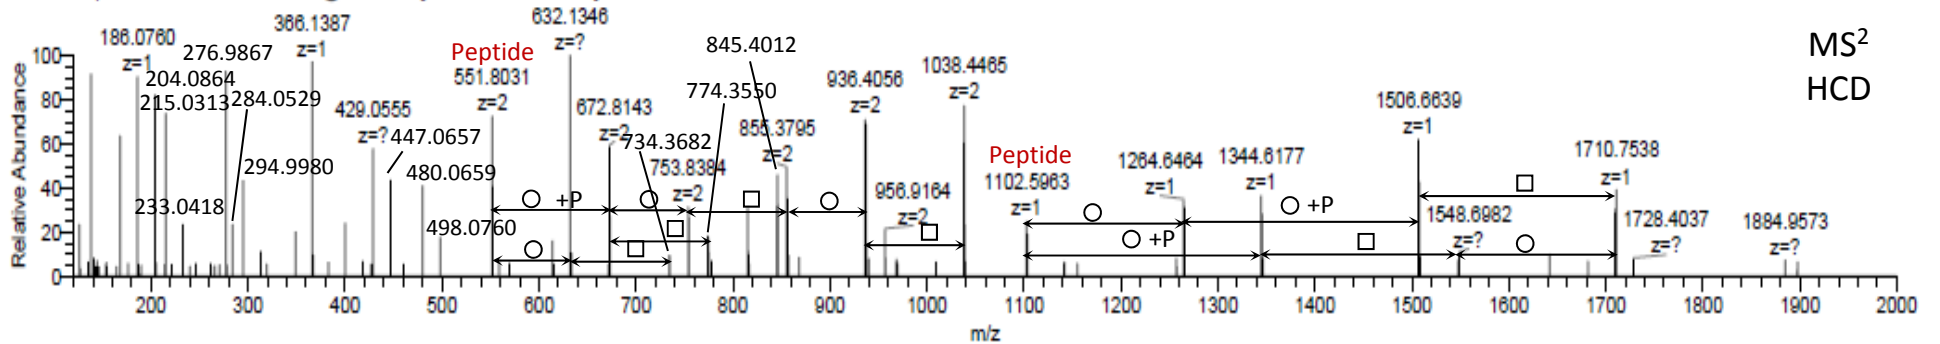

HEK293\_DG373Fc\_3 #10882 RT: 42.81 AV: 1 NL: 1.12E4  
T: ITMS + c NSI r d Full ms2 1005.7015@cid30.00 [271.0000-2001.0000]

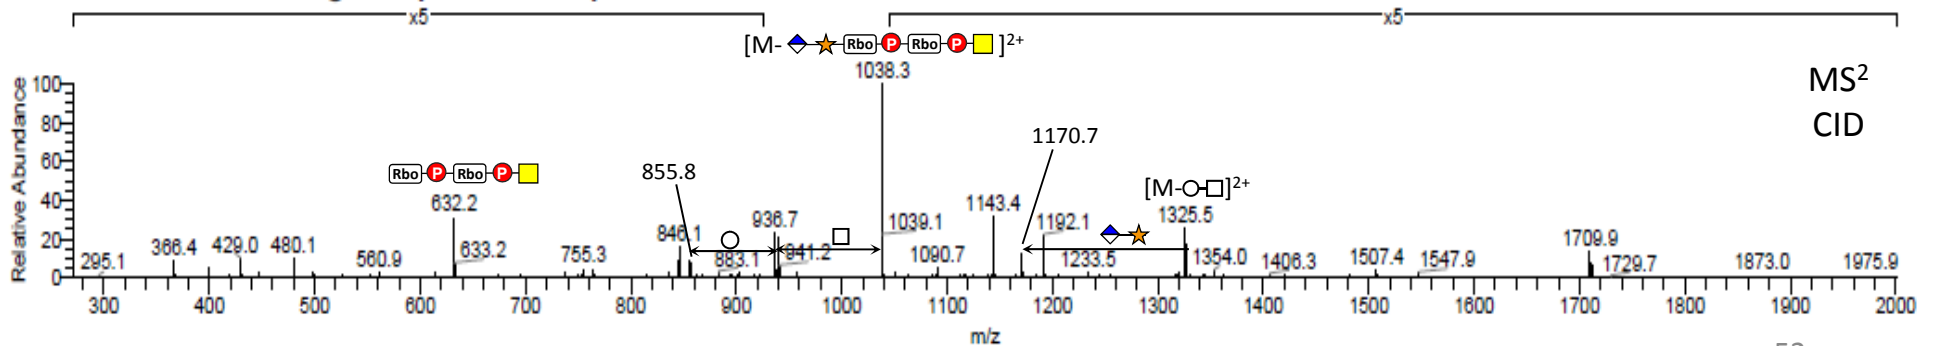

# HEK293-WT<sub>pyr</sub>QIHA**T**PT**P**V**R** + Hex<sub>3</sub>HexNAc<sub>3</sub>NeuAc<sub>1</sub>P<sub>1</sub>RboP<sub>2</sub>Pent<sub>1</sub>HexA<sub>1</sub>

HEK293\_DG373Fc\_3 #14864-15002 RT: 55.01-55.52 AV: 44 NL: 5.16E6  
 F: FTMS + p NSI Full ms

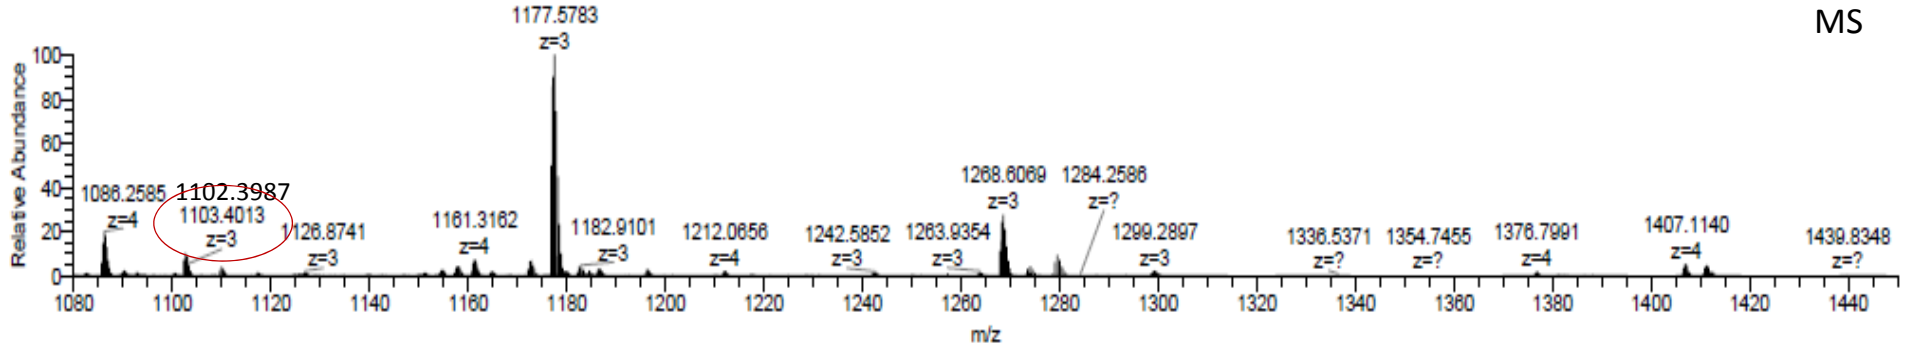

HEK293\_DG373Fc\_3 #14937 RT: 55.24 AV: 1 NL: 1.19E4  
 T: FTMS + p NSI d Full ms2 1102.7335@hcd28.00 [120.0000-2000.0000]

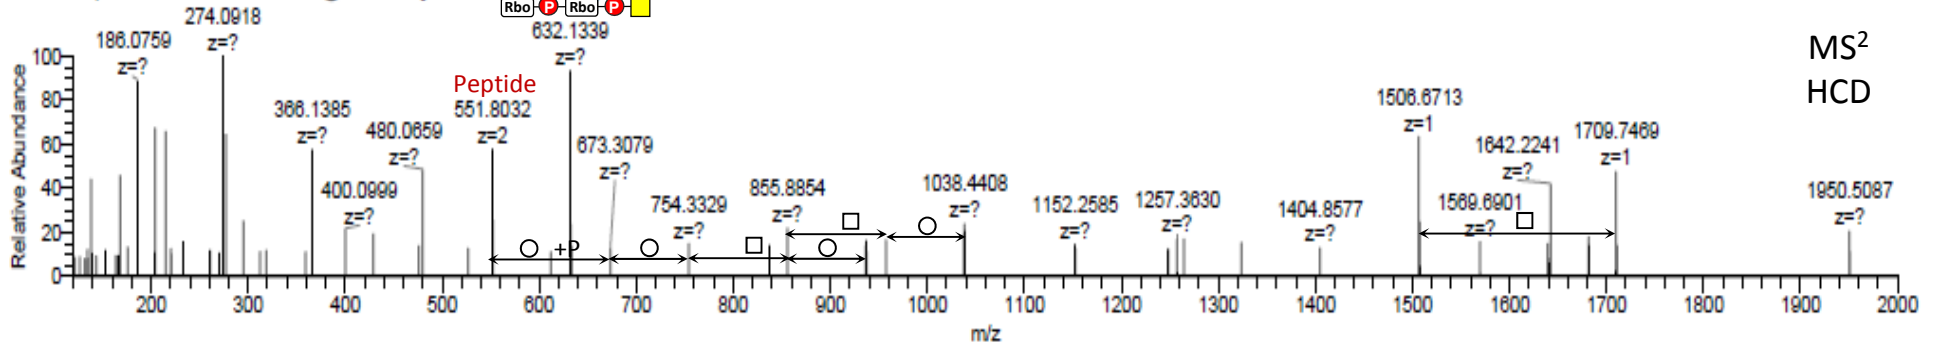

HEK293\_DG373Fc\_3 #14940 RT: 55.25 AV: 1 NL: 1.59E3  
 T: ITMS + c NSI r d Full ms2 1102.7335@cid30.00 [298.0000-2000.0000]

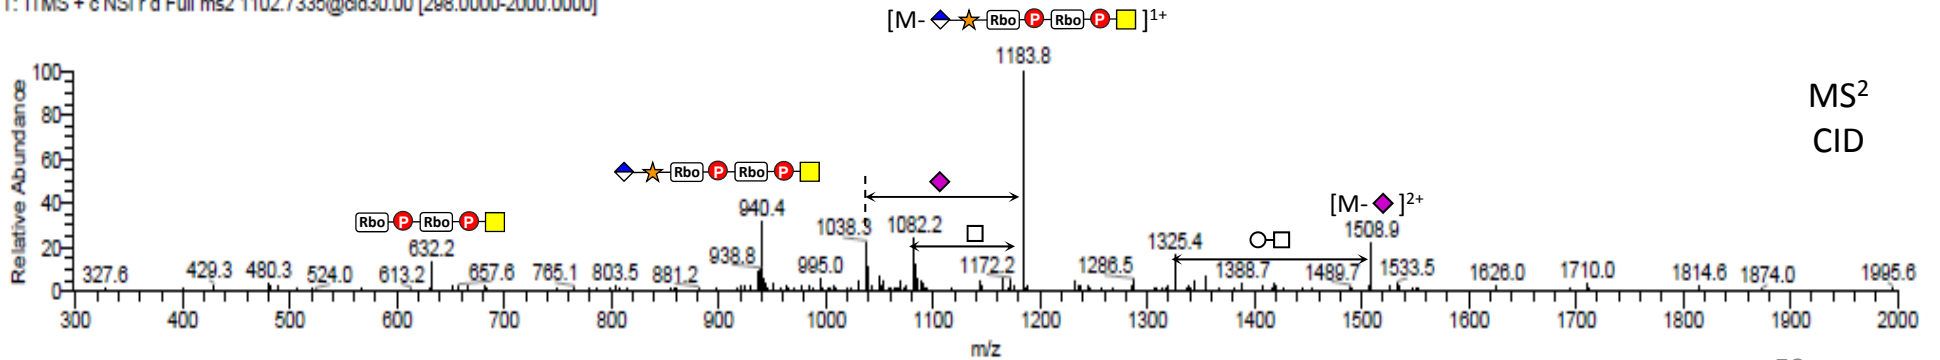

# HCT116- $\Delta$ ISPD<sub>pyr</sub>QIHA $\overline{\text{TP}}$ PVR + Hex<sub>1</sub>HexNAc<sub>2</sub>P<sub>1</sub>GroP<sub>1</sub>

1-1\_ISPD\_aDG373Fc\_T322R #15572-15611 RT: 36.88-36.93 AV: 2 NL: 2.58E7  
 F: FTMS + p NSI Full ms

MS

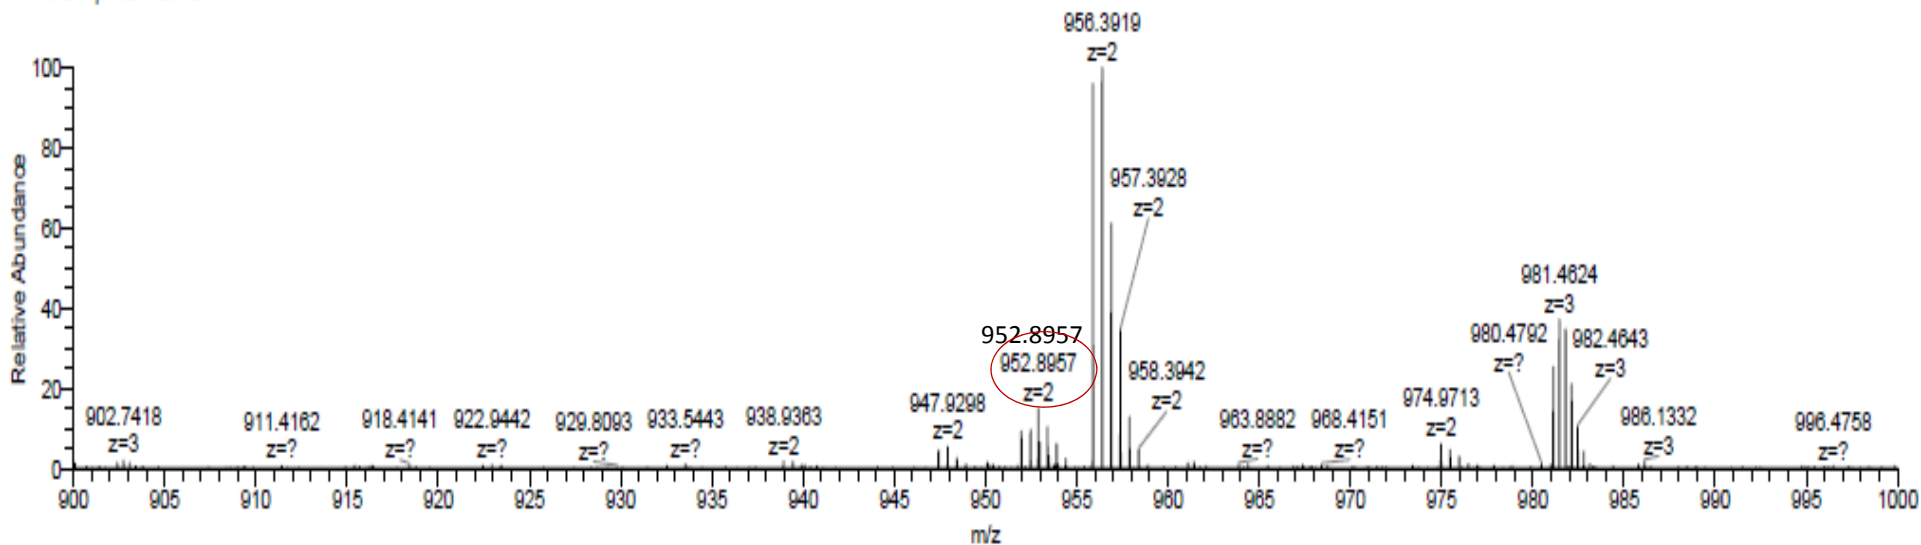

1-1\_ISPD\_aDG373Fc\_T322R #15609 RT: 36.94 AV: 1 NL: 8.28E5  
 T: FTMS + p NSI d Full ms2 952.8959@hcd28.00 [120.0000-1916.0000]

MS<sup>2</sup>  
 HCD

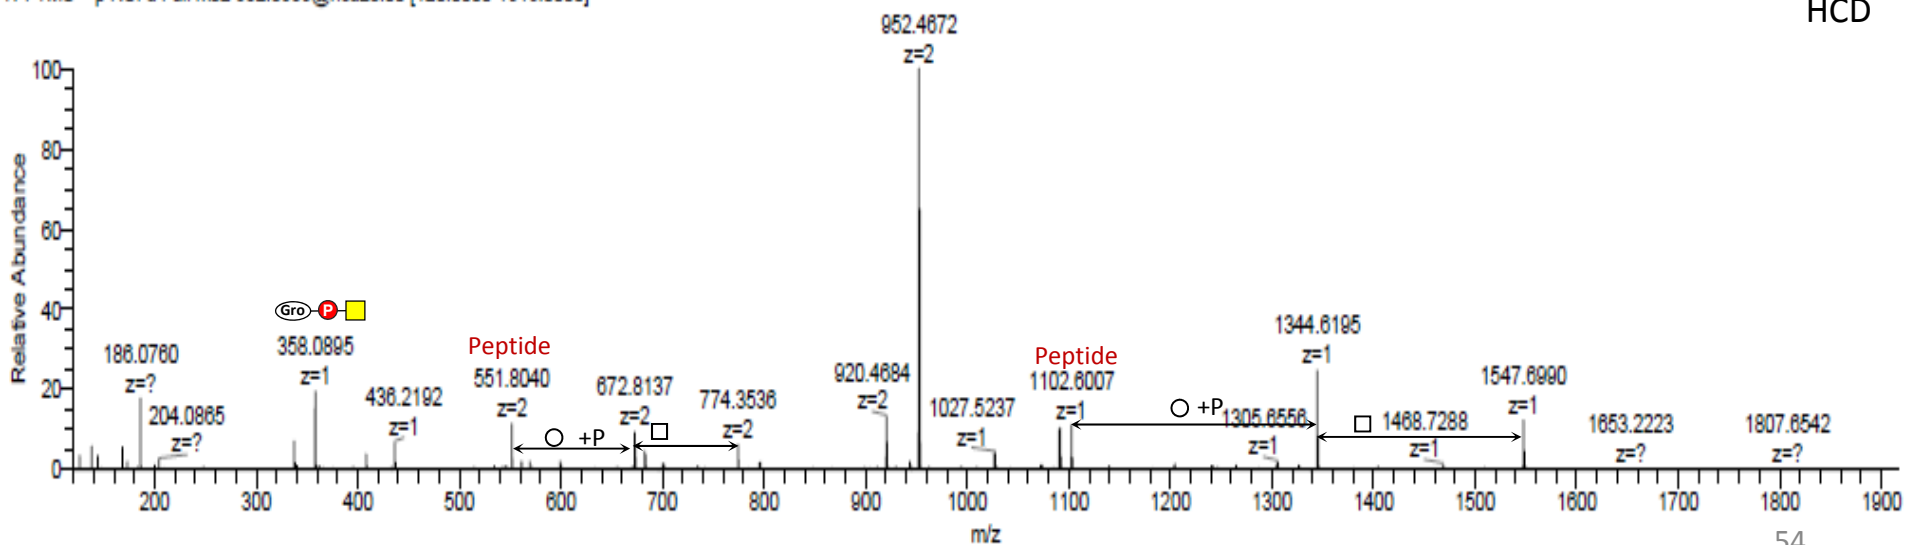

# HCT116- $\Delta$ ISPD<sub>pyr</sub>QIHATPTPVR + Hex<sub>2</sub>HexNAc<sub>2</sub>P<sub>1</sub>GroP<sub>1</sub>

1-1\_ISPD\_aDG373Fc\_T322R #13920-14050 RT: 34.14-34.34 AV: 5 NL: 1.17E8  
 F: FTMS + p NSI Full ms

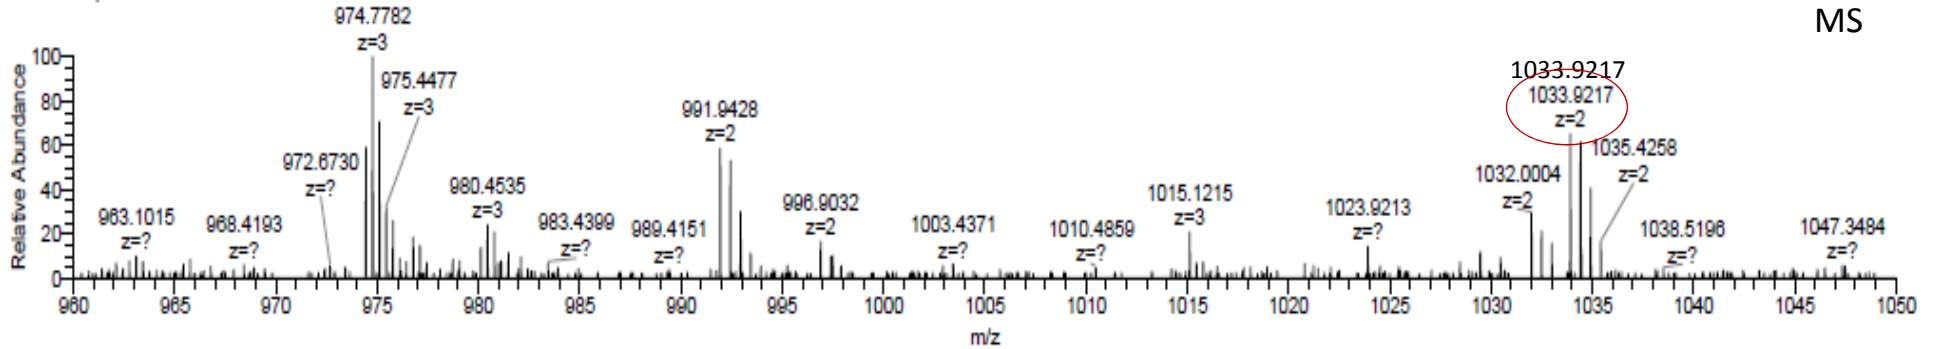

1-1\_ISPD\_aDG373Fc\_T322R #13998 RT: 34.26 AV: 1 NL: 5.48E4  
 T: FTMS + p NSI d Full ms2 1033.9222@hcd28.00 [120.0000-2000.0000]

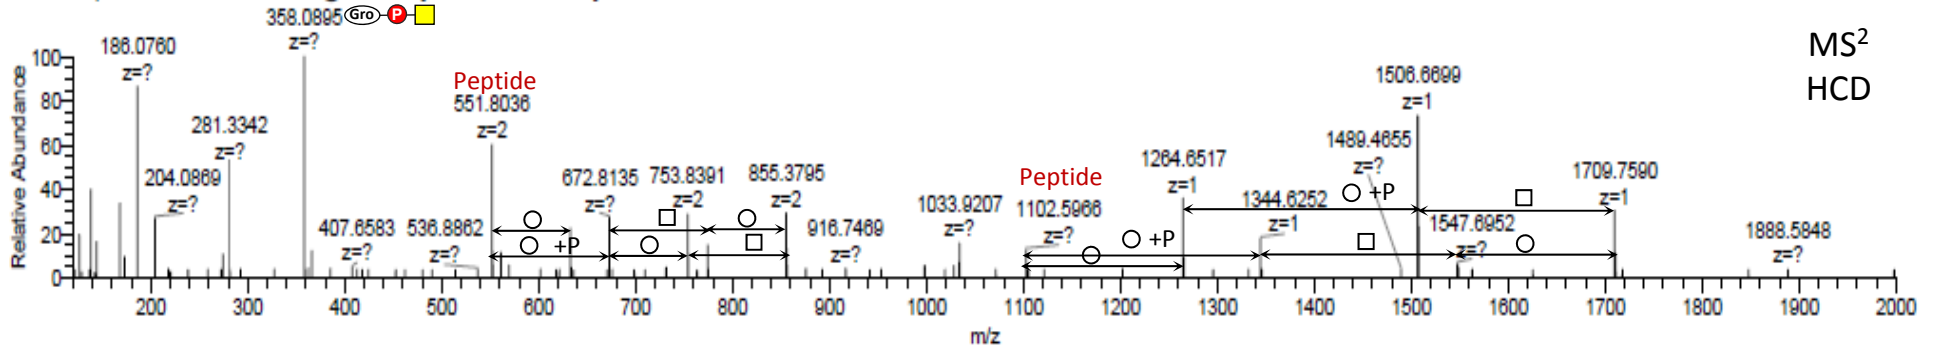

1-1\_ISPD\_aDG373Fc\_T322R #14001 RT: 34.26 AV: 1 NL: 2.86E3  
 T: FTMS + c NSI rd Full ms2 1033.9222@cid30.00 [279.0000-2000.0000]

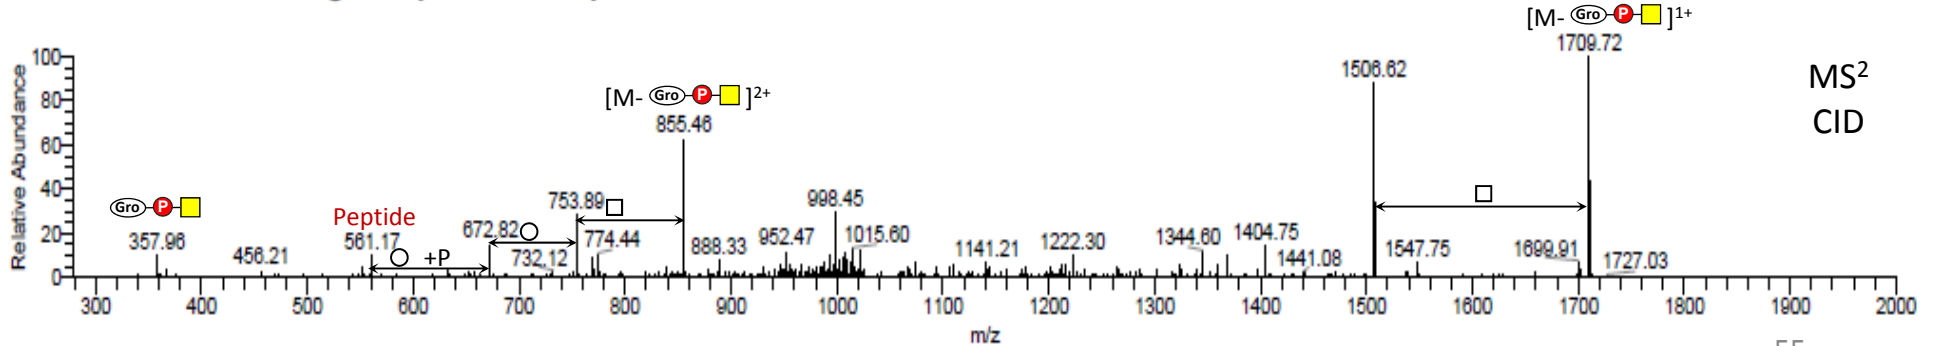

# HCT116- $\Delta$ ISPD<sub>pyr</sub>QIHATPTPVR + Hex<sub>2</sub>HexNAC<sub>3</sub>P<sub>1</sub>GroP<sub>1</sub>

1-1\_ISPD\_aDG373Fc\_T322R #12745-12977 RT: 32.20-32.56 AV: 8 NL: 4.34E8  
 F: FTMS + p NSI Full ms

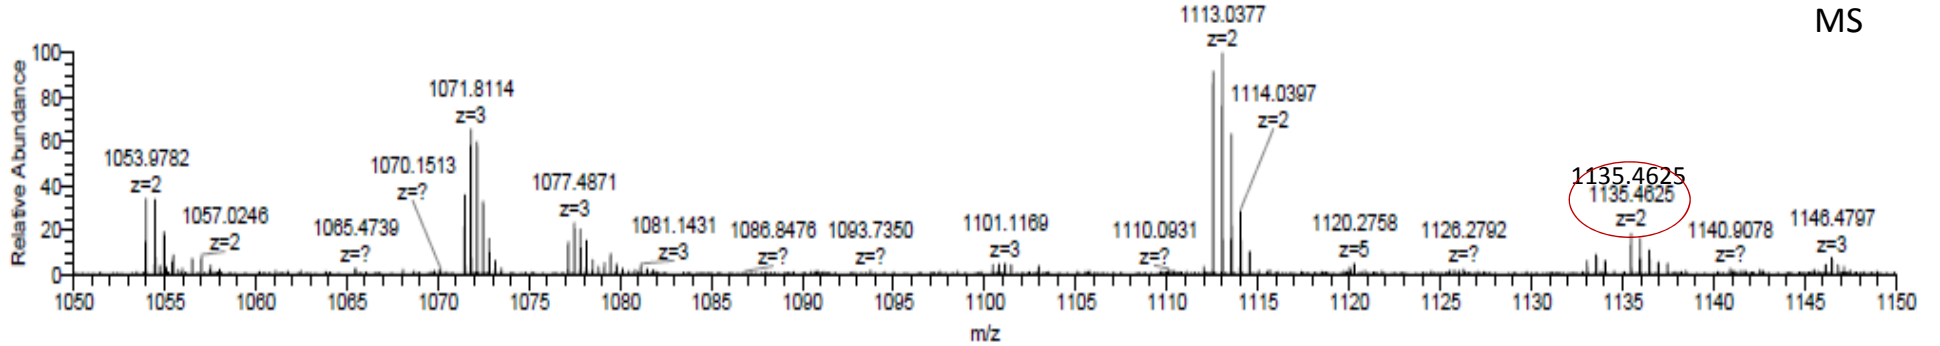

1-1\_ISPD\_aDG373Fc\_T322R #12834 RT: 32.33 AV: 1 NL: 4.27E4  
 T: FTMS + p NSI d Full ms2 1135.4612@hod28.00 [120.0000-2000.0000]

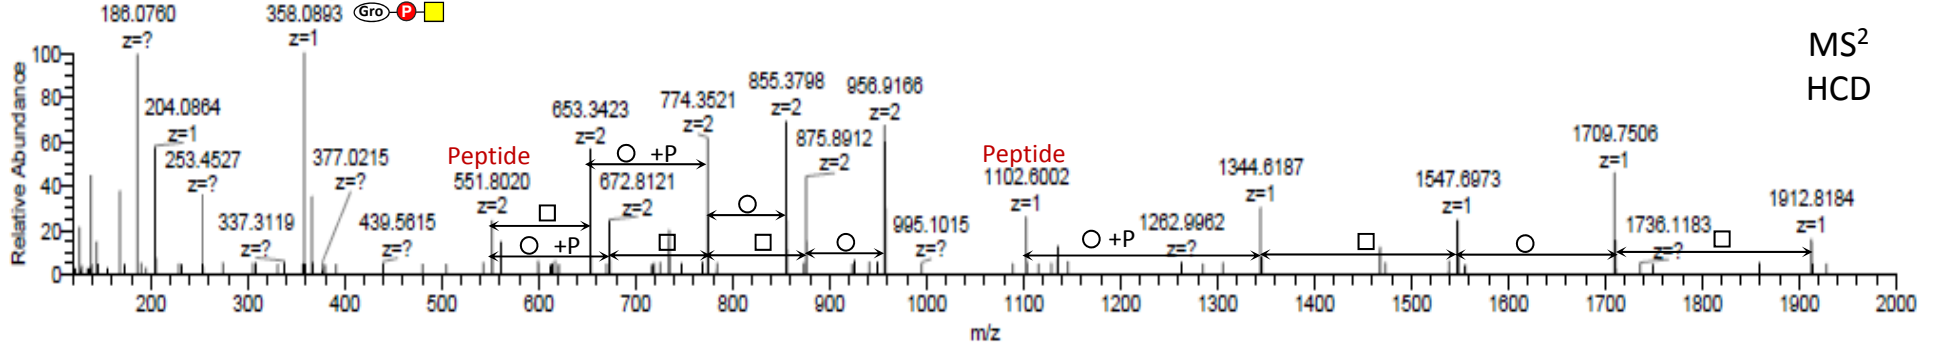

1-1\_ISPD\_aDG373Fc\_T322R #12837 RT: 32.33 AV: 1 NL: 3.71E3  
 T: FTMS + c NSI rd Full ms2 1135.4612@cid30.00 [307.0000-2000.0000]

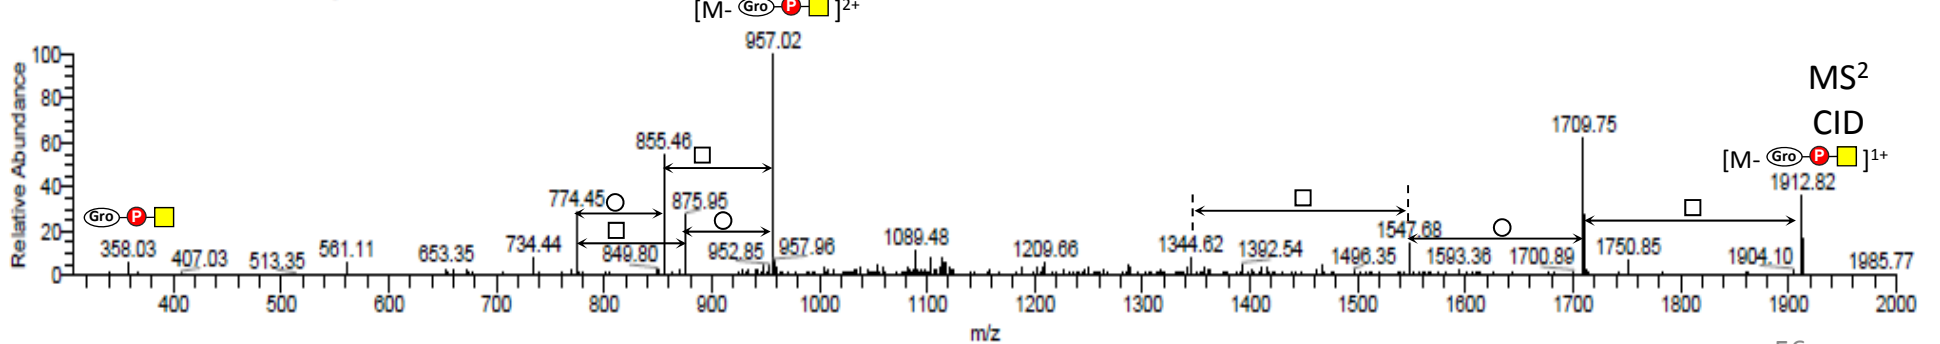



# HCT116- $\Delta$ ISPD<sub>pyr</sub>QIHATPTPVR + Hex<sub>3</sub>HexNAc<sub>3</sub>P<sub>1</sub>GroP<sub>1</sub>

1-1\_ISPD\_aDG373Fc\_T322R #13409-13805 RT: 33.27-33.58 AV: 7 NL: 9.64E8  
 F: FTMS + p NSI Full ms [550.0000-1950.0000]

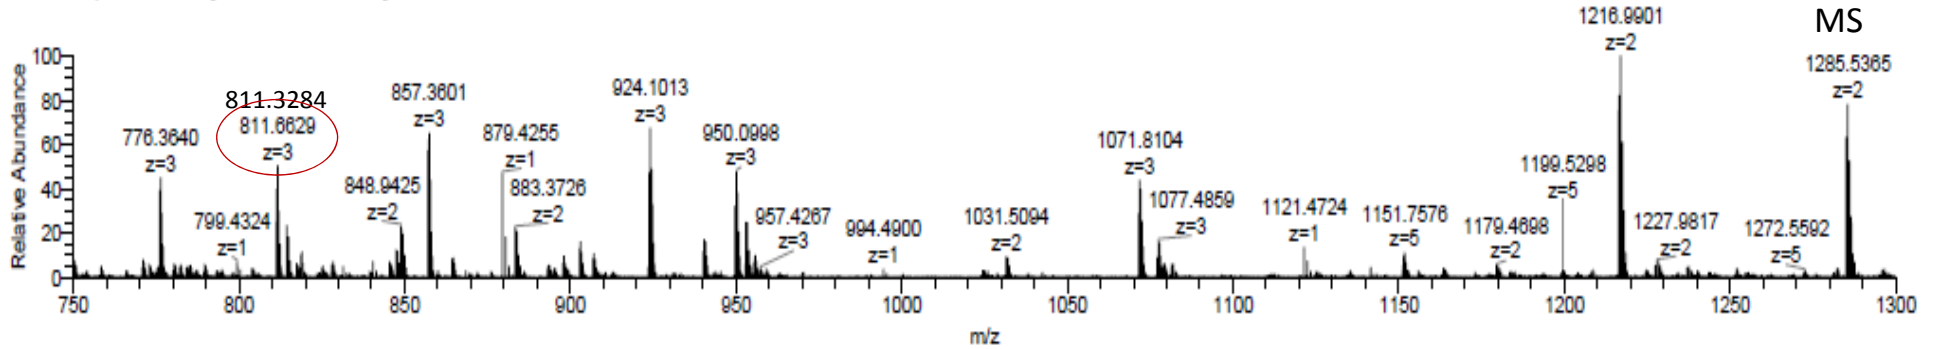

1-1\_ISPD\_aDG373Fc\_T322R #13475 RT: 33.38 AV: 1 NL: 6.00E5  
 T: FTMS + p NSI d Full ms2 811.8627@hd28.00 [120.0000-2000.0000]

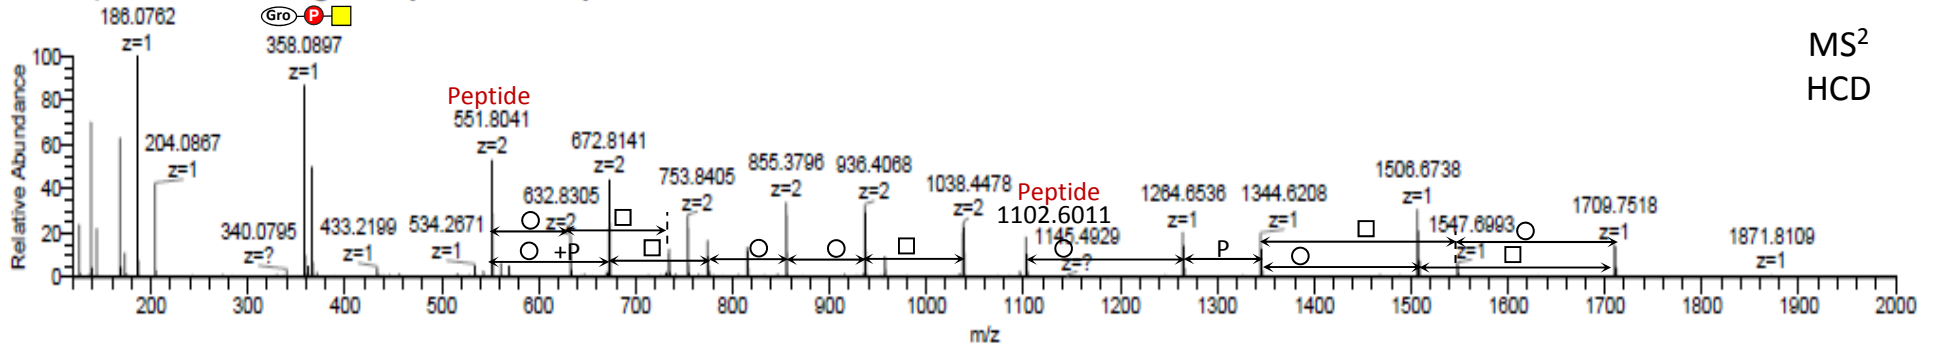

1-1\_ISPD\_aDG373Fc\_T322R #13478 RT: 33.39 AV: 1 NL: 1.89E5  
 T: ITMS + c NSI r d Full ms2 811.8627@cid30.00 [218.0000-2000.0000]

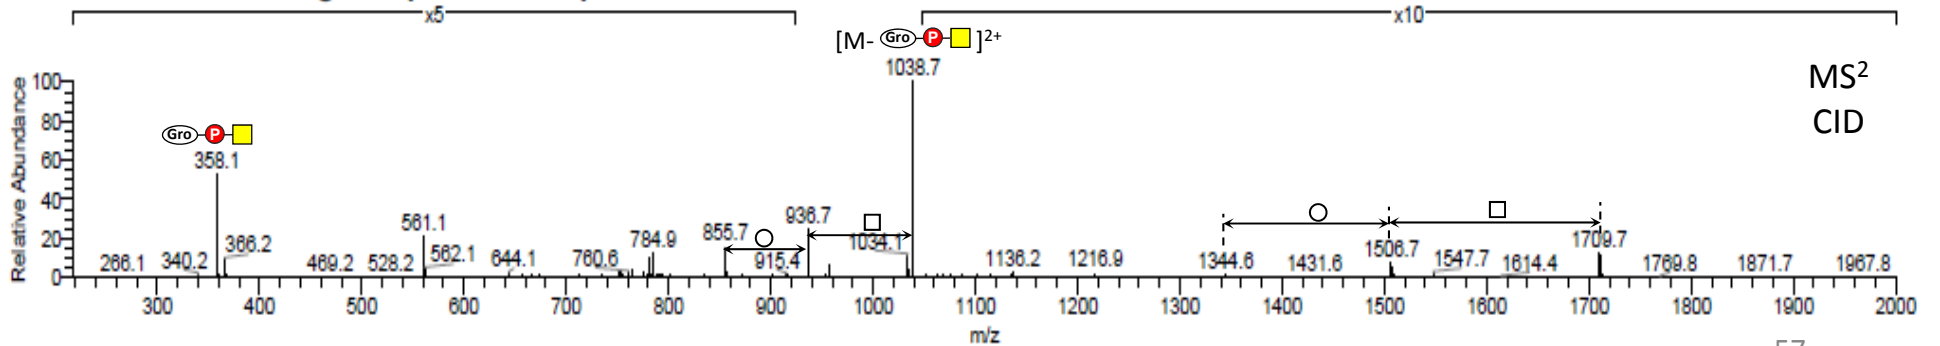

# HCT116- $\Delta$ ISPD<sub>pyr</sub>QIHATPTPVR + Hex<sub>3</sub>HexNAc<sub>3</sub>NeuAc<sub>1</sub>P<sub>1</sub>GroP<sub>1</sub>

I-1\_ISPD\_aDG373Fc\_T322R#17877-17953 RT: 40.44-40.90 AV: 10 NL: 7.85E6  
 F: FTMS + p NSI Full ms [550.0000-1950.0000]

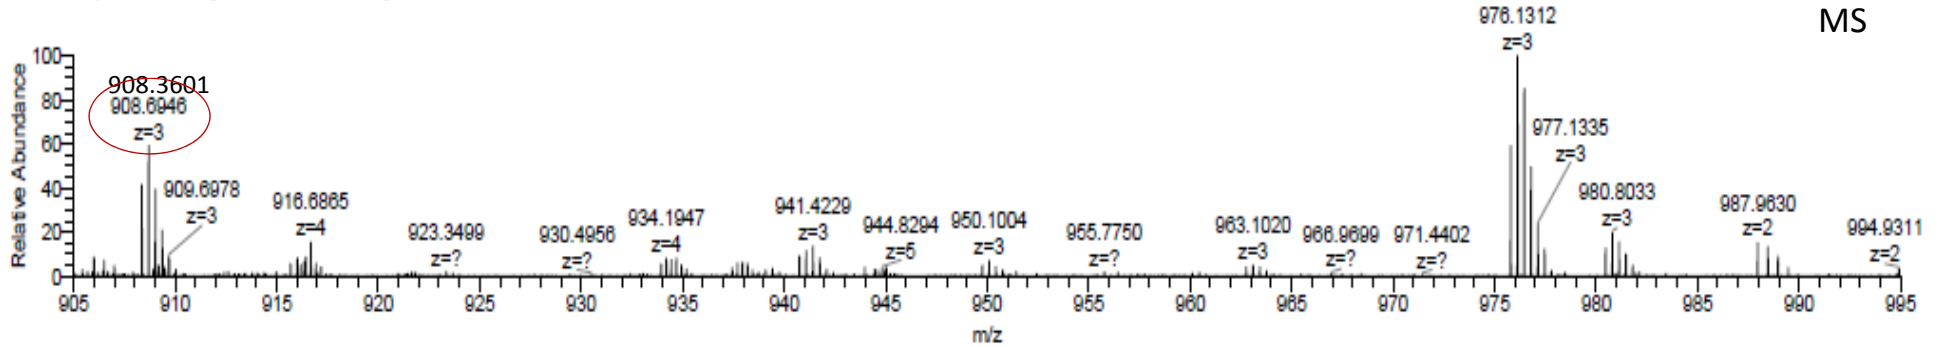

I-1\_ISPD\_aDG373Fc\_T322R#17779 RT: 40.61 AV: 1 NL: 5.46E5  
 F: FTMS + p NSI d Full ms2 908.6952@hod28.00 [120.0000-2000.0000]

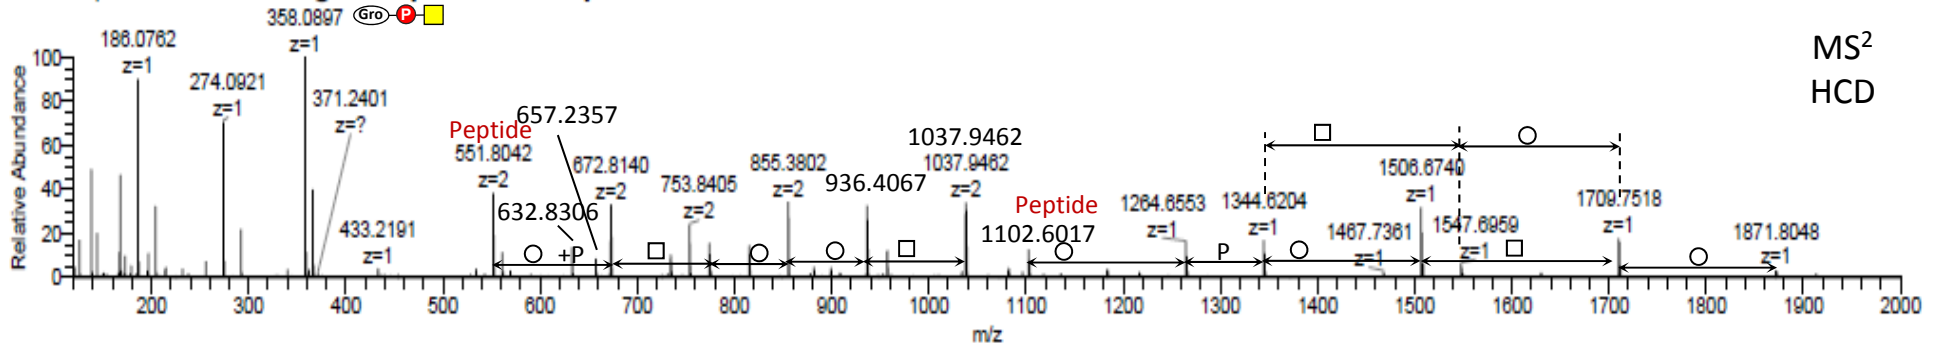

I-1\_ISPD\_aDG373Fc\_T322R#17782 RT: 40.61 AV: 1 NL: 1.63E5  
 F: ITMS + c NSI r d Full ms2 908.6952@cid30.00 [245.0000-2000.0000]

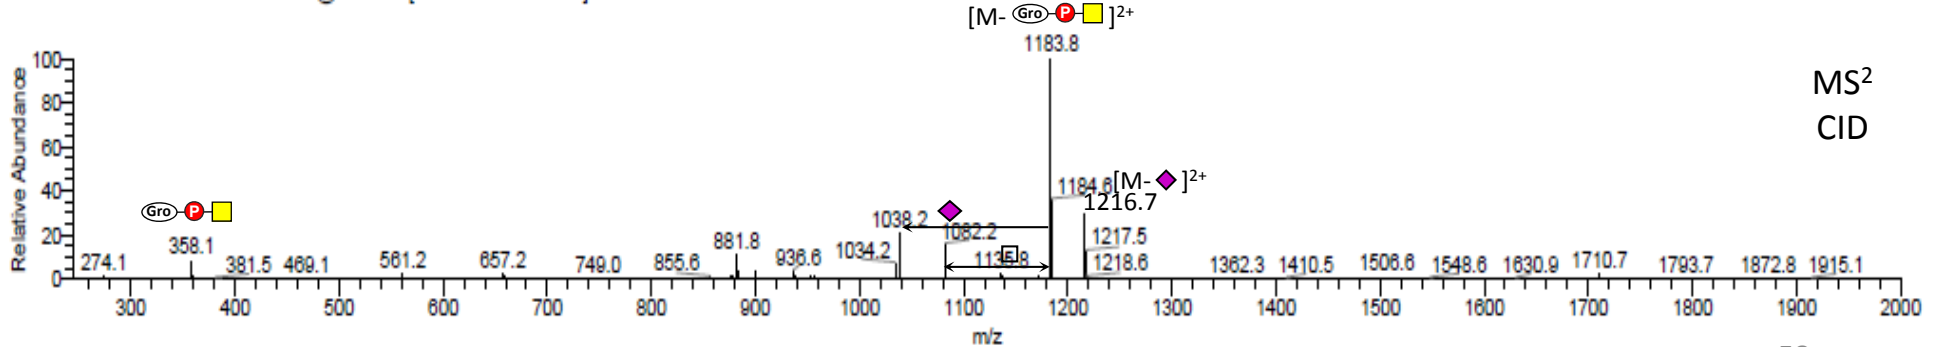

# HCT116- $\Delta$ ISPD<sub>pyr</sub>QIHATPTPVR + Hex<sub>4</sub>HexNAc<sub>4</sub>P<sub>1</sub>GroP<sub>1</sub>

1-1\_ISPD\_aDG373Fc\_T322R #13081-13257 RT: 32.71-33.02 AV: 7 NL: 4.24E8  
 F: FTMS + p NSI Full ms [550.0000-1950.0000]

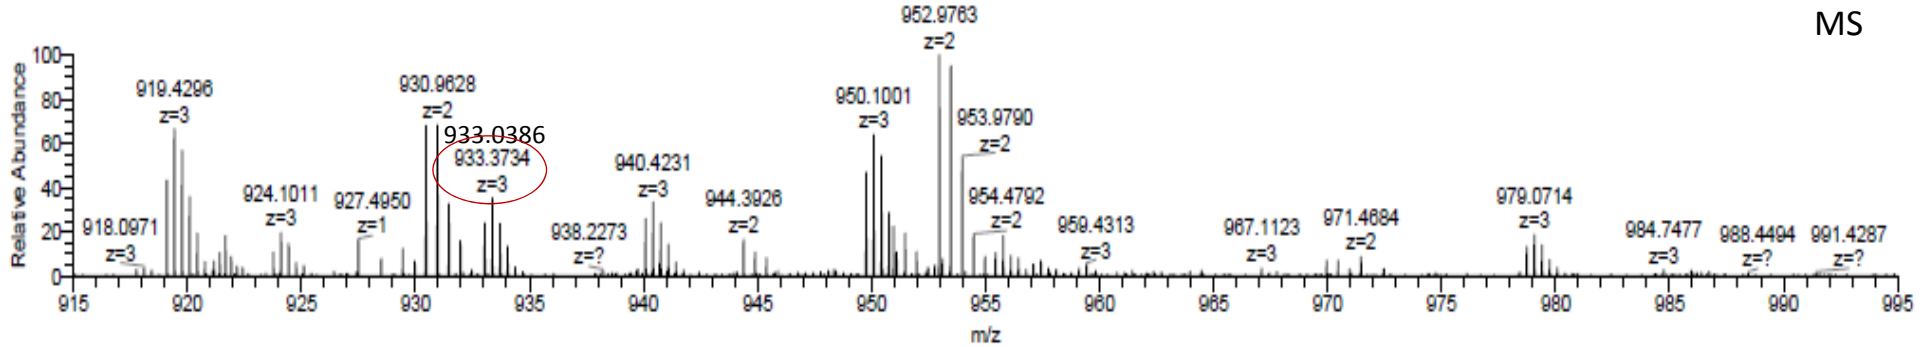

1-1\_ISPD\_aDG373Fc\_T322R #13150 RT: 32.86 AV: 1 NL: 2.49E5  
 T: FTMS + p NSI d Full ms2 933.7088@hcd28.00 [120.0000-2000.0000]

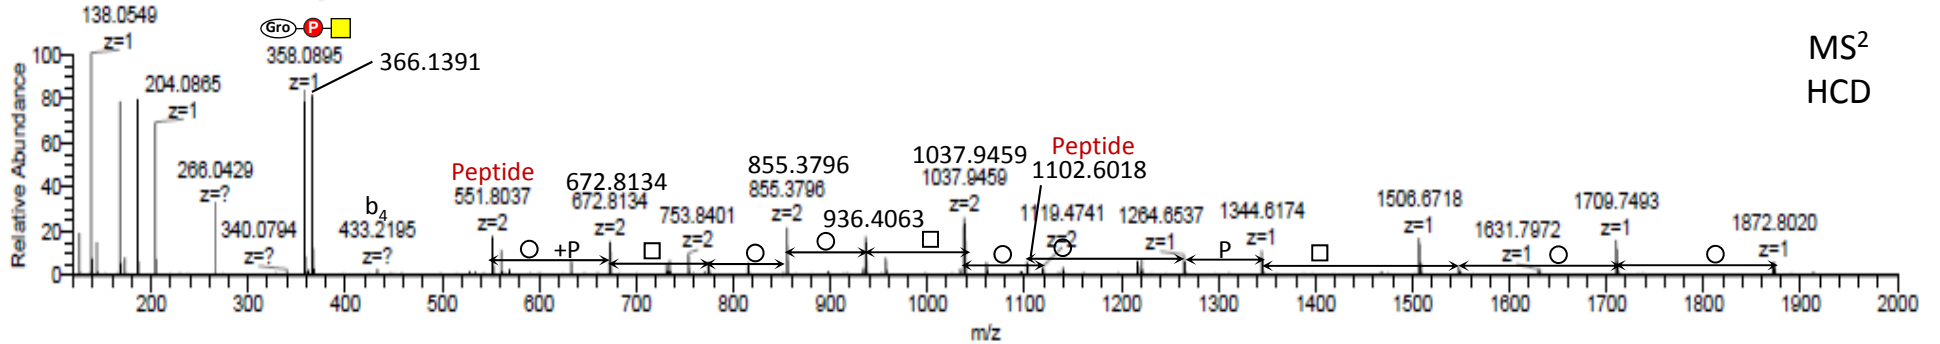

1-1\_ISPD\_aDG373Fc\_T322R #13153 RT: 32.86 AV: 1 NL: 6.31E4  
 T: ITMS + c NSI r d Full ms2 933.7088@cid30.00 [252.0000-2000.0000]

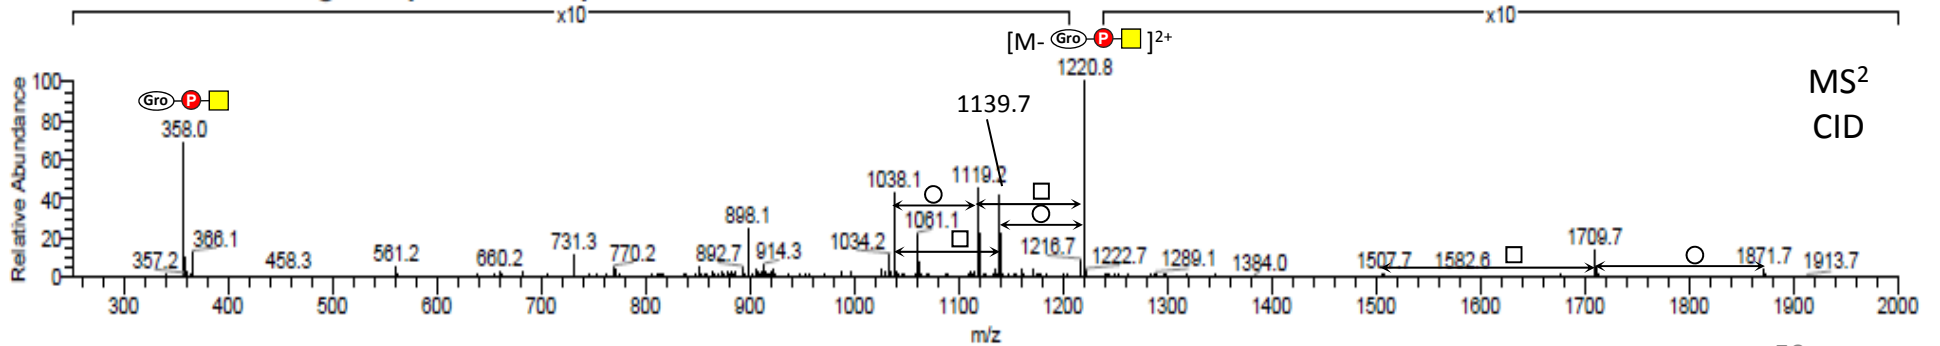

Supplement: 10.1074_M116.062729_mcp.M116.062729-3.pdf [file 10.1074_M116.062729_mcp.M116.062729-3.pdf]
