# Supplementary material
Source: PubMed Central journal article supplement (PMC5098040)
Supplement: 10.1074_M116.062729_mcp.M116.062729-1.pdf [file 10.1074_M116.062729_mcp.M116.062729-1.pdf]

Supplemental Table 1: Manually identified glycoforms of <sup>313</sup>pyrQIHATPTPVR<sup>322</sup> derived from αDG373(T322R)-Fc and their calculated relative abundance<sup>1</sup>

| Composition                                                            | Theoretical [M+H] <sup>+</sup> | Measured m/z | z | Accuracy (ppm) | Elution Time (min) | HEK293 WT | HCT116 WT | HCT116 ΔISPD | HCT116 ΔFKTN | HCT116 ΔFKRP | HCT116 ΔTMEM5 |
|------------------------------------------------------------------------|--------------------------------|--------------|---|----------------|--------------------|-----------|-----------|--------------|--------------|--------------|---------------|
| <b><u>Mucin/Core M1/Core M2</u></b>                                    |                                |              |   |                |                    |           |           |              |              |              |               |
| HexNAC <sub>3</sub>                                                    | 1711.8385                      | 856.4243     | 2 | 1.3            | 23.1               | 2.98E+05  |           |              |              |              |               |
| Hex <sub>1</sub> HexNAC <sub>1</sub> NeuAc <sub>1</sub>                | 1758.8279                      | 879.9188     | 2 | 1.1            | 27.2               | 1.66E+07  | 4.30E+07  | 8.59E+07     | 9.54E+07     | 3.42E+07     | 3.95E+07      |
| Hex <sub>3</sub> HexNAC <sub>1</sub>                                   | 1791.8381                      | 896.4244     | 2 | 1.6            | 23.0               | 7.66E+05  | 4.13E+05  | 1.03E+06     | 1.60E+05     | 1.11E+06     | 1.05E+06      |
| Hex <sub>2</sub> HexNAC <sub>2</sub>                                   | 1832.8647                      | 916.9369     | 2 | 0.7            | 20.8               | 6.81E+07  | 1.16E+07  | 3.08E+07     | 2.45E+07     | 2.23E+07     | 2.14E+07      |
| Hex <sub>1</sub> HexNAC <sub>3</sub>                                   | 1873.8913                      | 937.4496     | 2 | 0.0            | 21.7               | 4.25E+06  | 1.47E+06  | 2.32E+06     | 3.00E+06     | 4.75E+06     | 2.30E+06      |
| Hex <sub>2</sub> HexNAC <sub>3</sub>                                   | 2035.9441                      | 1018.4753    | 2 | 0.7            | 20.3               | 7.77E+05  |           | 3.31E+05     | 3.63E+05     | 5.75E+05     | 4.77E+05      |
| Hex <sub>1</sub> HexNAC <sub>2</sub> NeuAc <sub>2</sub>                | 2049.9233                      | 1025.4678    | 2 | 2.2            | 32.9               | 1.32E+07  | 3.02E+07  | 2.94E+07     | 1.53E+07     | 4.81E+06     | 1.58E+07      |
| Hex <sub>2</sub> HexNAC <sub>2</sub> NeuAc <sub>1</sub>                | 2123.9601                      | 1062.4857    | 2 | 1.6            | 25.6               | 1.26E+07  | 6.56E+06  | 1.12E+07     | 1.91E+07     | 1.06E+07     | 7.62E+06      |
| Hex <sub>4</sub> HexNAC <sub>2</sub>                                   | 2156.9703                      | 1078.9910    | 2 | 1.8            | 24.2               | 7.82E+05  | 3.71E+05  | 8.33E+05     | 2.93E+05     | 5.81E+05     | 5.73E+05      |
| Hex <sub>1</sub> HexNAC <sub>3</sub> NeuAc <sub>1</sub>                | 2164.9867                      | 1082.9991    | 2 | 1.7            | 26.9               | 1.40E+06  | 1.47E+06  | 8.36E+05     | 1.43E+06     | 1.32E+06     | 7.08E+05      |
| Hex <sub>3</sub> HexNAC <sub>3</sub>                                   | 2197.9969                      | 1099.5023    | 2 | 0.1            | 19.3               | 3.47E+06  | 4.64E+06  | 5.71E+06     | 1.43E+07     | 8.57E+06     | 5.86E+06      |
| Hex <sub>2</sub> HexNAC <sub>4</sub>                                   | 2239.0235                      | 1120.0148    | 2 | 0.8            | 20.4               | 1.41E+06  | 3.31E+05  | 3.08E+05     | 1.13E+06     | 1.03E+06     | 5.92E+05      |
| Hex <sub>2</sub> HexNAC <sub>2</sub> NeuAc <sub>2</sub>                | 2415.0555                      | 805.6923     | 3 | 2.4            | 28.8               | 1.07E+07  | 5.07E+06  | 3.50E+06     | 4.52E+06     | 2.89E+06     | 2.24E+06      |
| Hex <sub>3</sub> HexNAC <sub>3</sub> NeuAc <sub>1</sub>                | 2489.0923                      | 830.3703     | 3 | 1.2            | 24.2               | 2.22E+06  | 5.52E+06  | 3.45E+06     | 6.69E+06     | 3.17E+06     | 3.28E+06      |
| Hex <sub>2</sub> HexNAC <sub>4</sub> NeuAc <sub>1</sub>                | 2530.1189                      | 844.0464     | 3 | 1.8            | 23.5               | 5.80E+05  | 2.84E+05  | 1.37E+05     | 4.95E+05     | 1.79E+05     |               |
| Hex <sub>4</sub> HexNAC <sub>4</sub>                                   | 2563.1291                      | 855.0499     | 3 | 1.9            | 19.7               |           | 3.35E+06  | 2.88E+06     | 1.19E+07     | 6.18E+06     | 6.43E+06      |
| Hex <sub>3</sub> HexNAC <sub>5</sub>                                   | 2604.1557                      | 868.7255     | 3 | 2.0            | 20.0               |           | 2.31E+05  | 2.31E+05     | 1.37E+06     | 7.24E+05     | 3.10E+05      |
| Hex <sub>4</sub> HexNAC <sub>4</sub> NeuAc <sub>1</sub>                | 2854.2245                      | 952.0809     | 3 | 0.9            | 23.1               | 3.73E+05  | 3.31E+06  | 2.33E+06     | 5.62E+06     | 3.42E+06     | 2.54E+06      |
| Hex <sub>3</sub> HexNAC <sub>3</sub> NeuAc <sub>3</sub>                | 3071.2831                      | 1024.4330    | 3 | 0.1            | 33.1               |           | 2.66E+06  | 4.77E+05     | 6.23E+05     | 2.05E+05     | 2.14E+05      |
| Hex <sub>4</sub> HexNAC <sub>4</sub> NeuAc <sub>2</sub>                | 3145.3199                      | 1049.1144    | 3 | 2.4            | 27.6               | 8.78E+04  | 1.26E+06  | 9.89E+05     | 1.07E+06     | 6.12E+05     | 5.74E+05      |
| Hex <sub>4</sub> HexNAC <sub>4</sub> NeuAc <sub>3</sub>                | 3436.4153                      | 1146.1439    | 3 | 0.2            | 32.7               |           | 9.90E+05  | 1.62E+05     | 2.08E+05     |              |               |
| <b><u>Core M3</u></b>                                                  |                                |              |   |                |                    |           |           |              |              |              |               |
| Hex <sub>1</sub> HexNAC <sub>2</sub> P <sub>1</sub>                    | 1750.7784                      | 875.8930     | 2 | 0.1            | 30.3               | 1.88E+06  | 1.99E+06  | 1.78E+06     | 2.12E+06     | 1.67E+06     | 1.21E+06      |
| Hex <sub>2</sub> HexNAC <sub>1</sub> P <sub>2</sub>                    | 1789.7179                      | 895.3634     | 2 | 0.6            | 34.2               | 2.74E+05  |           |              |              |              |               |
| Hex <sub>3</sub> HexNAC <sub>1</sub> P <sub>1</sub>                    | 1871.8044                      | 936.4070     | 2 | 0.9            | 27.3               | 5.20E+05  |           |              |              |              |               |
| Hex <sub>2</sub> HexNAC <sub>2</sub> P <sub>1</sub>                    | 1912.8310                      | 956.9213     | 2 | 2.0            | 28.6               | 2.46E+06  | 5.08E+05  | 6.38E+05     | 3.04E+05     |              |               |
| Hex <sub>2</sub> HexNAC <sub>2</sub> P <sub>2</sub>                    | 1992.7934                      | 996.9041     | 2 | 3.5            | 33.0               | 3.81E+06  |           |              |              |              |               |
| Hex <sub>3</sub> HexNAC <sub>2</sub> P <sub>1</sub>                    | 2074.8838                      | 1037.9473    | 2 | 1.4            | 28.1               | 2.47E+06  | 2.55E+05  | 6.27E+05     | 2.67E+05     | 3.32E+05     | 4.08E+05      |
| Hex <sub>2</sub> HexNAC <sub>3</sub> P <sub>1</sub>                    | 2115.9104                      | 1058.4630    | 2 | 3.7            | 27.4               | 9.57E+06  | 9.48E+05  | 1.72E+06     | 2.08E+06     | 1.29E+06     | 2.34E+06      |
| Hex <sub>2</sub> HexNAC <sub>3</sub> P <sub>2</sub>                    | 2195.8767                      | 1098.4422    | 2 | 0.1            | 33.9               | 1.51E+07  | 1.06E+06  | 8.81E+05     | 1.65E+06     | 6.30E+05     | 9.58E+05      |
| Hex <sub>2</sub> HexNAC <sub>2</sub> NeuAc <sub>1</sub> P <sub>1</sub> | 2203.9264                      | 1102.4678    | 2 | 0.6            | 32.3               | 4.12E+05  |           |              |              |              |               |
| Hex <sub>3</sub> HexNAC <sub>3</sub> P <sub>1</sub>                    | 2277.9632                      | 1139.4877    | 2 | 1.9            | 28.3               | 3.48E+07  | 2.63E+06  | 5.73E+06     | 7.12E+06     | 2.37E+06     | 5.89E+06      |
| Hex <sub>2</sub> HexNAC <sub>4</sub> P <sub>1</sub>                    | 2318.9898                      | 1160.0016    | 2 | 2.4            | 28.2               | 6.06E+06  | 2.59E+05  | 3.84E+05     | 5.73E+05     | 1.03E+05     | 3.46E+05      |
| Hex <sub>3</sub> HexNAC <sub>3</sub> P <sub>2</sub>                    | 2357.9295                      | 1179.4707    | 2 | 1.7            | 33.5               | 1.11E+06  |           |              | 4.23E+05     | 2.55E+05     |               |
| Hex <sub>3</sub> HexNAC <sub>2</sub> NeuAc <sub>1</sub> P <sub>1</sub> | 2365.9792                      | 1183.4945    | 2 | 0.8            | 33.7               | 1.04E+06  |           |              |              |              |               |

|                                                                                                                             |           |           |   |     |      |          |          |          |          |          |          |
|-----------------------------------------------------------------------------------------------------------------------------|-----------|-----------|---|-----|------|----------|----------|----------|----------|----------|----------|
| Hex <sub>2</sub> HexNAc <sub>4</sub> P <sub>2</sub>                                                                         | 2398.9561 | 800.3239  | 3 | 0.0 | 33.8 | 8.30E+07 | 7.14E+06 | 5.14E+06 | 1.16E+07 | 2.93E+06 | 4.01E+06 |
| Hex <sub>2</sub> HexNAc <sub>3</sub> NeuAc <sub>1</sub> P <sub>1</sub>                                                      | 2407.0058 | 1204.0075 | 2 | 0.6 | 32.3 | 6.54E+06 | 7.71E+05 | 9.27E+05 | 1.62E+06 | 2.63E+05 | 7.38E+05 |
| Hex <sub>3</sub> HexNAc <sub>3</sub> Fuc <sub>1</sub> P <sub>1</sub>                                                        | 2424.0211 | 1212.5168 | 2 | 1.9 | 27.7 | 3.90E+06 |          |          |          |          |          |
| Hex <sub>2</sub> HexNAc <sub>4</sub> Fuc <sub>1</sub> P <sub>1</sub>                                                        | 2465.0477 | 1233.0302 | 2 | 2.0 | 27.6 | 3.17E+06 |          |          |          |          |          |
| Hex <sub>2</sub> HexNAc <sub>4</sub> P <sub>3</sub>                                                                         | 2478.9224 | 1239.9669 | 2 | 1.4 | 41.2 | 3.30E+06 |          |          |          |          |          |
| Hex <sub>3</sub> HexNAc <sub>4</sub> P <sub>1</sub>                                                                         | 2481.0426 | 1241.0286 | 2 | 2.7 | 26.7 | 1.37E+06 | 3.67E+05 | 1.96E+05 | 6.30E+05 | 2.79E+05 | 3.10E+05 |
| Hex <sub>2</sub> HexNAc <sub>5</sub> P <sub>1</sub>                                                                         | 2522.0692 | 841.3625  | 3 | 1.0 | 26.7 | 3.85E+05 |          |          |          |          |          |
| Hex <sub>3</sub> HexNAc <sub>3</sub> NeuAc <sub>1</sub> P <sub>1</sub>                                                      | 2569.0586 | 857.0248  | 3 | 0.1 | 33.7 | 7.66E+06 | 2.51E+06 | 3.50E+06 | 3.49E+06 | 8.26E+05 | 2.05E+06 |
| Hex <sub>4</sub> HexNAc <sub>4</sub> P <sub>1</sub>                                                                         | 2643.0954 | 1322.0543 | 2 | 2.0 | 27.8 |          |          | 3.73E+05 | 4.91E+05 | 1.09E+05 | 3.80E+05 |
| Hex <sub>2</sub> HexNAc <sub>3</sub> NeuAc <sub>2</sub> P <sub>1</sub>                                                      | 2698.1012 | 900.0403  | 3 | 1.5 | 37.0 | 1.45E+06 |          |          |          |          |          |
| Hex <sub>4</sub> HexNAc <sub>4</sub> NeuAc <sub>1</sub> P <sub>1</sub>                                                      | 2934.1908 | 978.7375  | 3 | 2.1 | 33.0 |          | 4.01E+05 | 7.40E+05 | 6.09E+05 | 1.21E+05 | 3.03E+05 |
| <b>Core M3 with RboP</b>                                                                                                    |           |           |   |     |      |          |          |          |          |          |          |
| Hex <sub>1</sub> HexNAc <sub>2</sub> P <sub>1</sub> RboP <sub>1</sub>                                                       | 1964.8025 | 982.9086  | 2 | 3.5 | 36.8 | 2.35E+05 | 6.09E+05 |          |          | 4.60E+06 |          |
| Hex <sub>2</sub> HexNAc <sub>2</sub> P <sub>1</sub> RboP <sub>1</sub>                                                       | 2126.8553 | 1063.9316 | 2 | 0.0 | 33.7 |          |          |          |          | 4.94E+05 |          |
| Hex <sub>2</sub> HexNAc <sub>3</sub> P <sub>1</sub> RboP <sub>1</sub>                                                       | 2329.9347 | 1165.4716 | 2 | 0.3 | 31.4 | 5.02E+05 |          |          |          | 7.80E+05 |          |
| Hex <sub>2</sub> HexNAc <sub>3</sub> P <sub>2</sub> RboP <sub>1</sub>                                                       | 2409.9010 | 1205.4568 | 2 | 2.0 | 41.1 | 7.29E+05 |          |          |          |          |          |
| Hex <sub>1</sub> HexNA <sub>2</sub> P <sub>1</sub> RboP <sub>2</sub> Pent <sub>1</sub> HexA <sub>1</sub>                    | 2486.9010 | 1243.9546 | 2 | 0.2 | 49.0 | 3.40E+05 |          |          |          |          |          |
| Hex <sub>3</sub> HexNAc <sub>3</sub> P <sub>1</sub> RboP <sub>1</sub>                                                       | 2491.9875 | 831.3351  | 3 | 0.9 | 32.4 | 1.19E+06 | 4.70E+05 |          |          | 2.90E+06 | 1.80E+05 |
| Hex <sub>2</sub> HexNAc <sub>4</sub> P <sub>2</sub> RboP <sub>1</sub>                                                       | 2612.9804 | 871.6663  | 3 | 1.1 | 40.6 | 6.17E+06 | 9.69E+05 |          |          | 2.45E+06 |          |
| Hex <sub>2</sub> HexNAc <sub>3</sub> NeuAc <sub>1</sub> P <sub>1</sub> RboP <sub>1</sub>                                    | 2621.0301 | 874.3494  | 3 | 0.9 | 38.7 |          |          |          |          | 2.61E+05 |          |
| Hex <sub>2</sub> HexNA <sub>4</sub> P <sub>2</sub> GroP <sub>1</sub> RboP <sub>1</sub>                                      | 2766.9834 | 923.0001  | 3 | 0.5 | 64.5 |          |          |          |          | 7.64E+05 |          |
| Hex <sub>3</sub> HexNA <sub>3</sub> NeuAc <sub>1</sub> P <sub>1</sub> RboP <sub>1</sub>                                     | 2783.0829 | 928.3659  | 3 | 0.3 | 40.7 | 9.57E+05 |          |          |          | 1.98E+06 |          |
| Hex <sub>3</sub> HexNA <sub>3</sub> P <sub>1</sub> RboP <sub>2</sub> Pent <sub>1</sub> HexA <sub>1</sub>                    | 3014.0860 | 1005.3695 | 3 | 2.3 | 42.9 | 5.90E+05 |          |          |          |          |          |
| Hex <sub>2</sub> HexNA <sub>4</sub> P <sub>2</sub> RboP <sub>2</sub> Pent <sub>1</sub> HexA <sub>1</sub>                    | 3135.0789 | 1045.7007 | 3 | 2.4 | 56.5 | 1.39E+06 |          |          |          |          |          |
| Hex <sub>3</sub> HexNA <sub>3</sub> NeuAc <sub>1</sub> P <sub>1</sub> RboP <sub>2</sub> Pent <sub>1</sub> HexA <sub>1</sub> | 3305.1814 | 1102.3987 | 3 | 0.3 | 55.4 | 3.81E+05 |          |          |          |          |          |
| <b>Core M3 with GroP</b>                                                                                                    |           |           |   |     |      |          |          |          |          |          |          |
| Hex <sub>1</sub> HexNAc <sub>2</sub> P <sub>1</sub> GroP <sub>1</sub>                                                       | 1904.7820 | 952.8949  | 2 | 0.0 | 36.8 |          | 7.71E+05 | 1.25E+06 |          | 4.41E+05 | 5.01E+05 |
| Hex <sub>2</sub> HexNAc <sub>2</sub> P <sub>1</sub> GroP <sub>1</sub>                                                       | 2066.8341 | 1033.9222 | 2 | 1.2 | 33.6 |          |          | 2.47E+05 |          |          |          |
| Hex <sub>2</sub> HexNAc <sub>3</sub> P <sub>1</sub> GroP <sub>1</sub>                                                       | 2269.9135 | 1135.4620 | 2 | 1.2 | 32.3 |          |          | 3.08E+05 |          |          | 1.94E+05 |
| Hex <sub>3</sub> HexNAc <sub>3</sub> P <sub>1</sub> GroP <sub>1</sub>                                                       | 2431.9663 | 811.3284  | 3 | 1.3 | 33.5 | 1.64E+05 | 8.33E+05 | 2.35E+06 |          | 4.22E+05 | 1.10E+06 |
| Hex <sub>2</sub> HexNAc <sub>4</sub> P <sub>2</sub> GroP <sub>1</sub>                                                       | 2552.9592 | 851.6586  | 3 | 0.4 | 41.1 | 1.39E+06 | 2.64E+06 | 1.92E+06 |          | 4.63E+05 | 8.99E+05 |
| Hex <sub>3</sub> HexNAc <sub>3</sub> NeuAc <sub>1</sub> P <sub>1</sub> GroP <sub>1</sub>                                    | 2723.0617 | 908.3601  | 3 | 1.1 | 40.7 |          | 1.44E+06 | 2.50E+06 |          | 2.90E+05 | 6.43E+05 |
| Hex <sub>4</sub> HexNAc <sub>4</sub> P <sub>1</sub> GroP <sub>1</sub>                                                       | 2797.0985 | 933.0386  | 3 | 0.6 | 32.8 |          |          | 5.71E+05 |          |          |          |

<sup>1</sup>The normalized intensity for each glycopeptide was calculated based on the base peak intensity of its extracted ion chromatogram divided by the sample-dependent normalization factor. The normalization factor for each wild type and mutant sample was calculated based on the average intensity of the three most abundant peptides derived from the Fc region, namely FNWYVDGVEVHNAK (m/z 559.9403, z=3), EPQVYTLPPSR (m/z 643.8424, z=2), TTPPVLDSDGSFFLYSK (m/z 937.4650, z=2), common to all αDG373(T322R)-Fc proteins. This factor was used to correct for different yields of the protein from each sample to allow the abundance of each glycopeptide to be compared across different samples. The normalized intensity for each glycopeptide was calculated based on the base peak intensity of its extracted ion chromatogram divided by the sample-dependent normalization factor. The normalization factor for each wild type and mutant sample was calculated based on the average intensity of the three most abundant

peptides derived from the Fc region, namely FNWYVDGVEVHNAK (m/z 559.9403, z=3), EPQVYTLPPSR (m/z 643.8424, z=2), TTPPVLDSDGSFFLYSK (m/z 937.4650, z=2), common to all  $\alpha$ DG373(T322R)-Fc proteins. This factor was used to correct for different yields of the protein from each sample to allow the abundance of each glycopeptide to be compared across different samples. A representative set of annotated mass labeled HCD/CID spectra for each of the precursors listed here can be found in supplemental Fig. 5.
